# Supplementary material for: TRPM7 contributes to pyroptosis and its involvement in status epilepticus
Source: PubMed Central journal article supplement — J Neuroinflammation. 2024 Dec 1;21:315. doi: 10.1186/s12974-024-03292-4 (PMC11608501; doi:10.1186/s12974-024-03292-4), 2024-12-01

# Western blots full scans

## Figure 1H

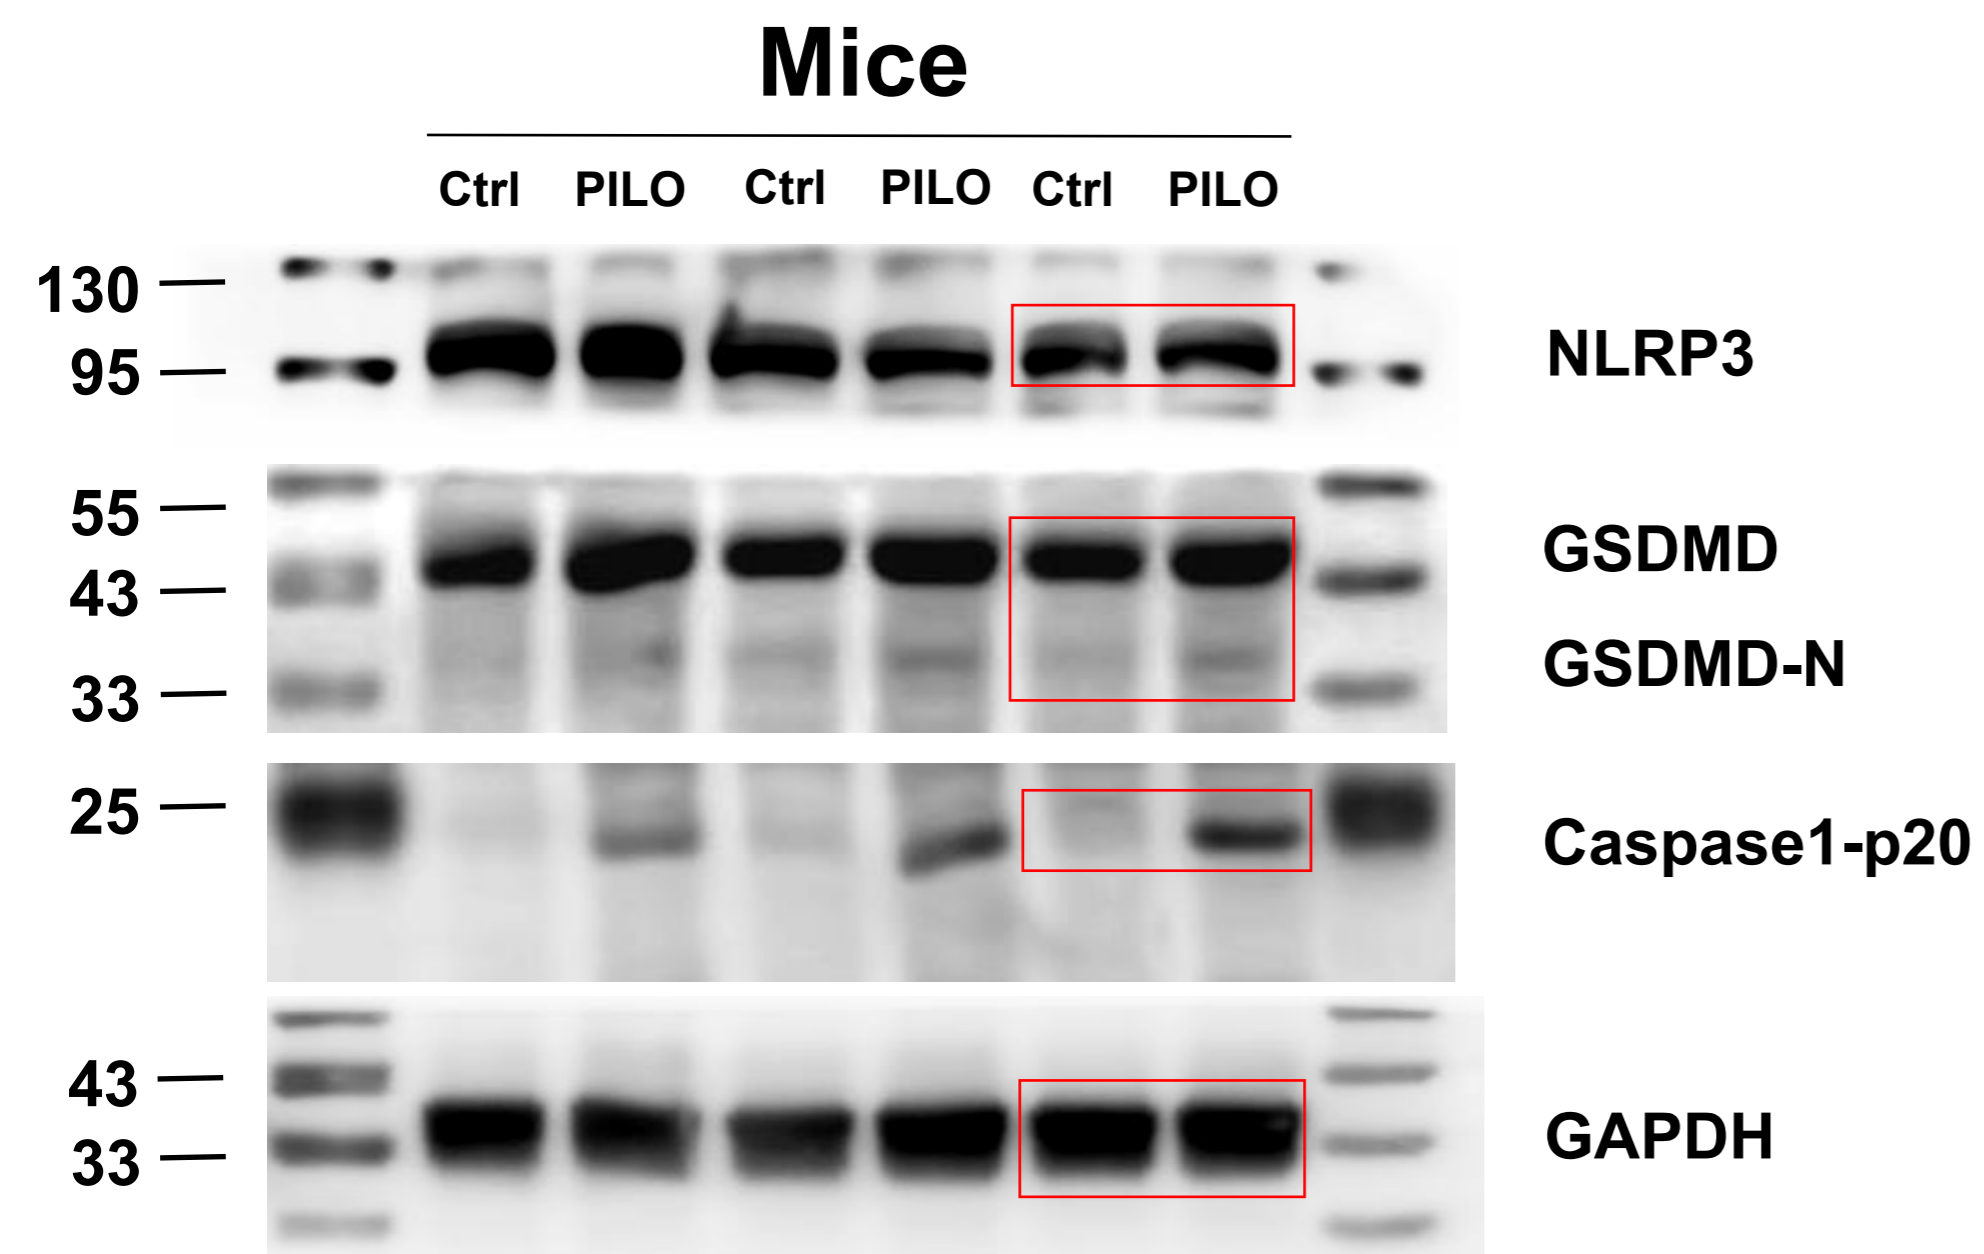

## Figure 1I

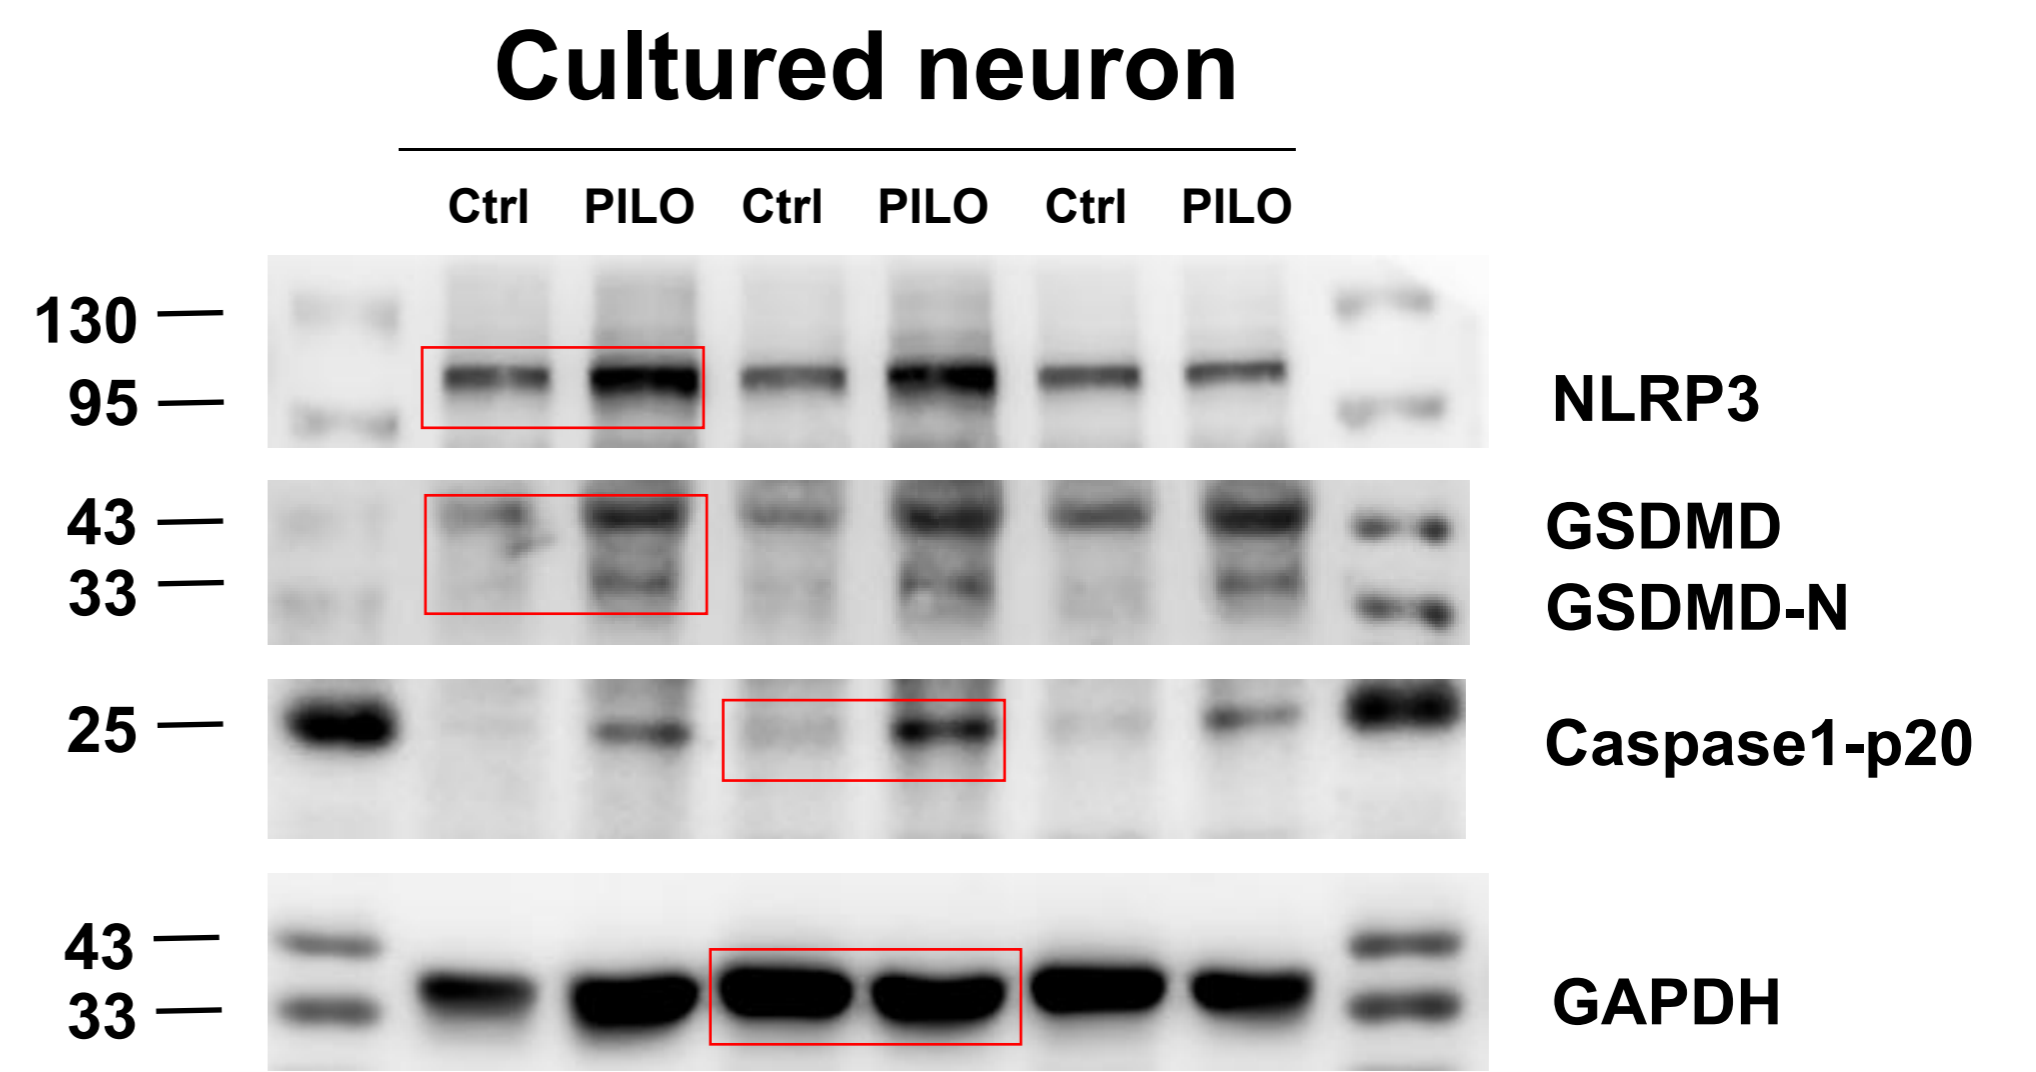

## Figure 1K

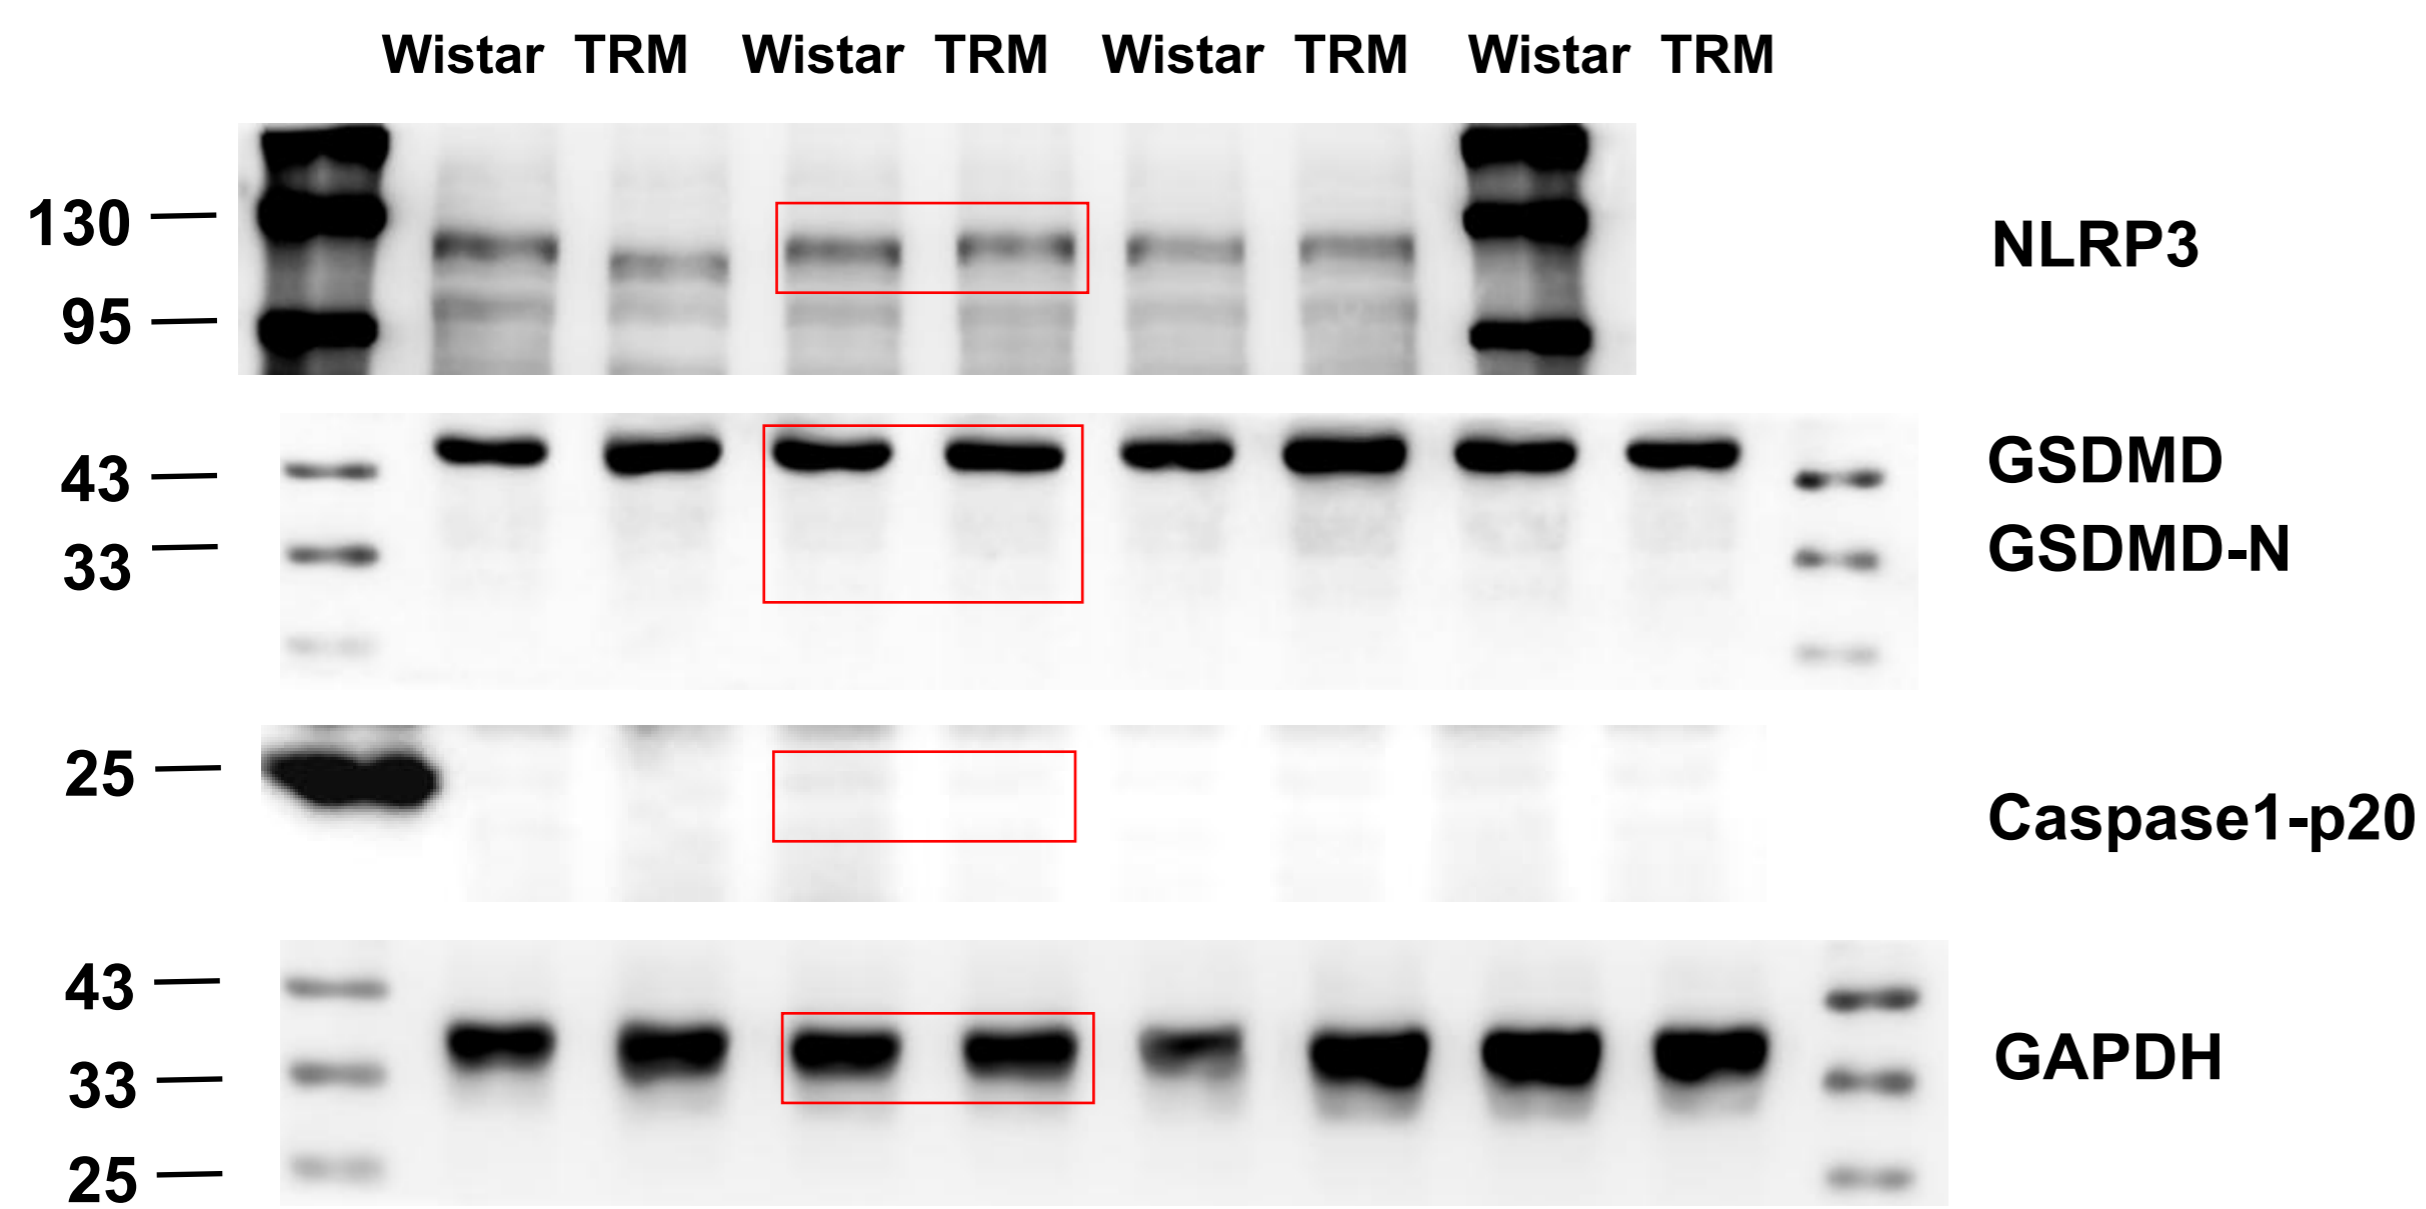

## Supplemental Figure 1C N2a

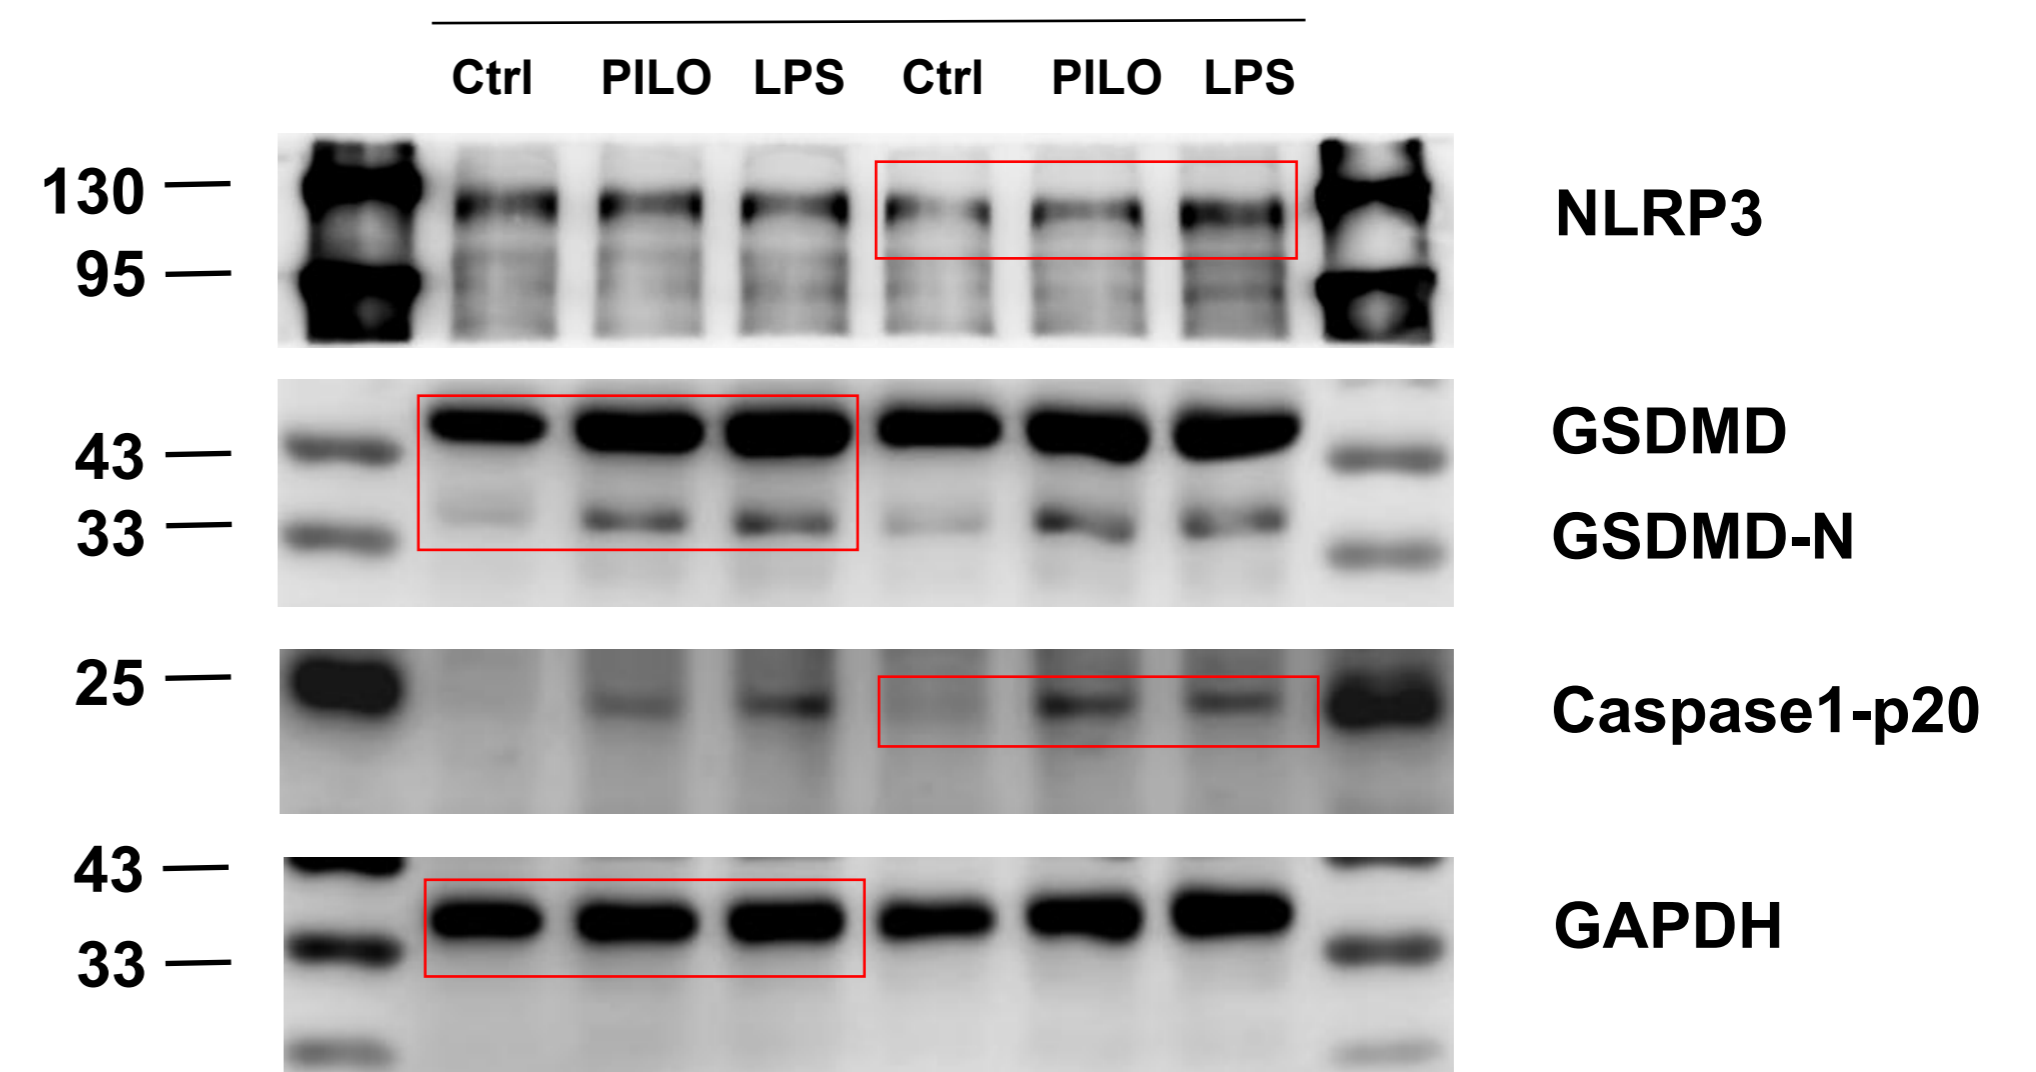

## Supplemental Figure 1F

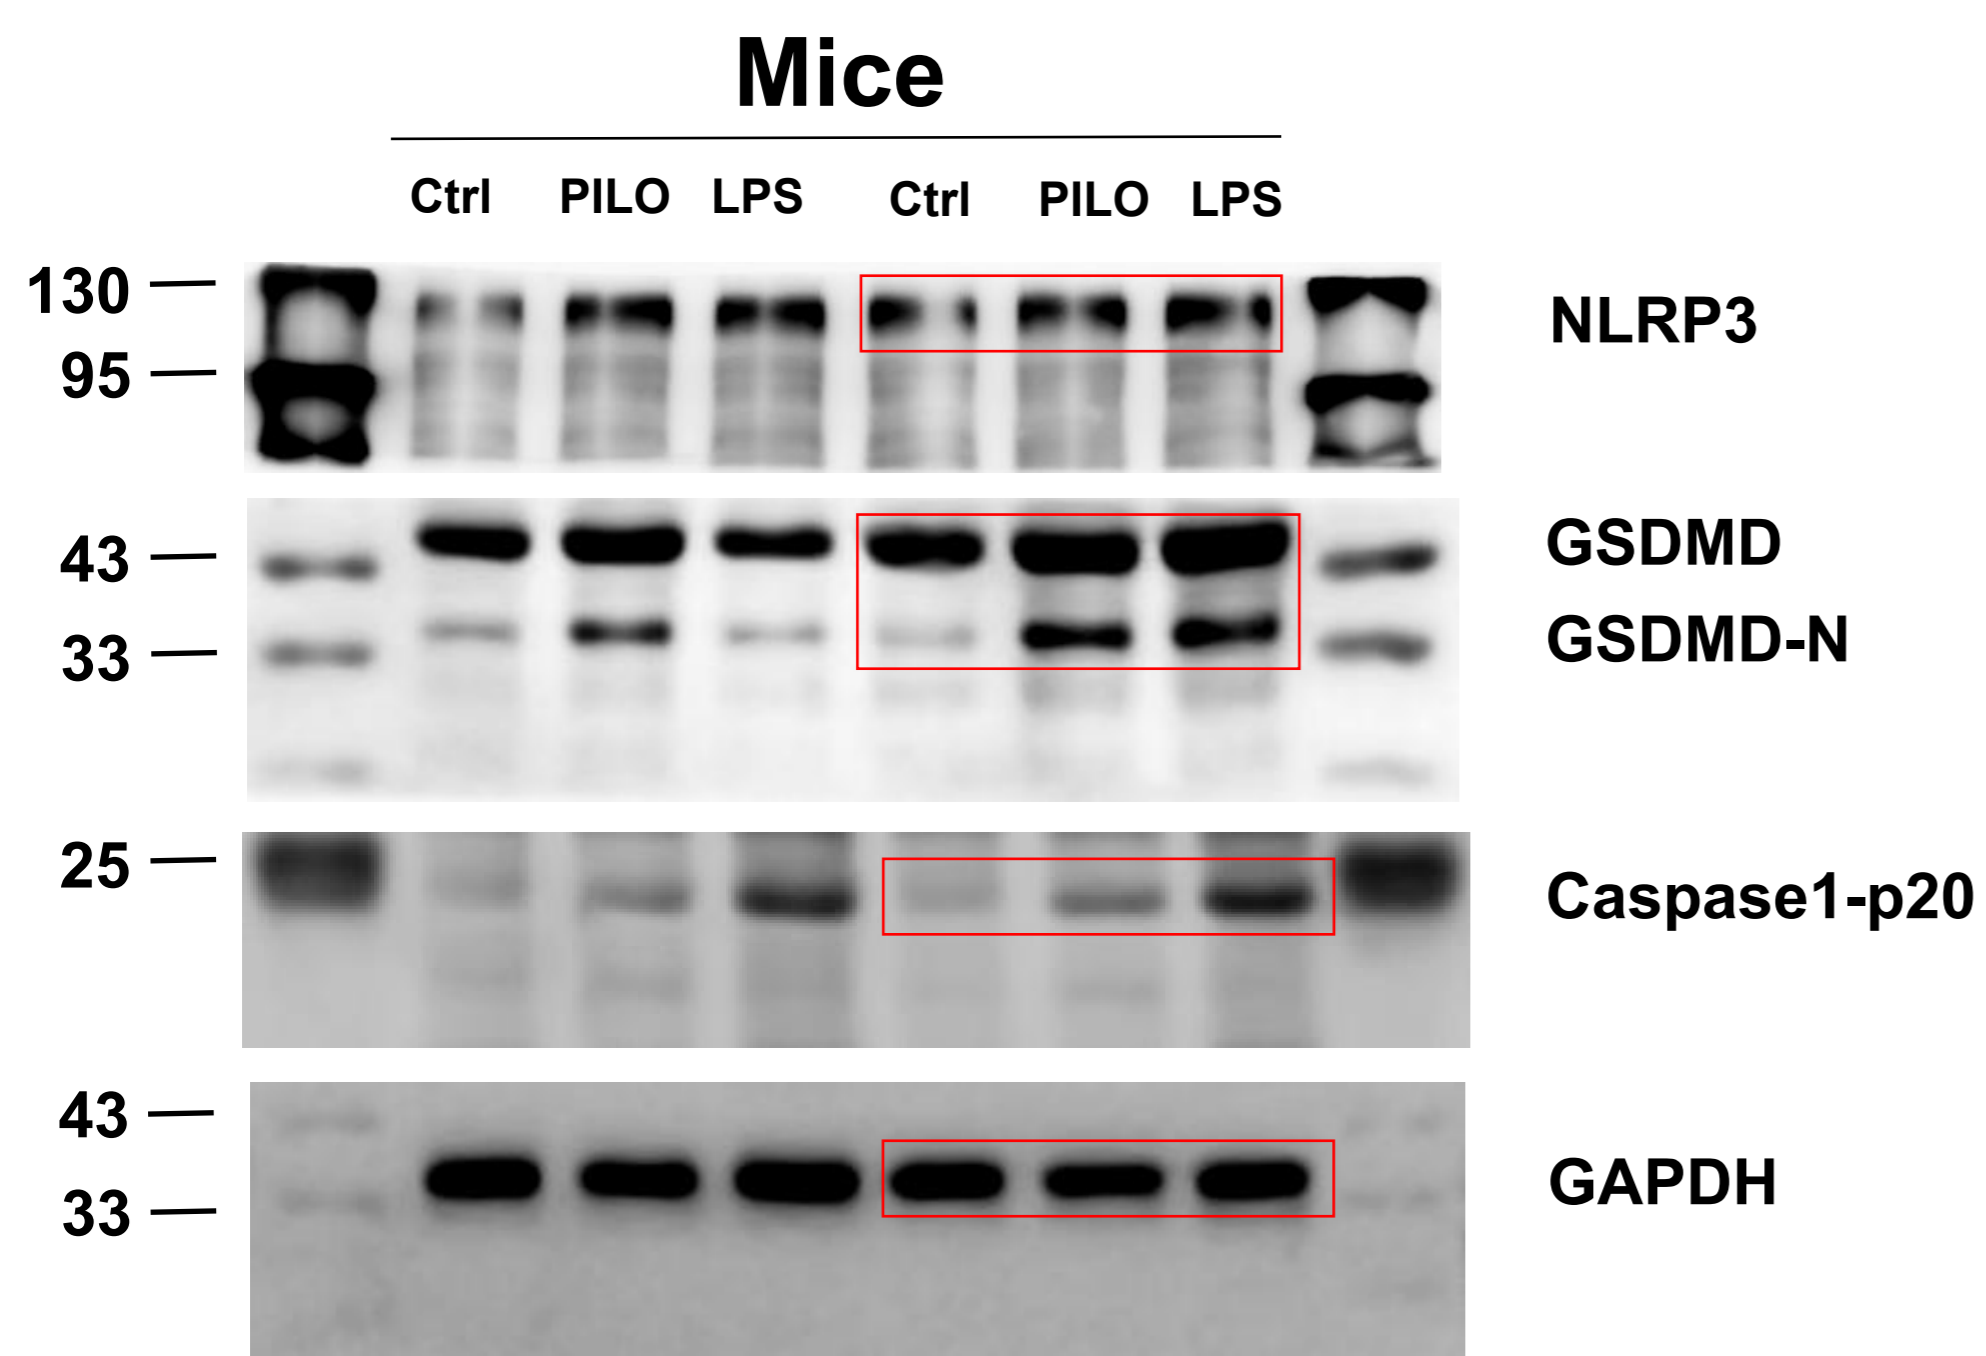

**Figure 2A**

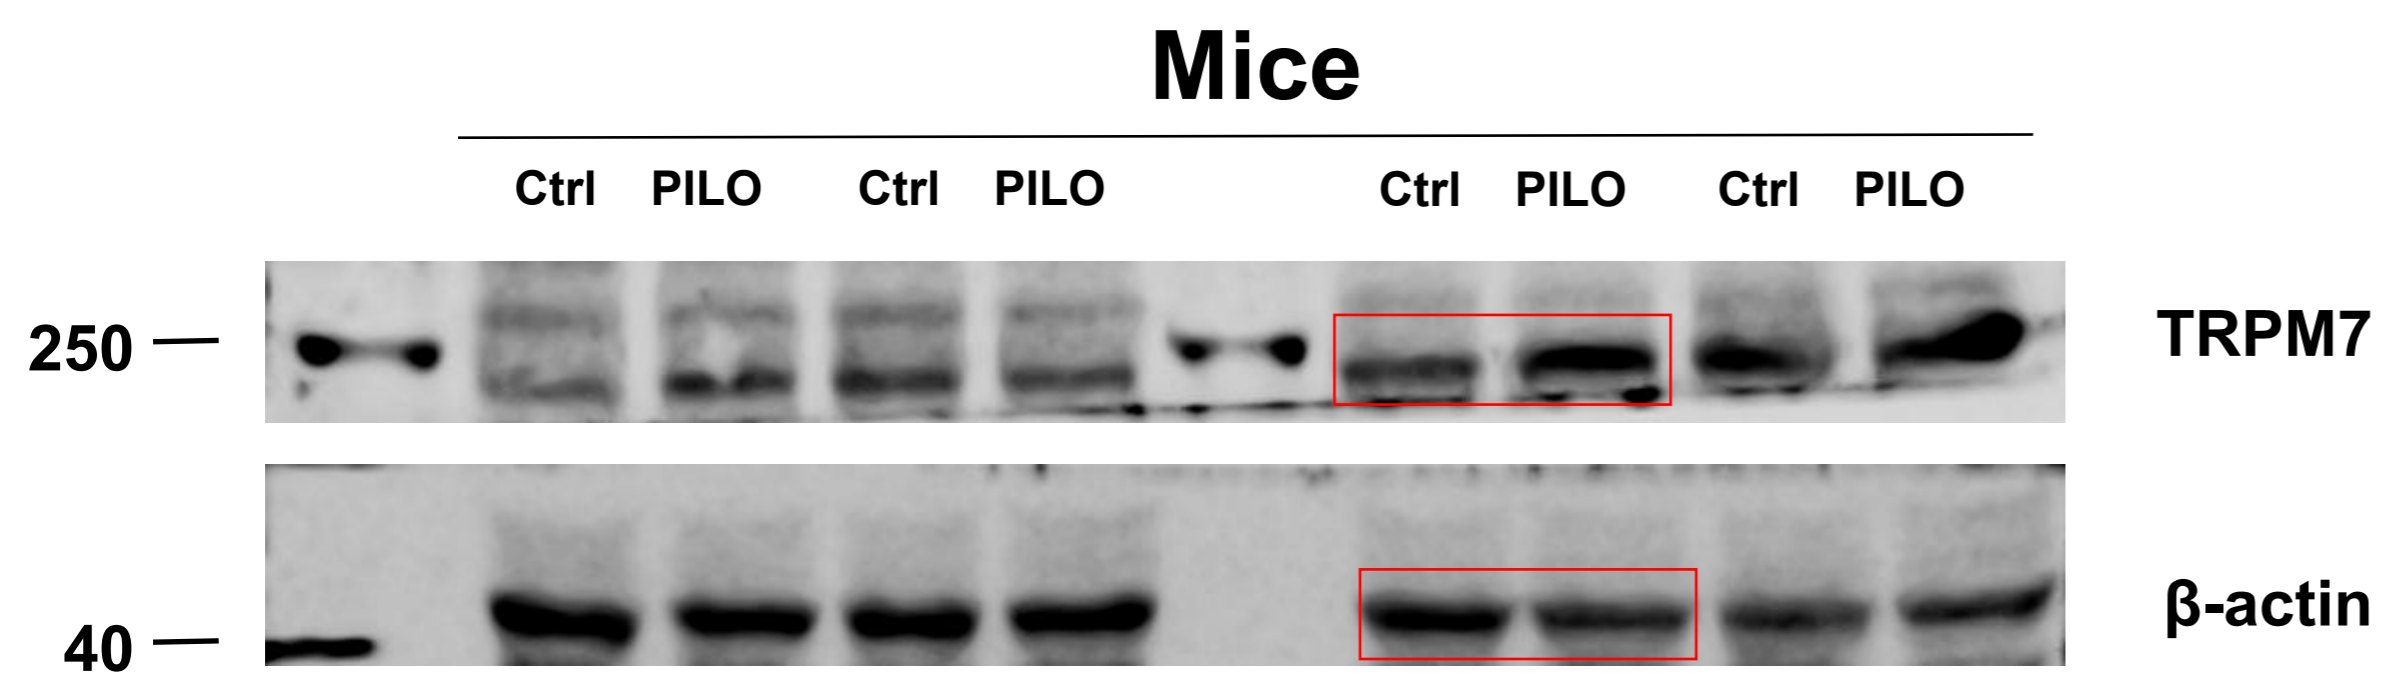

**Supplemental Figure 2E**

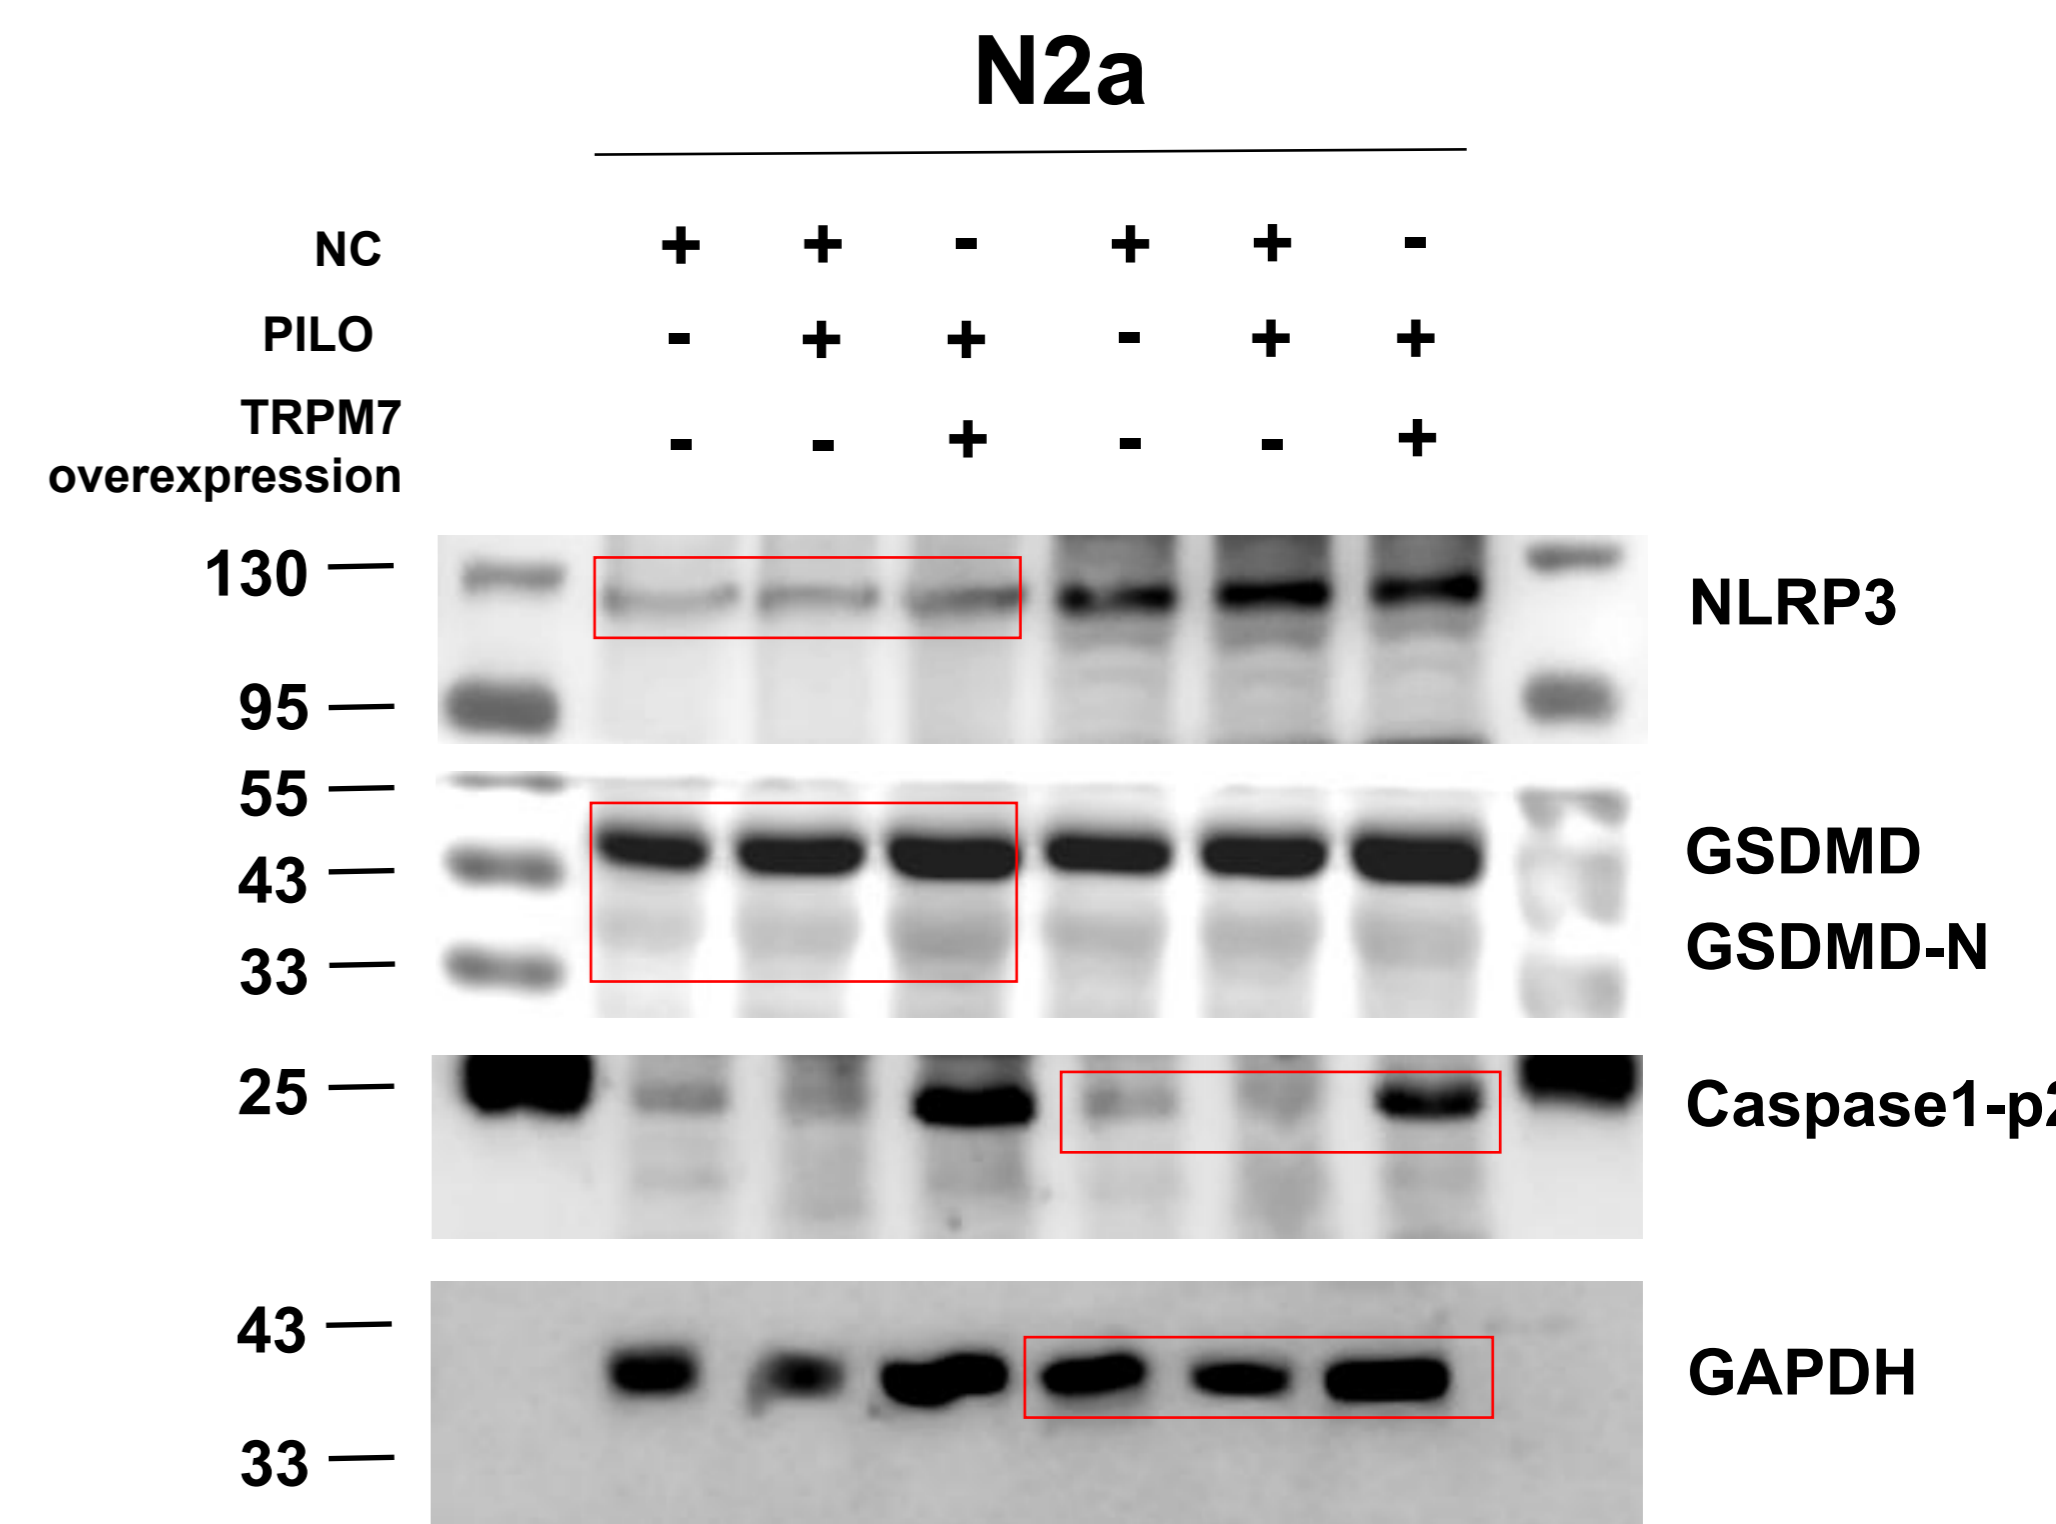

**Figure 2H**

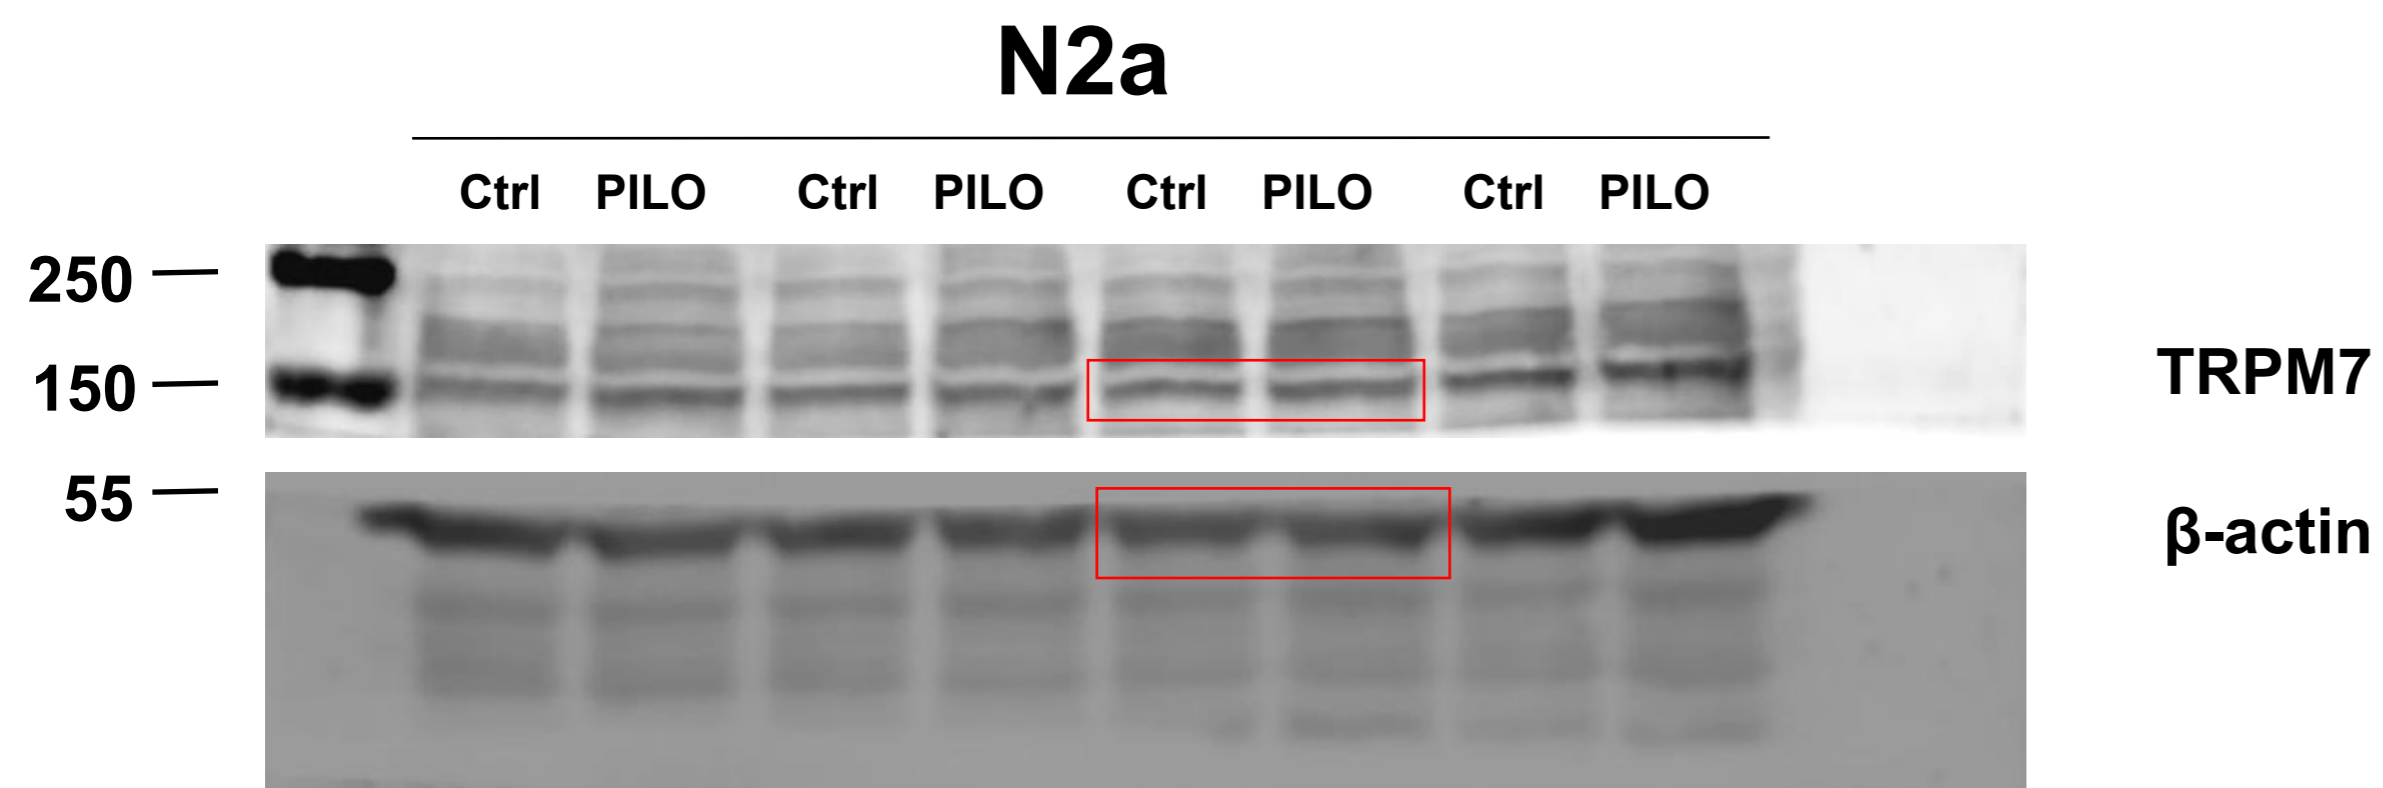

**Supplemental Figure 2F**

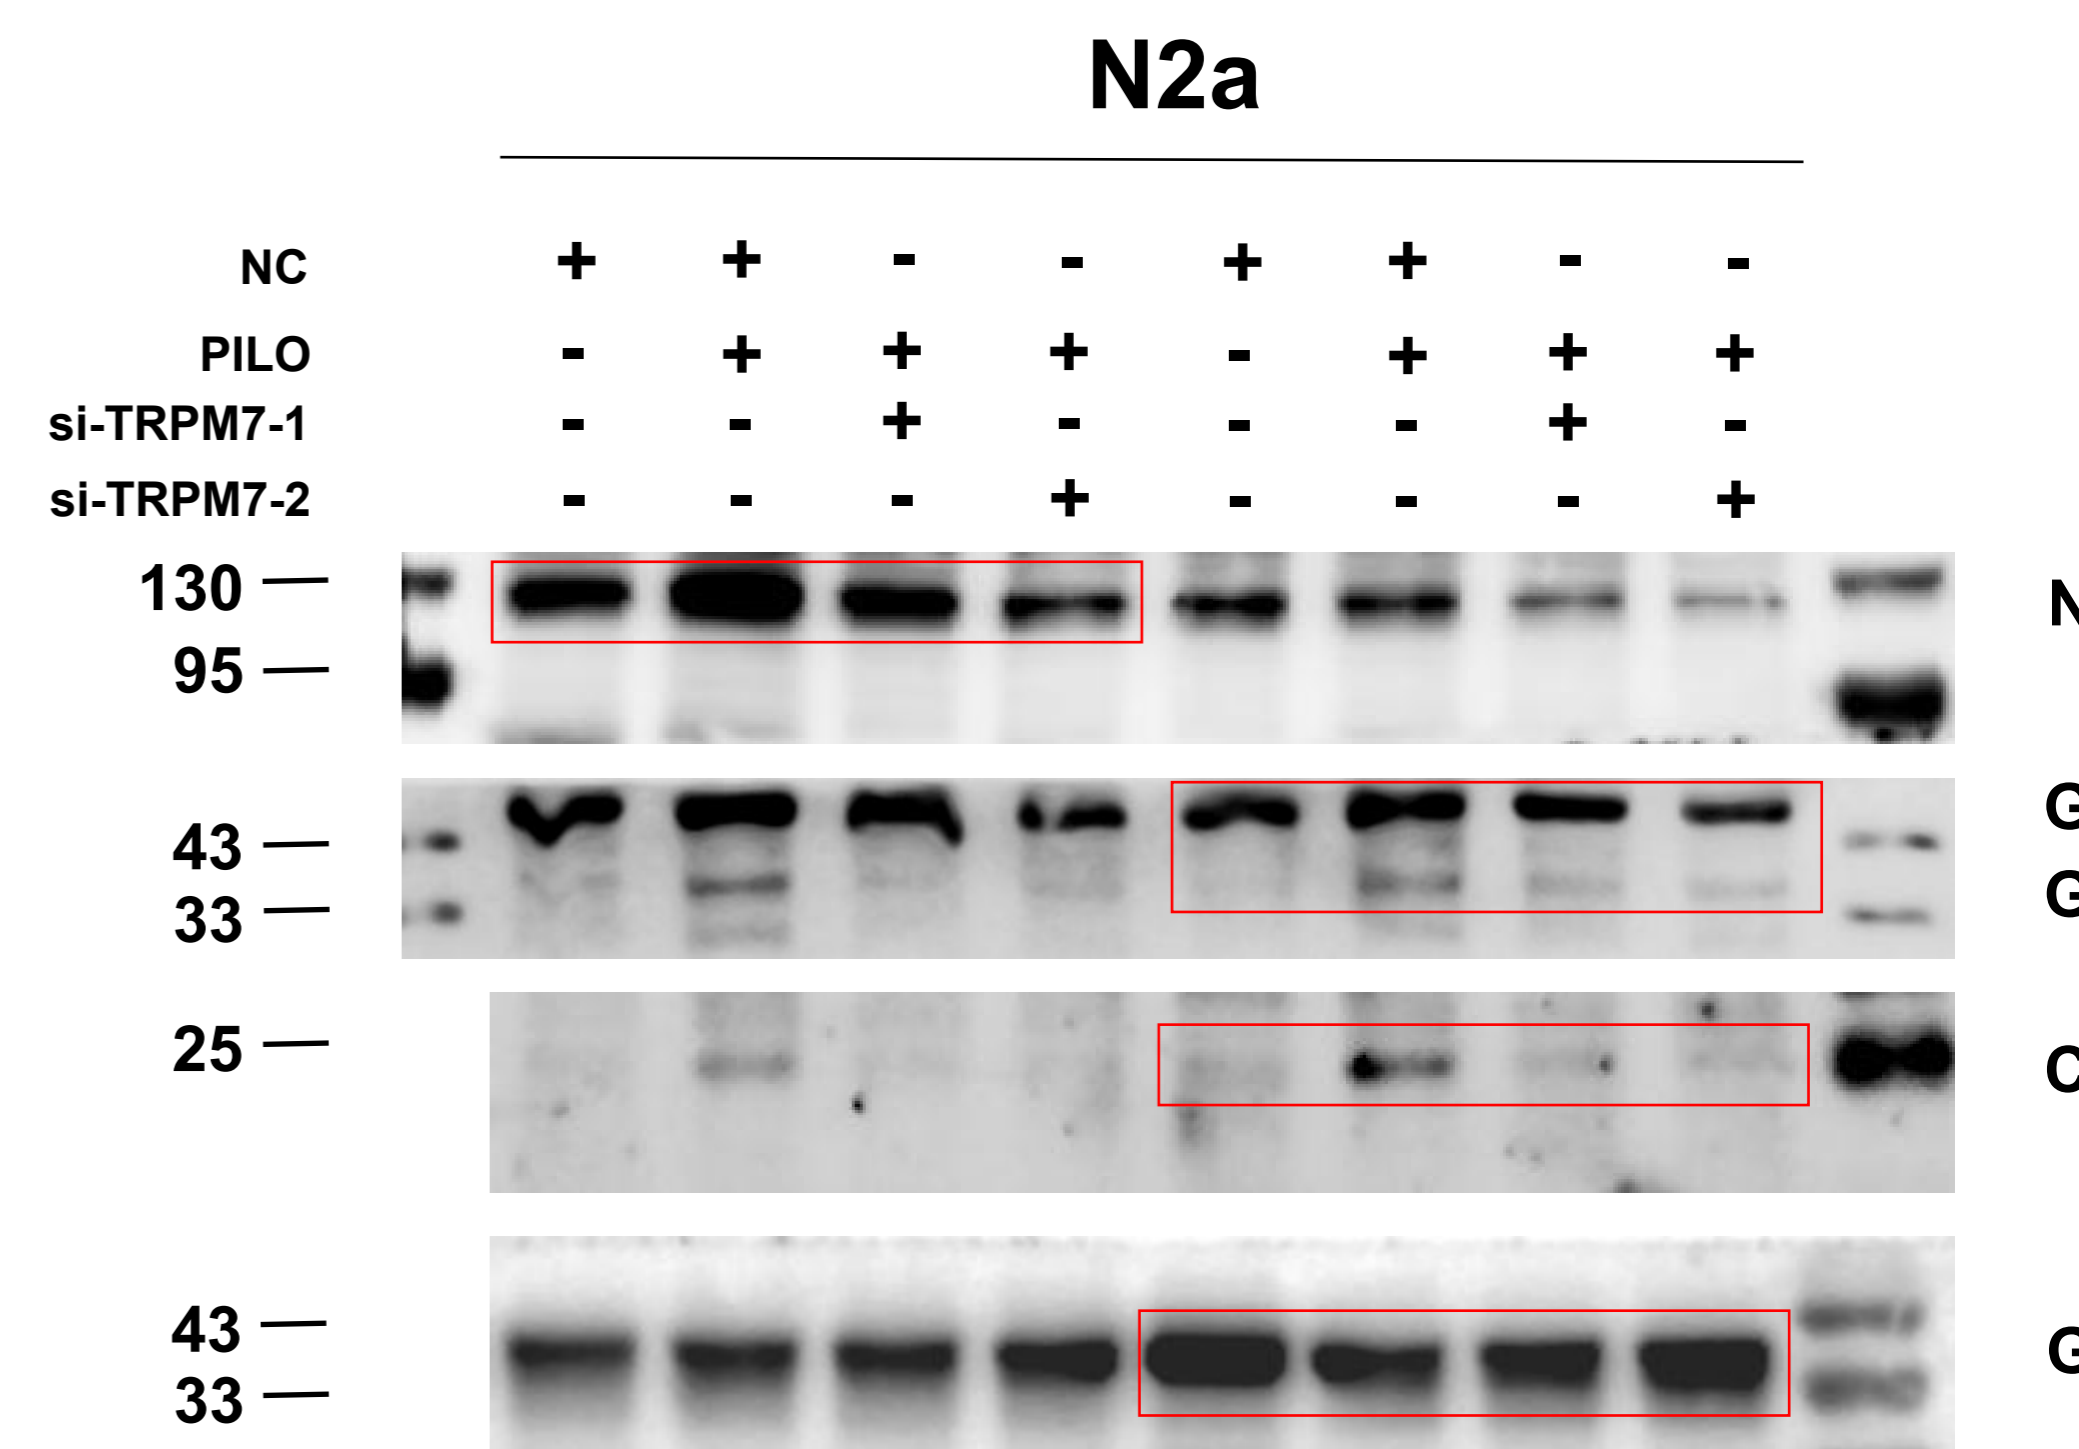

**Figure 2C**

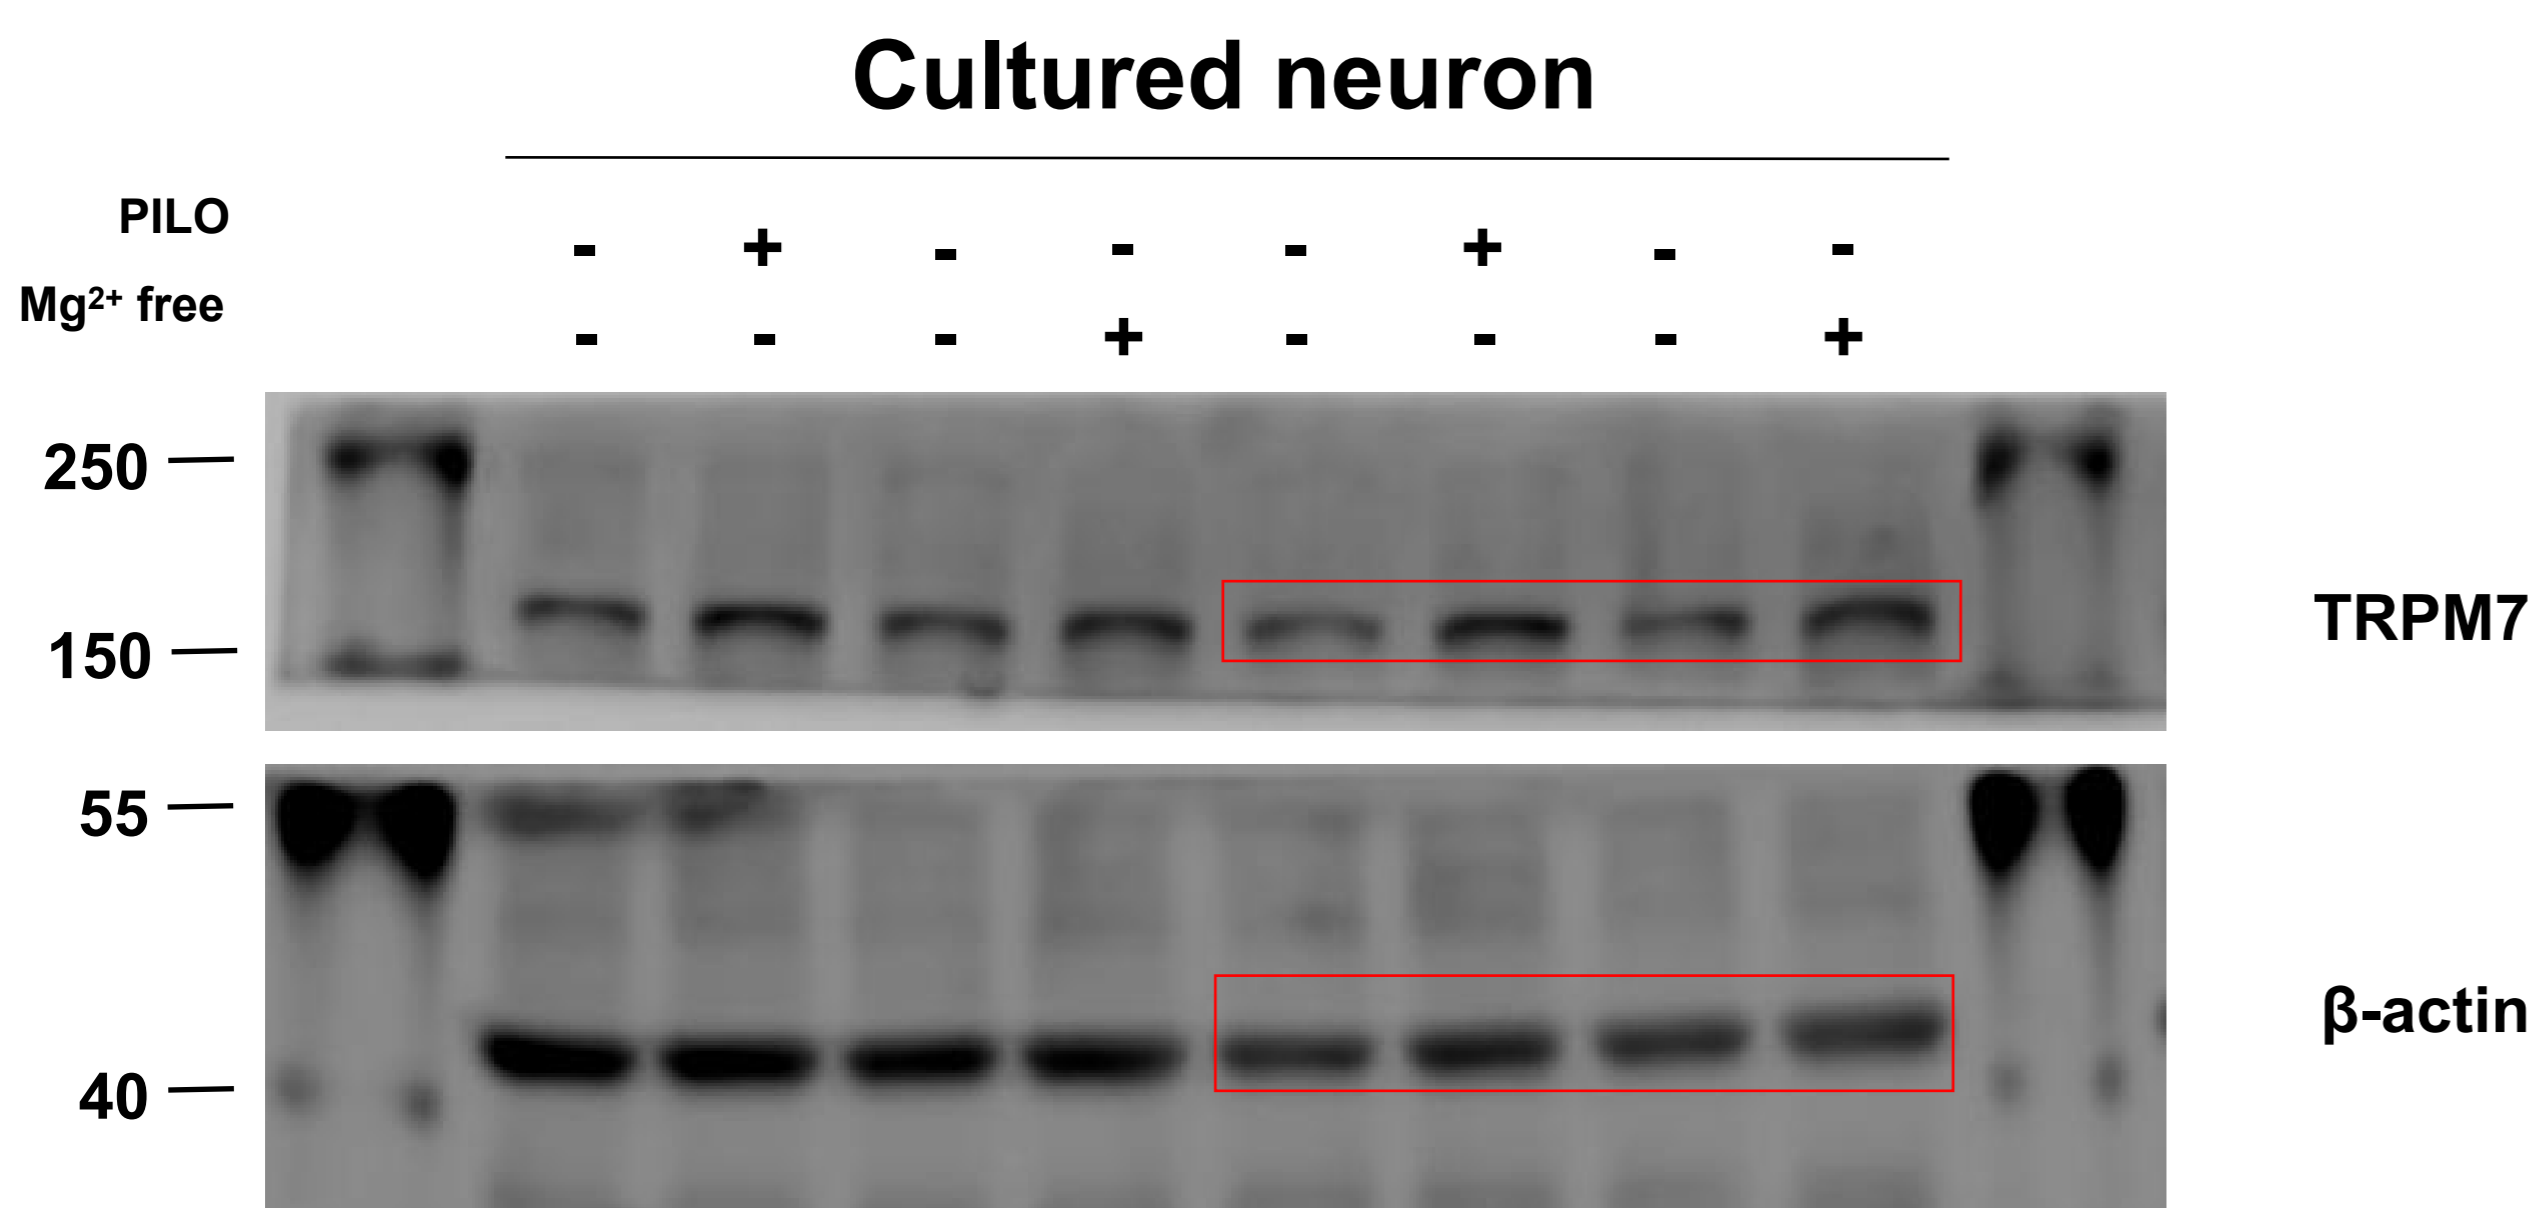

**Figure 2J**

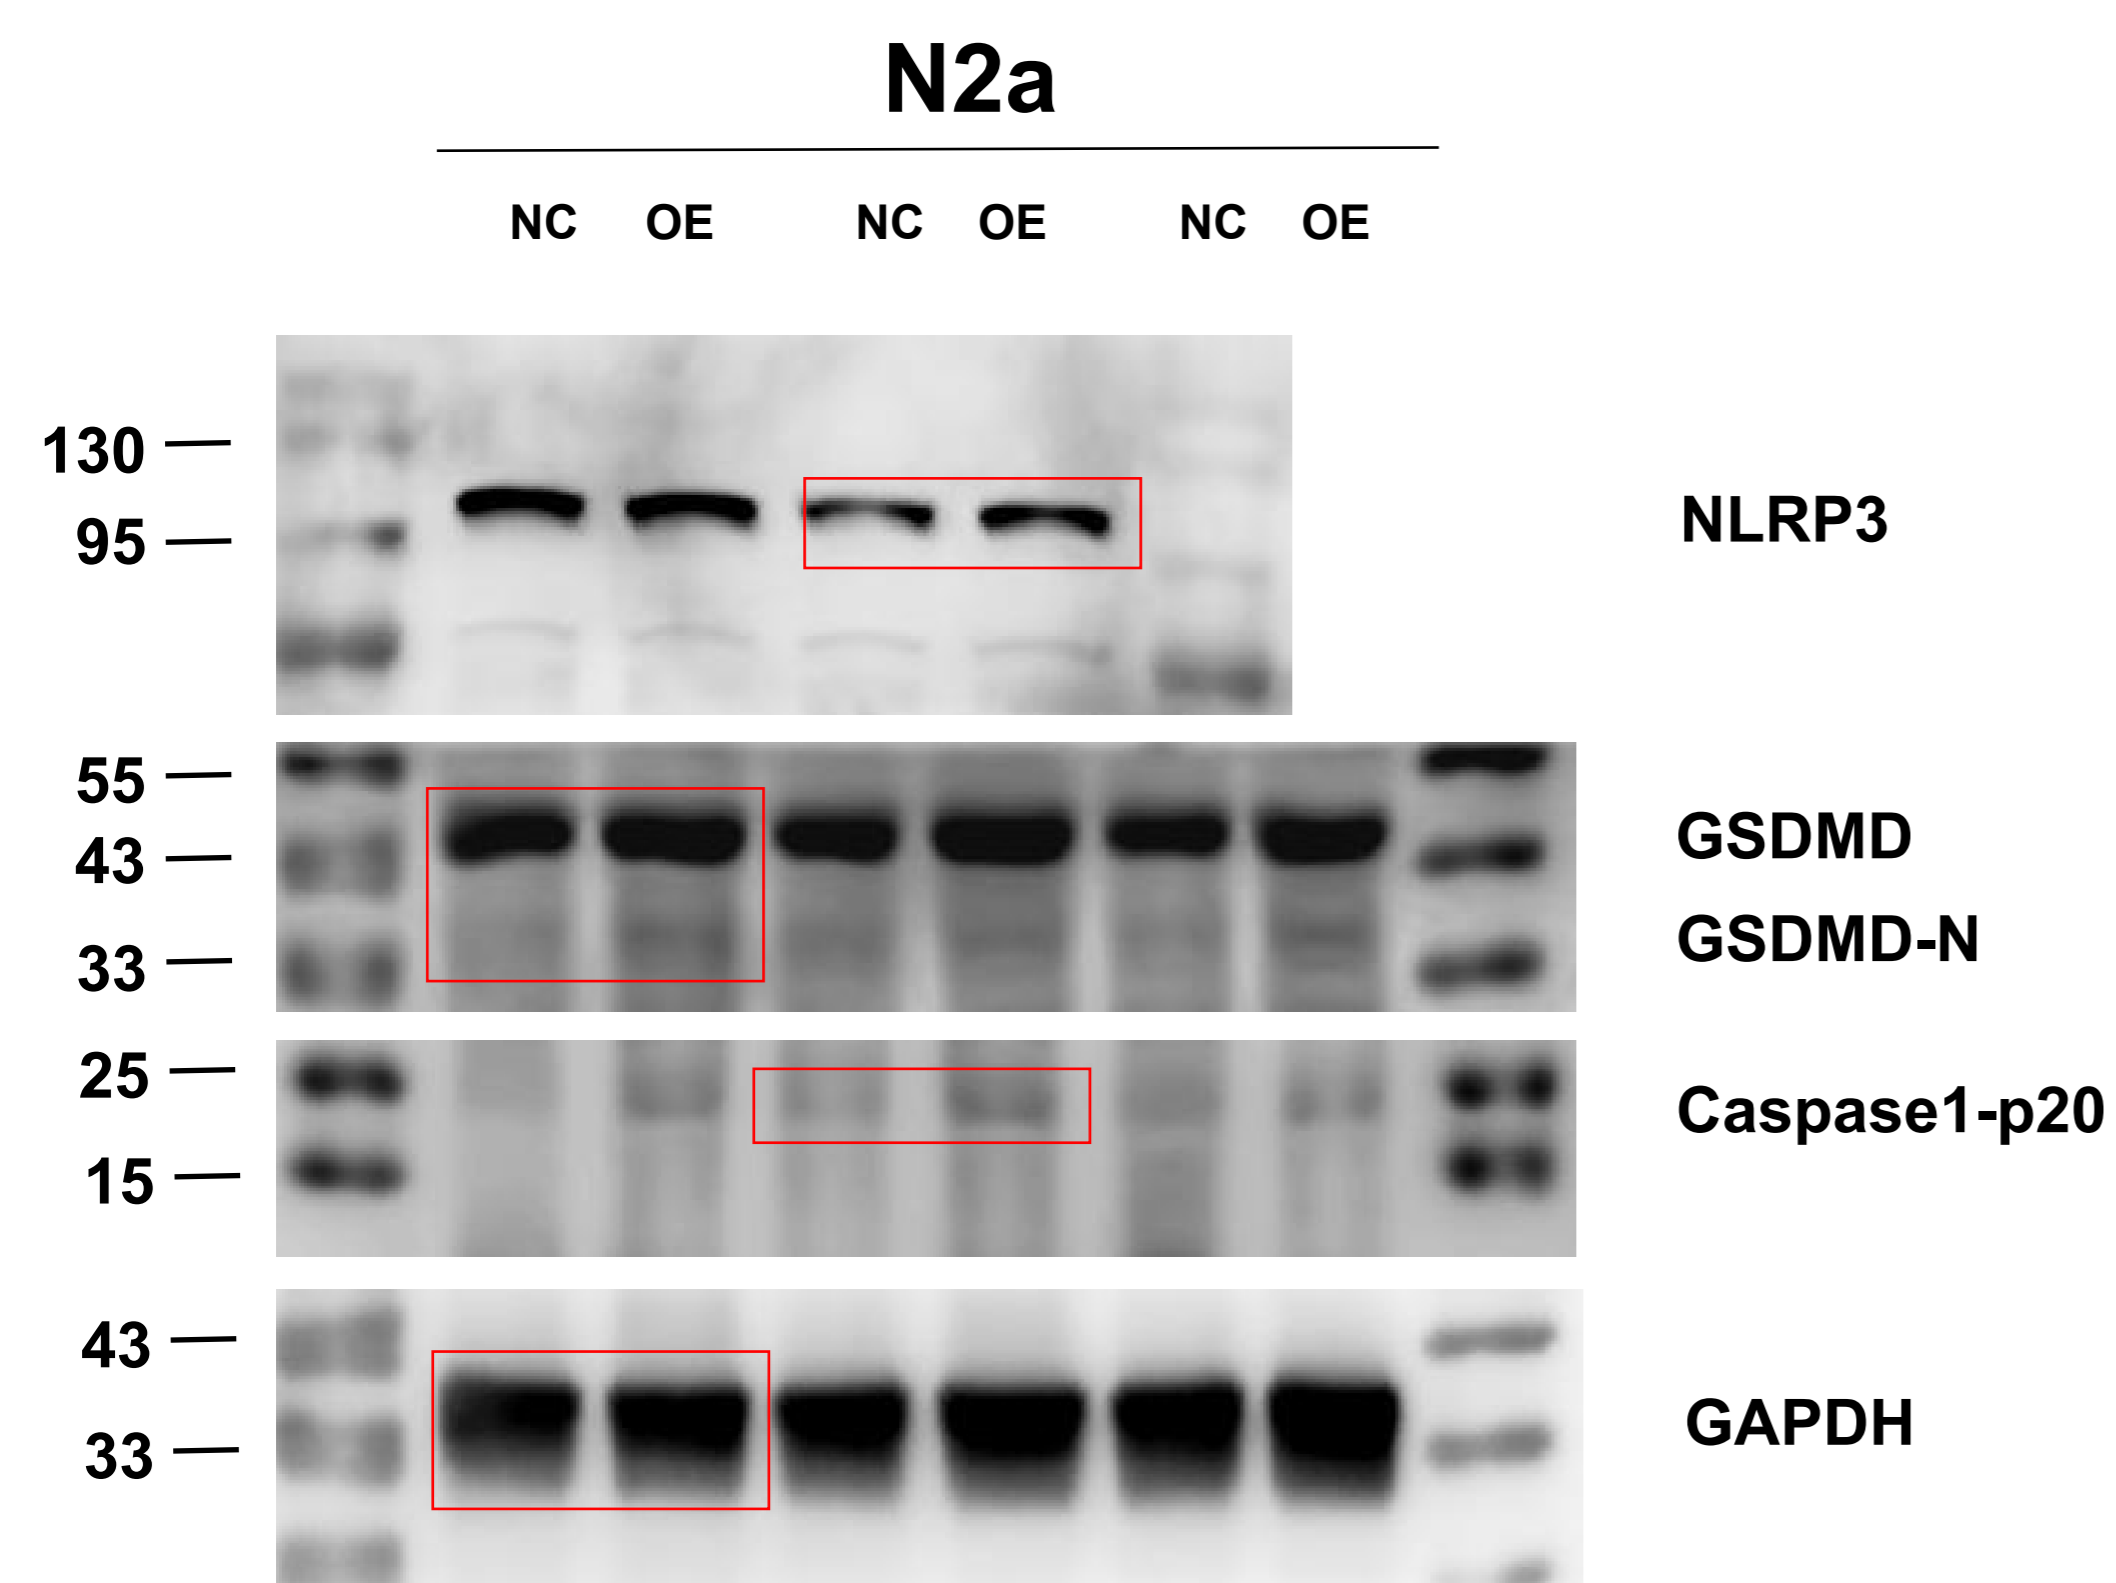



### Figure 3A

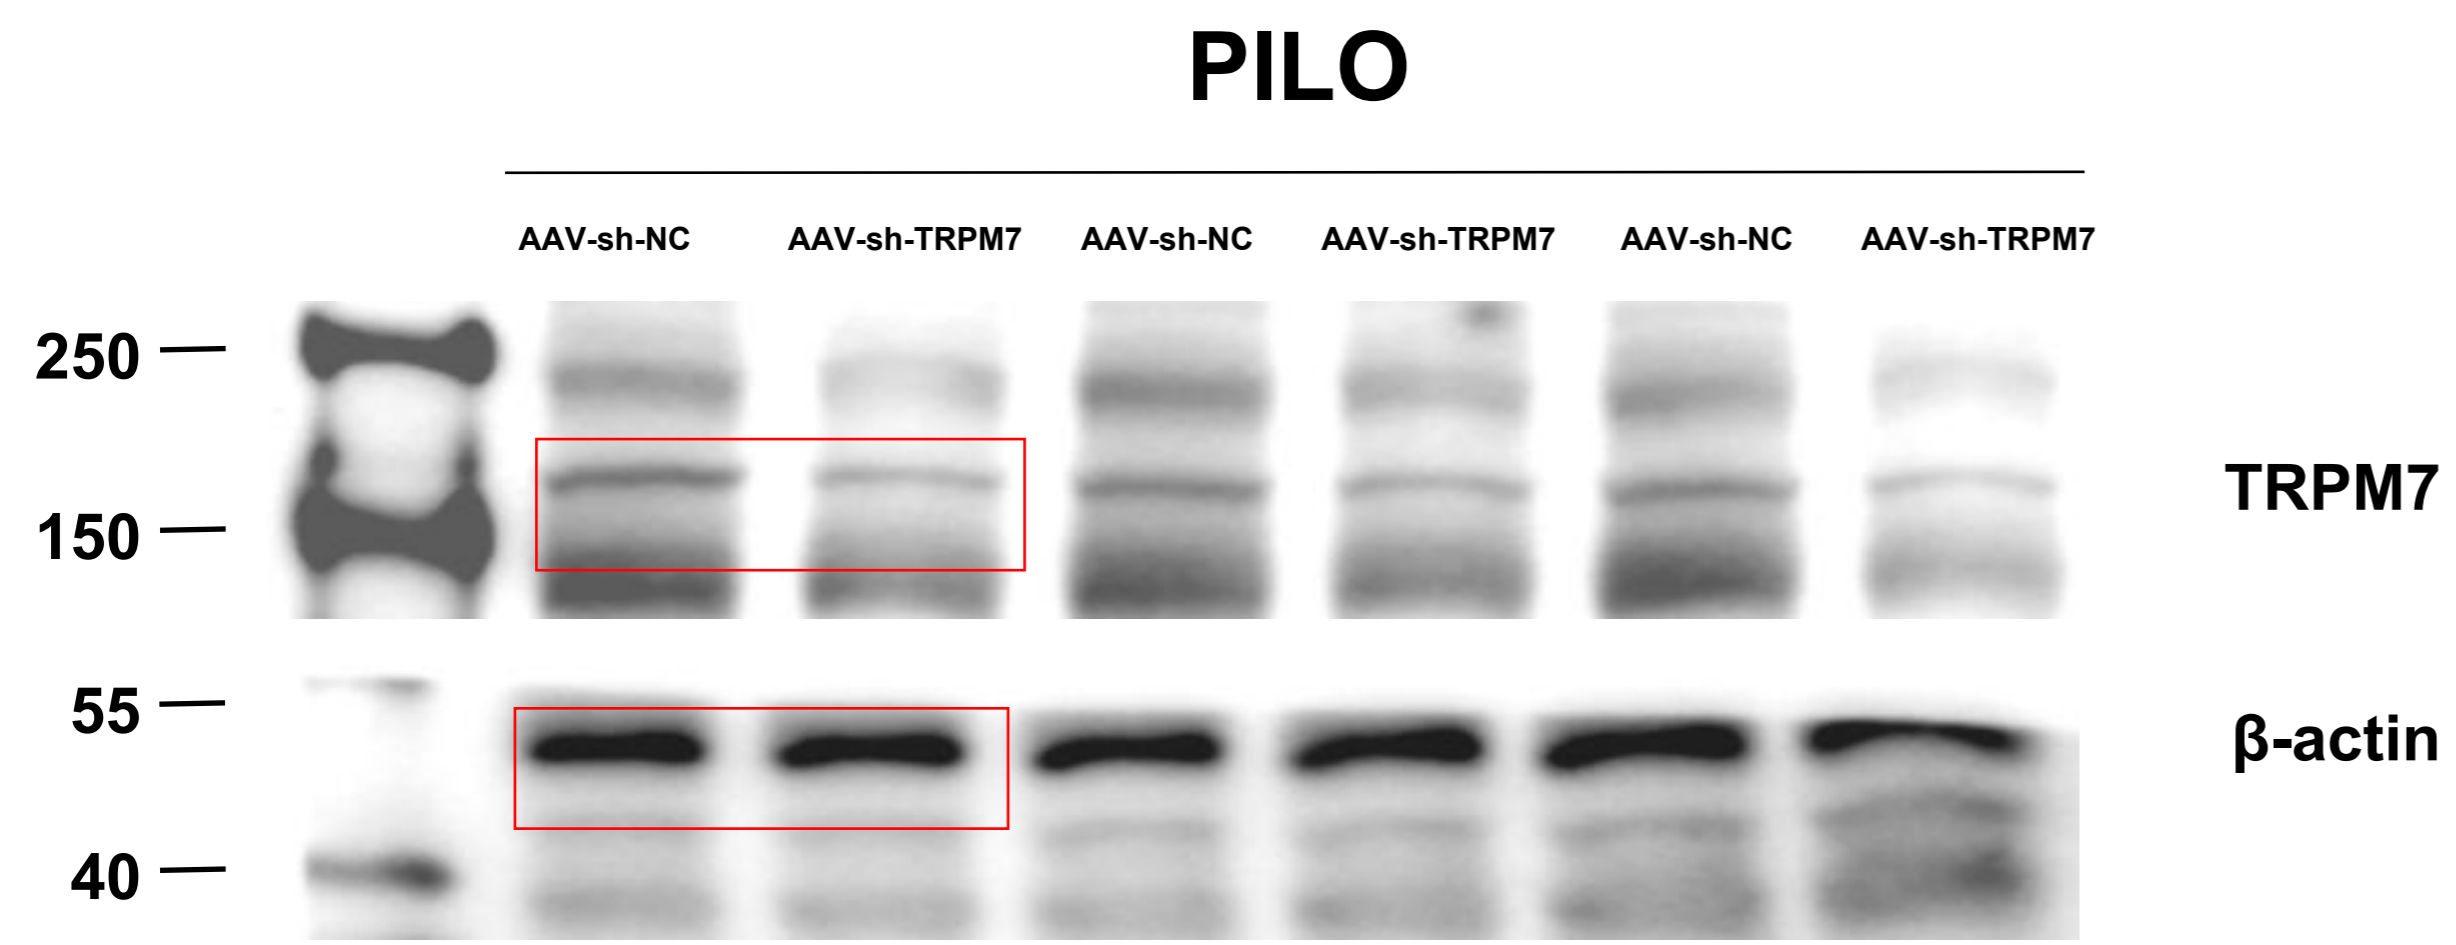

### Figure 3B

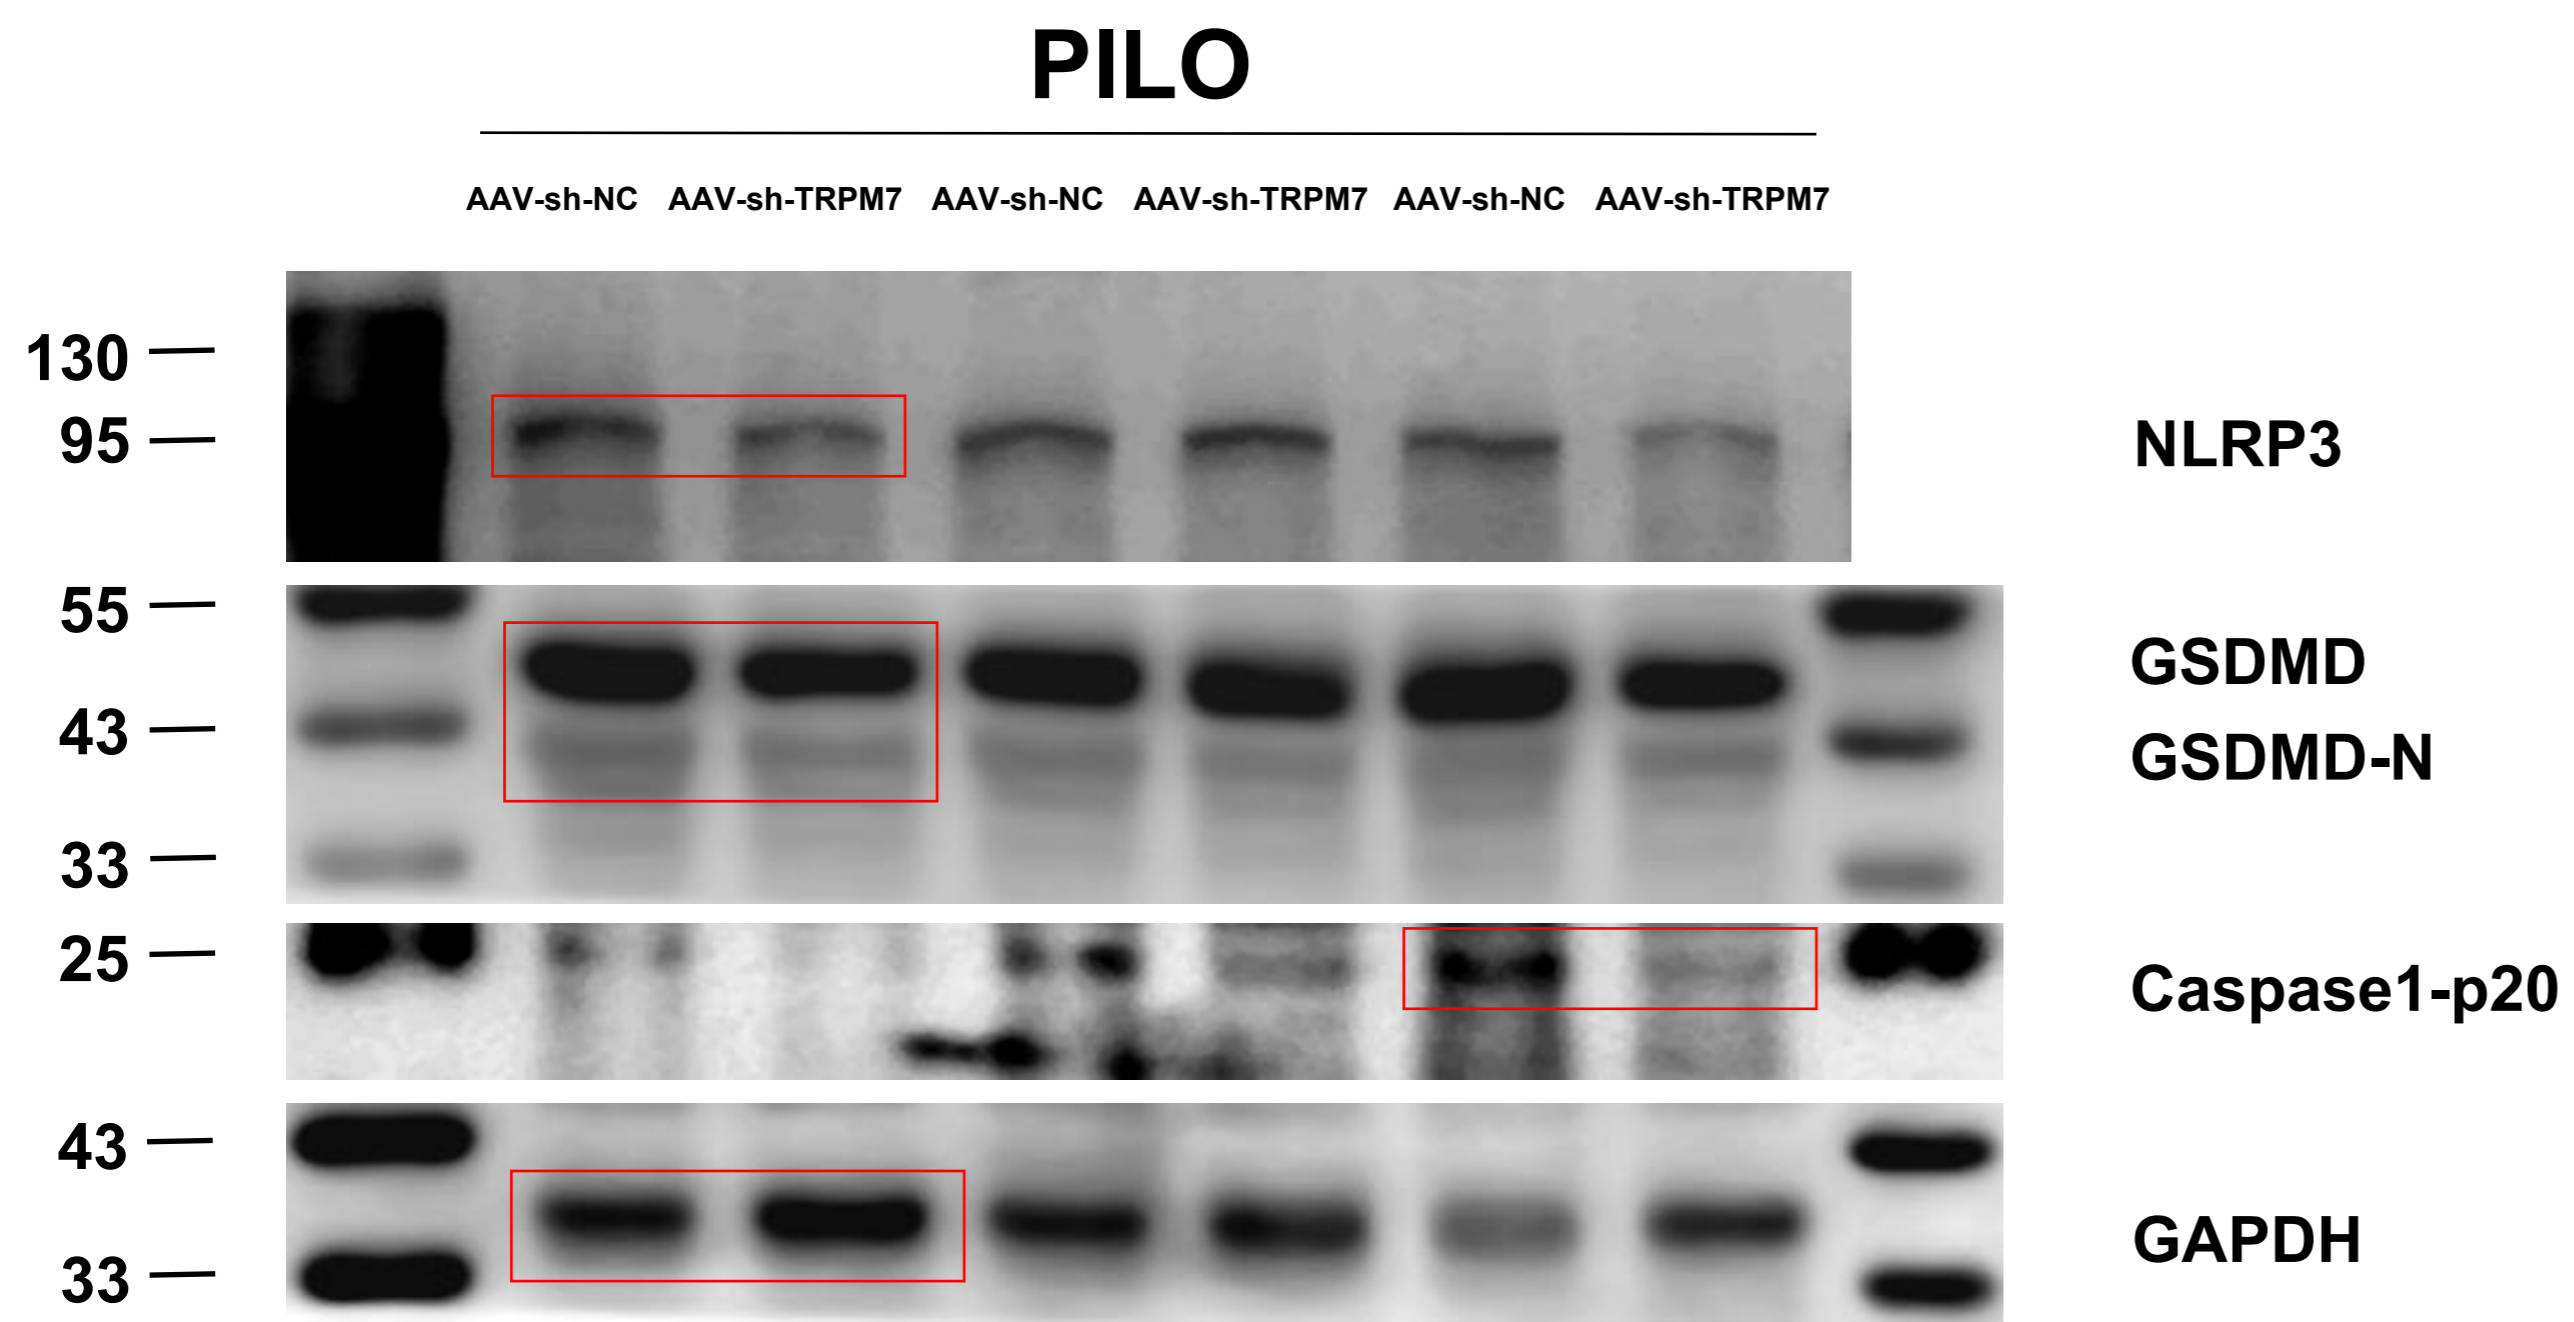

### Figure 3E

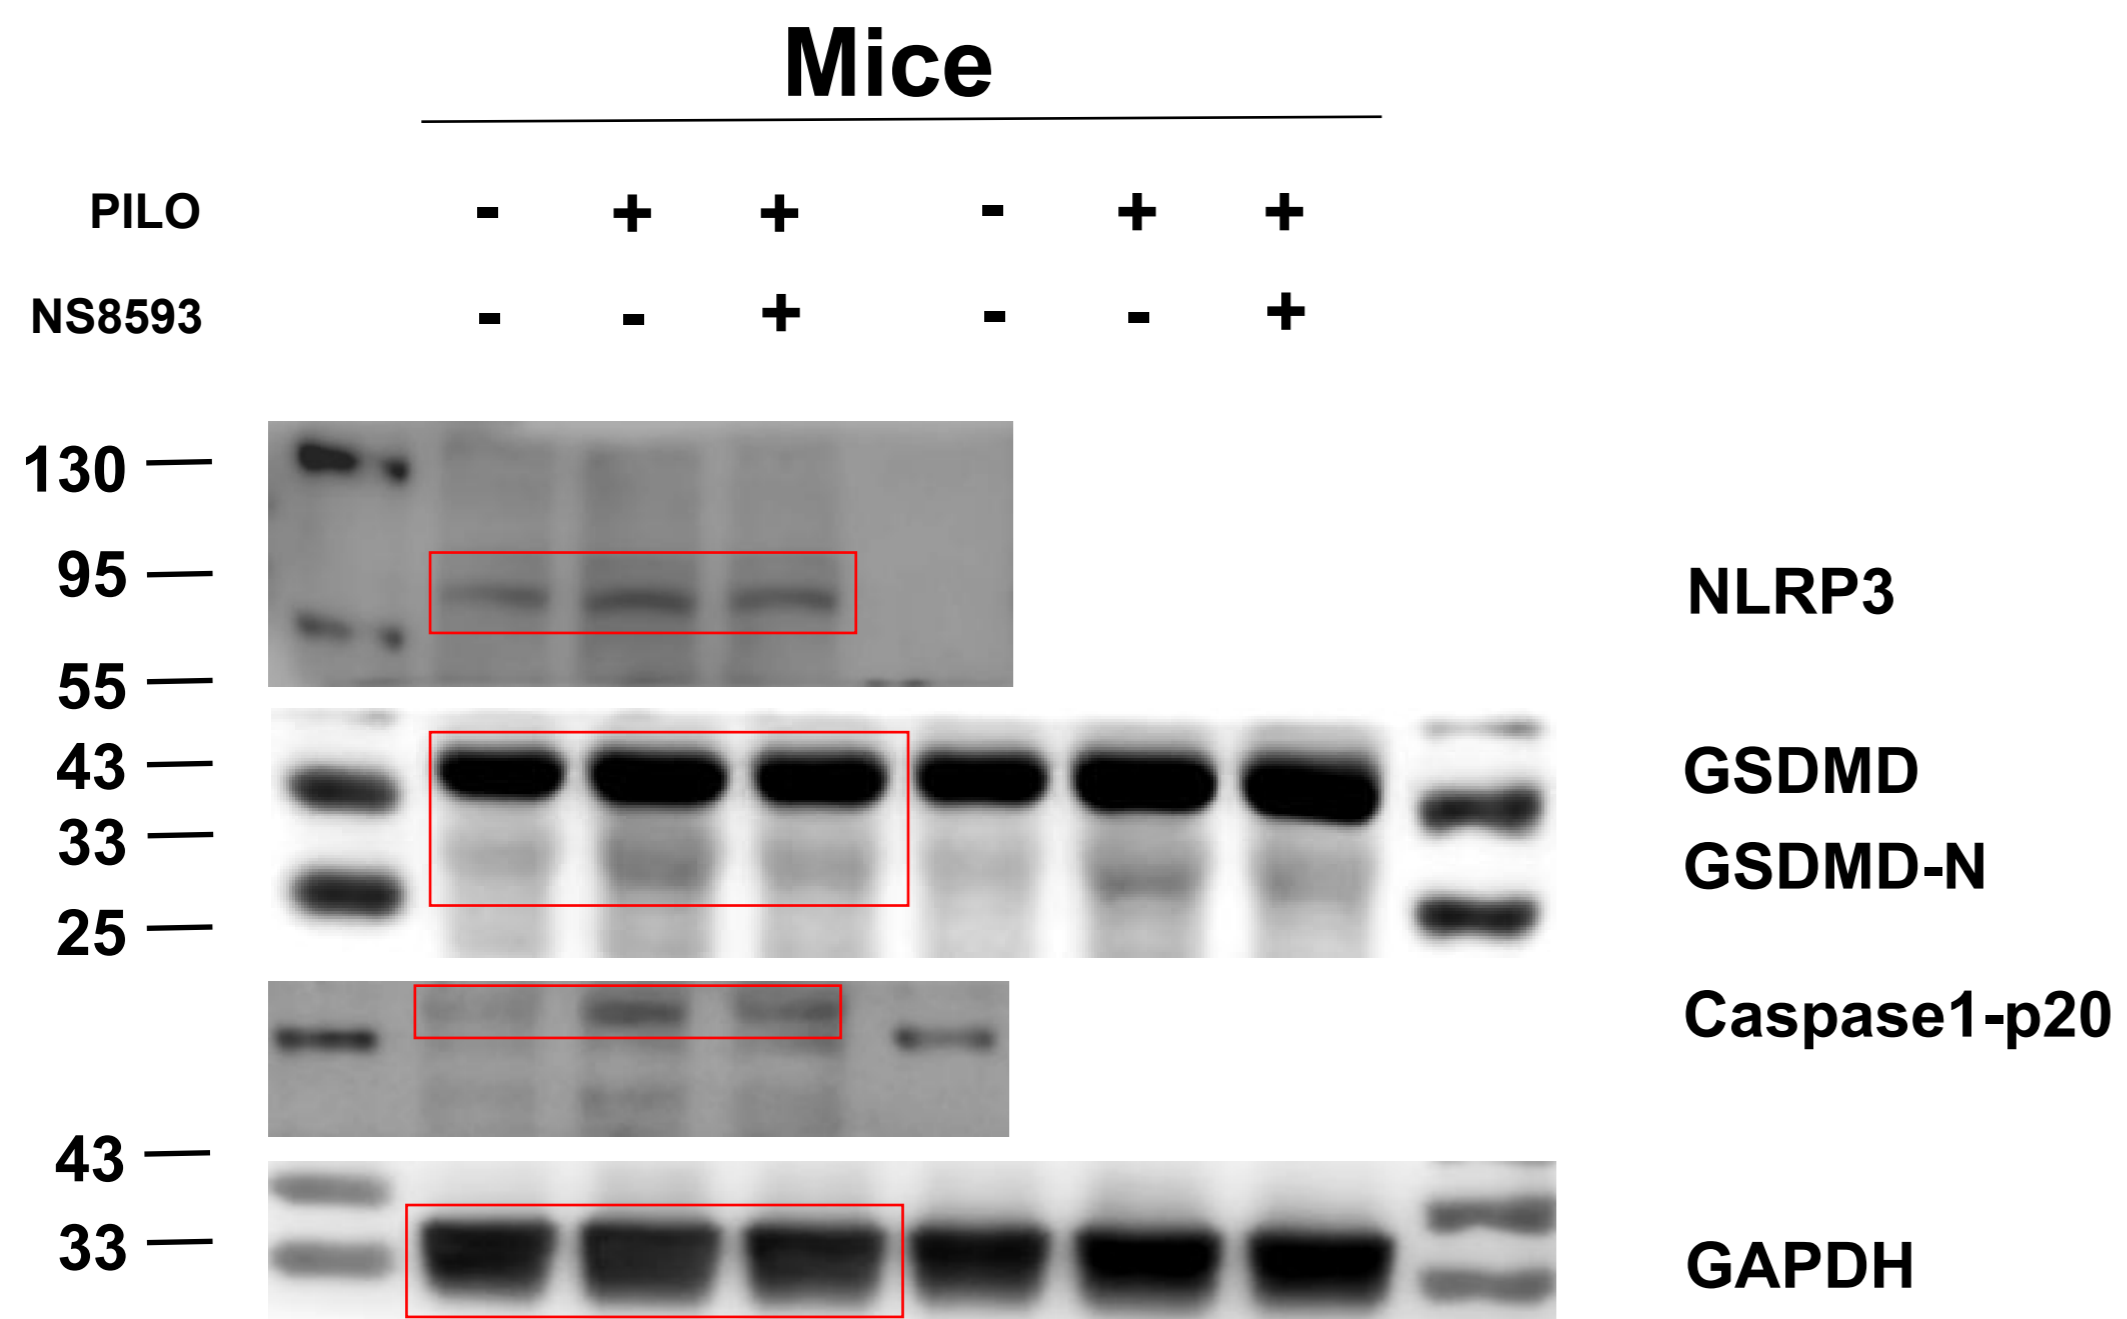

**Figure 4C**

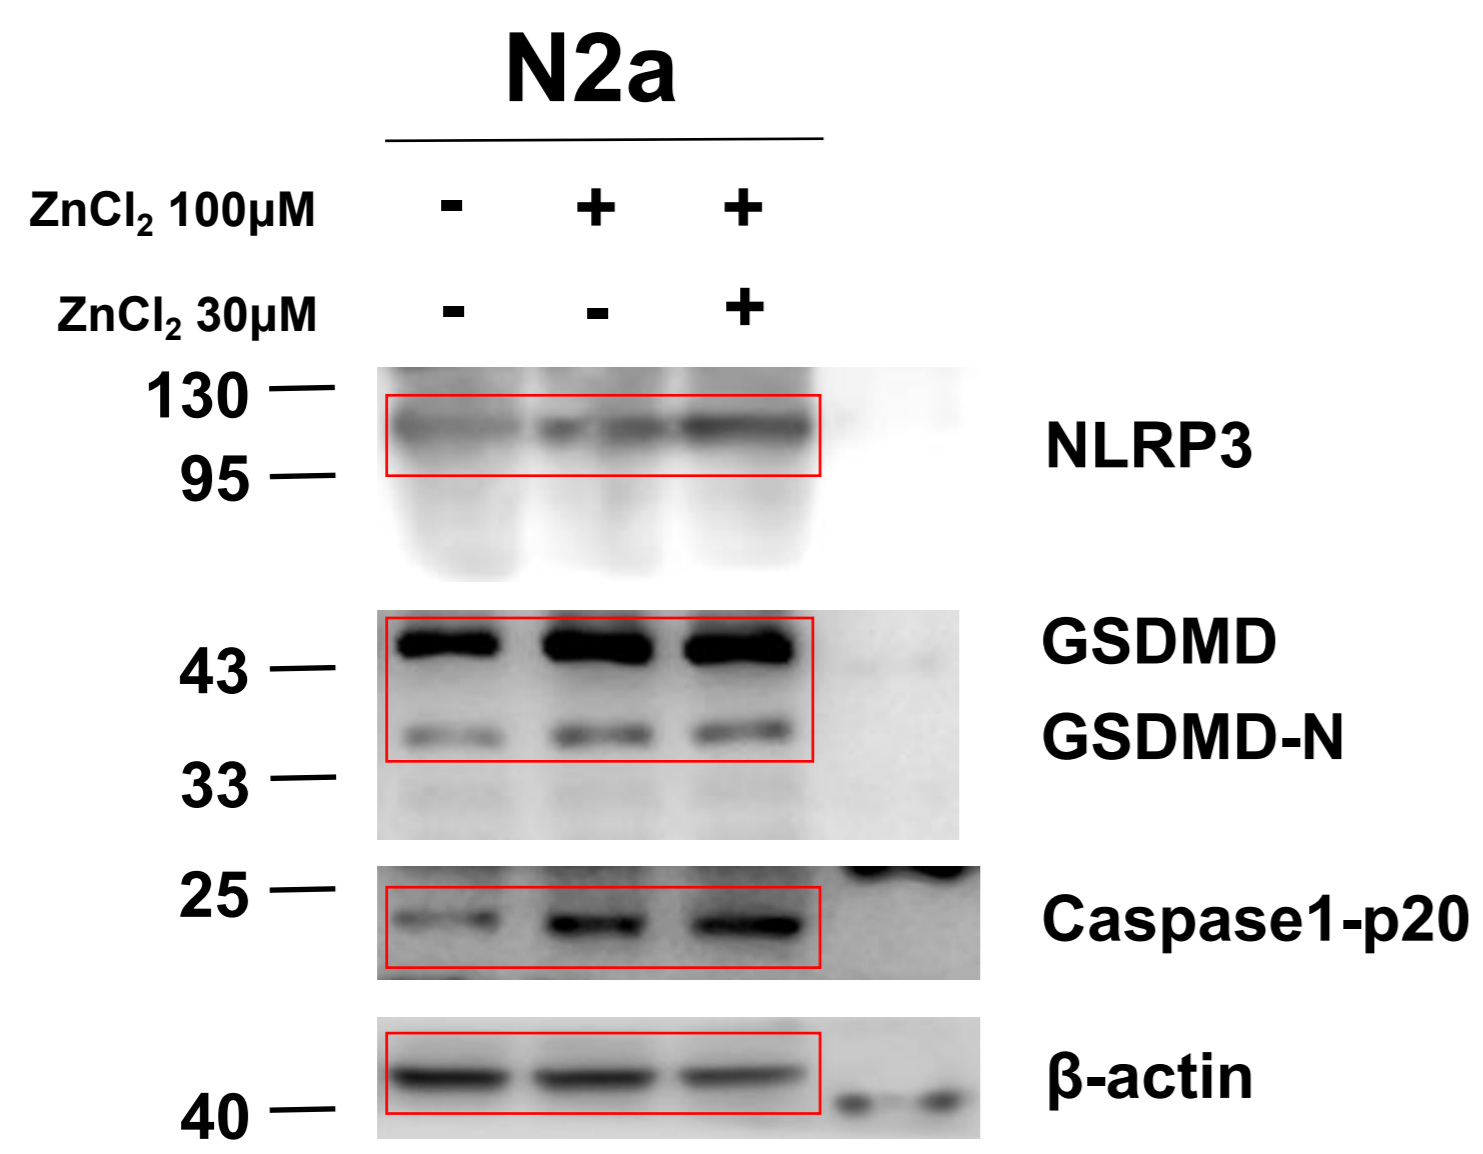

**Figure 5B**

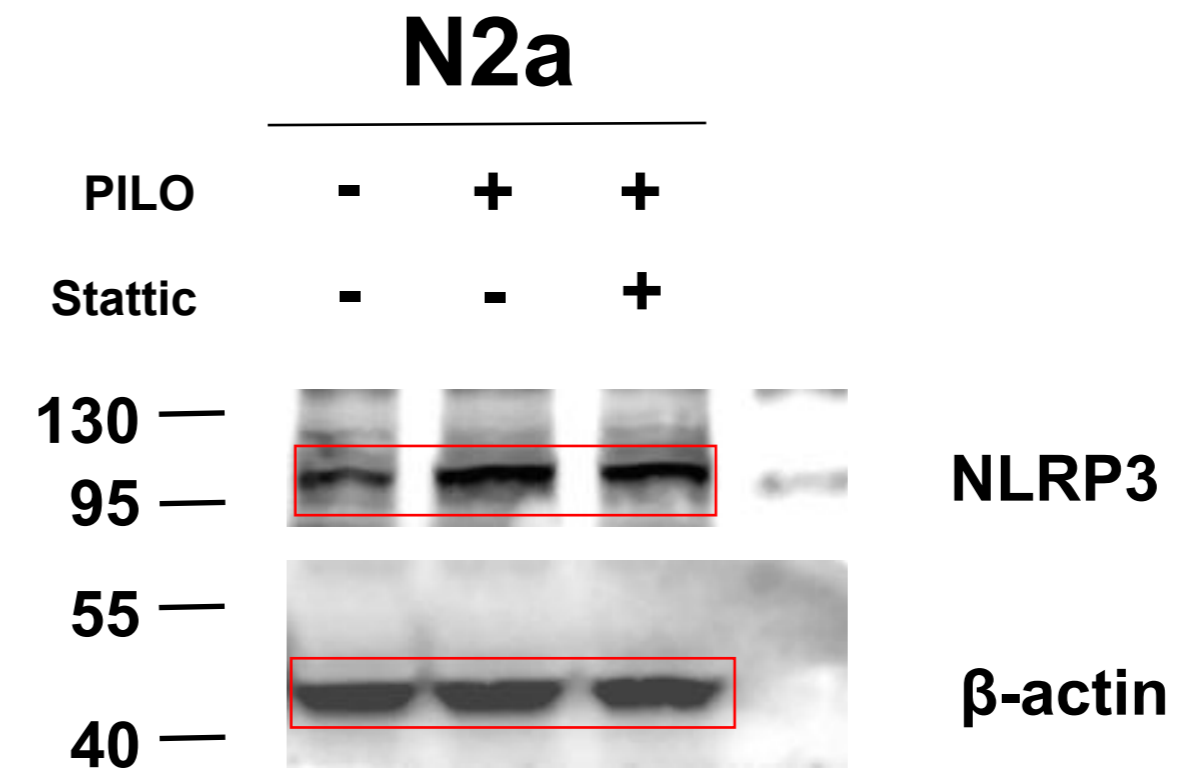

**Figure 4D**

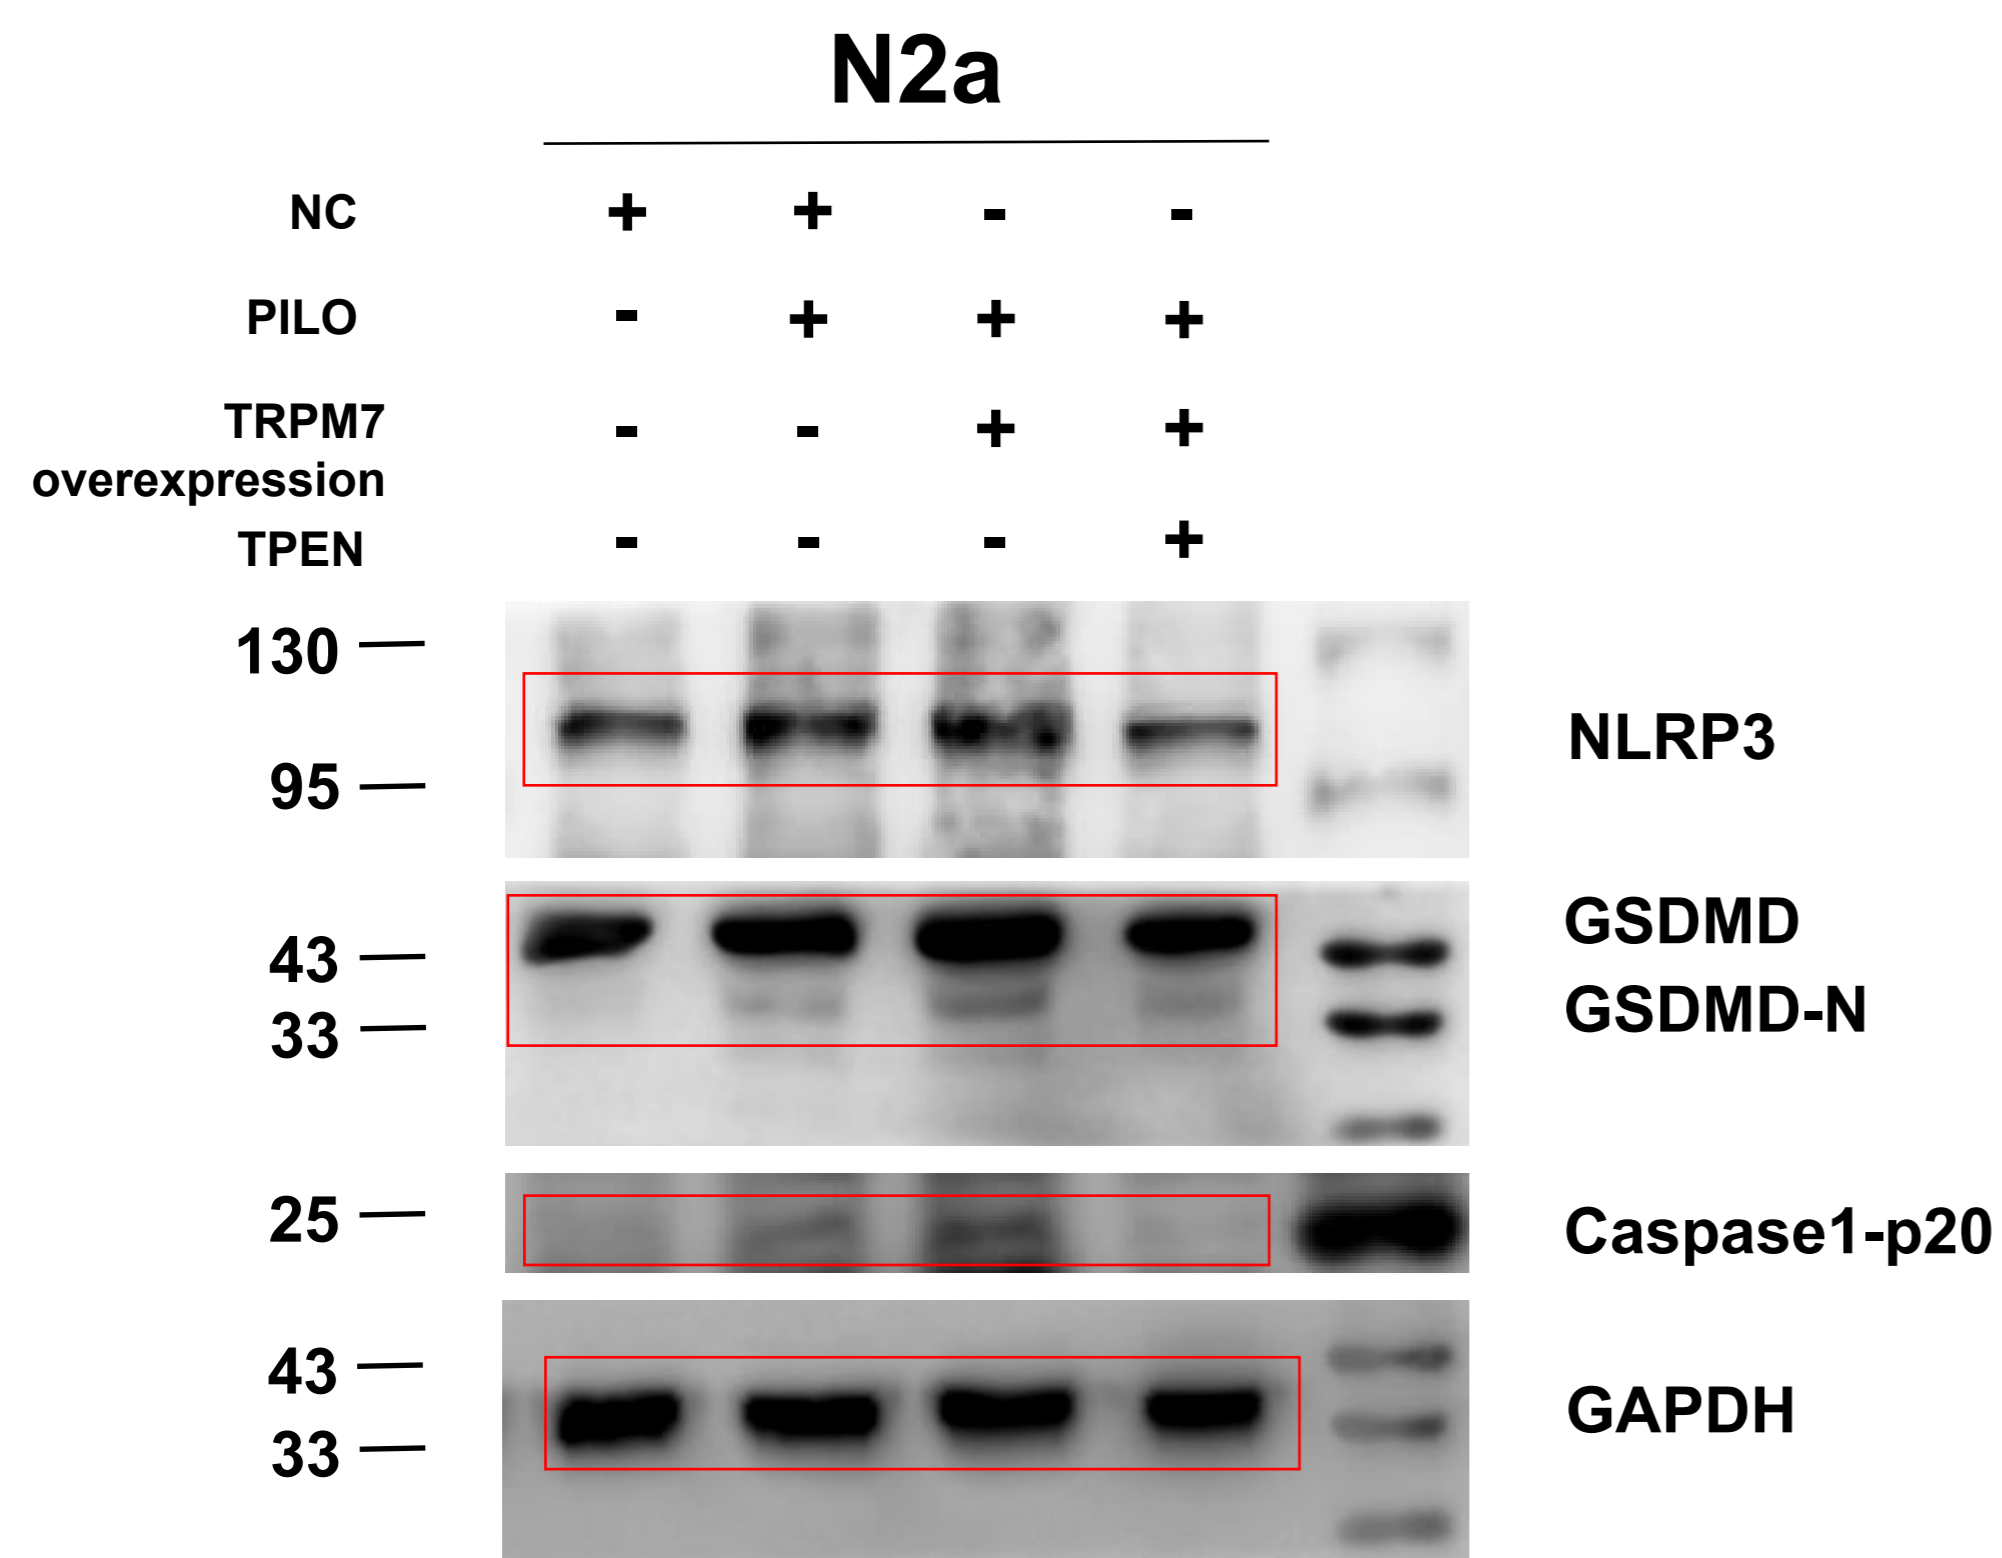

**Figure 6A**

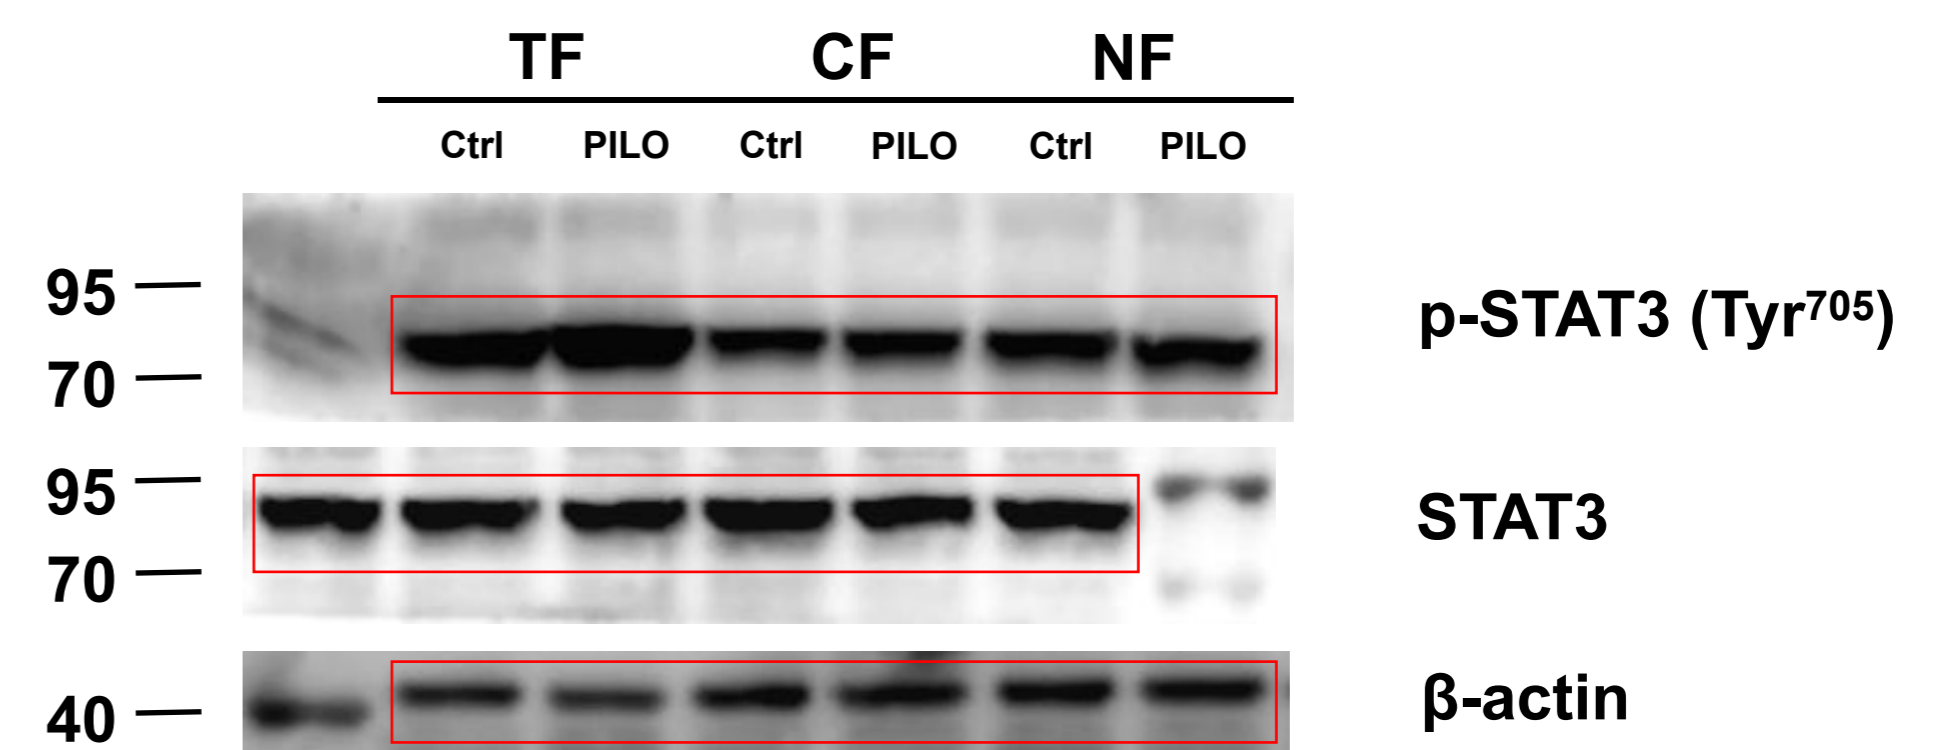

**Figure 4E**

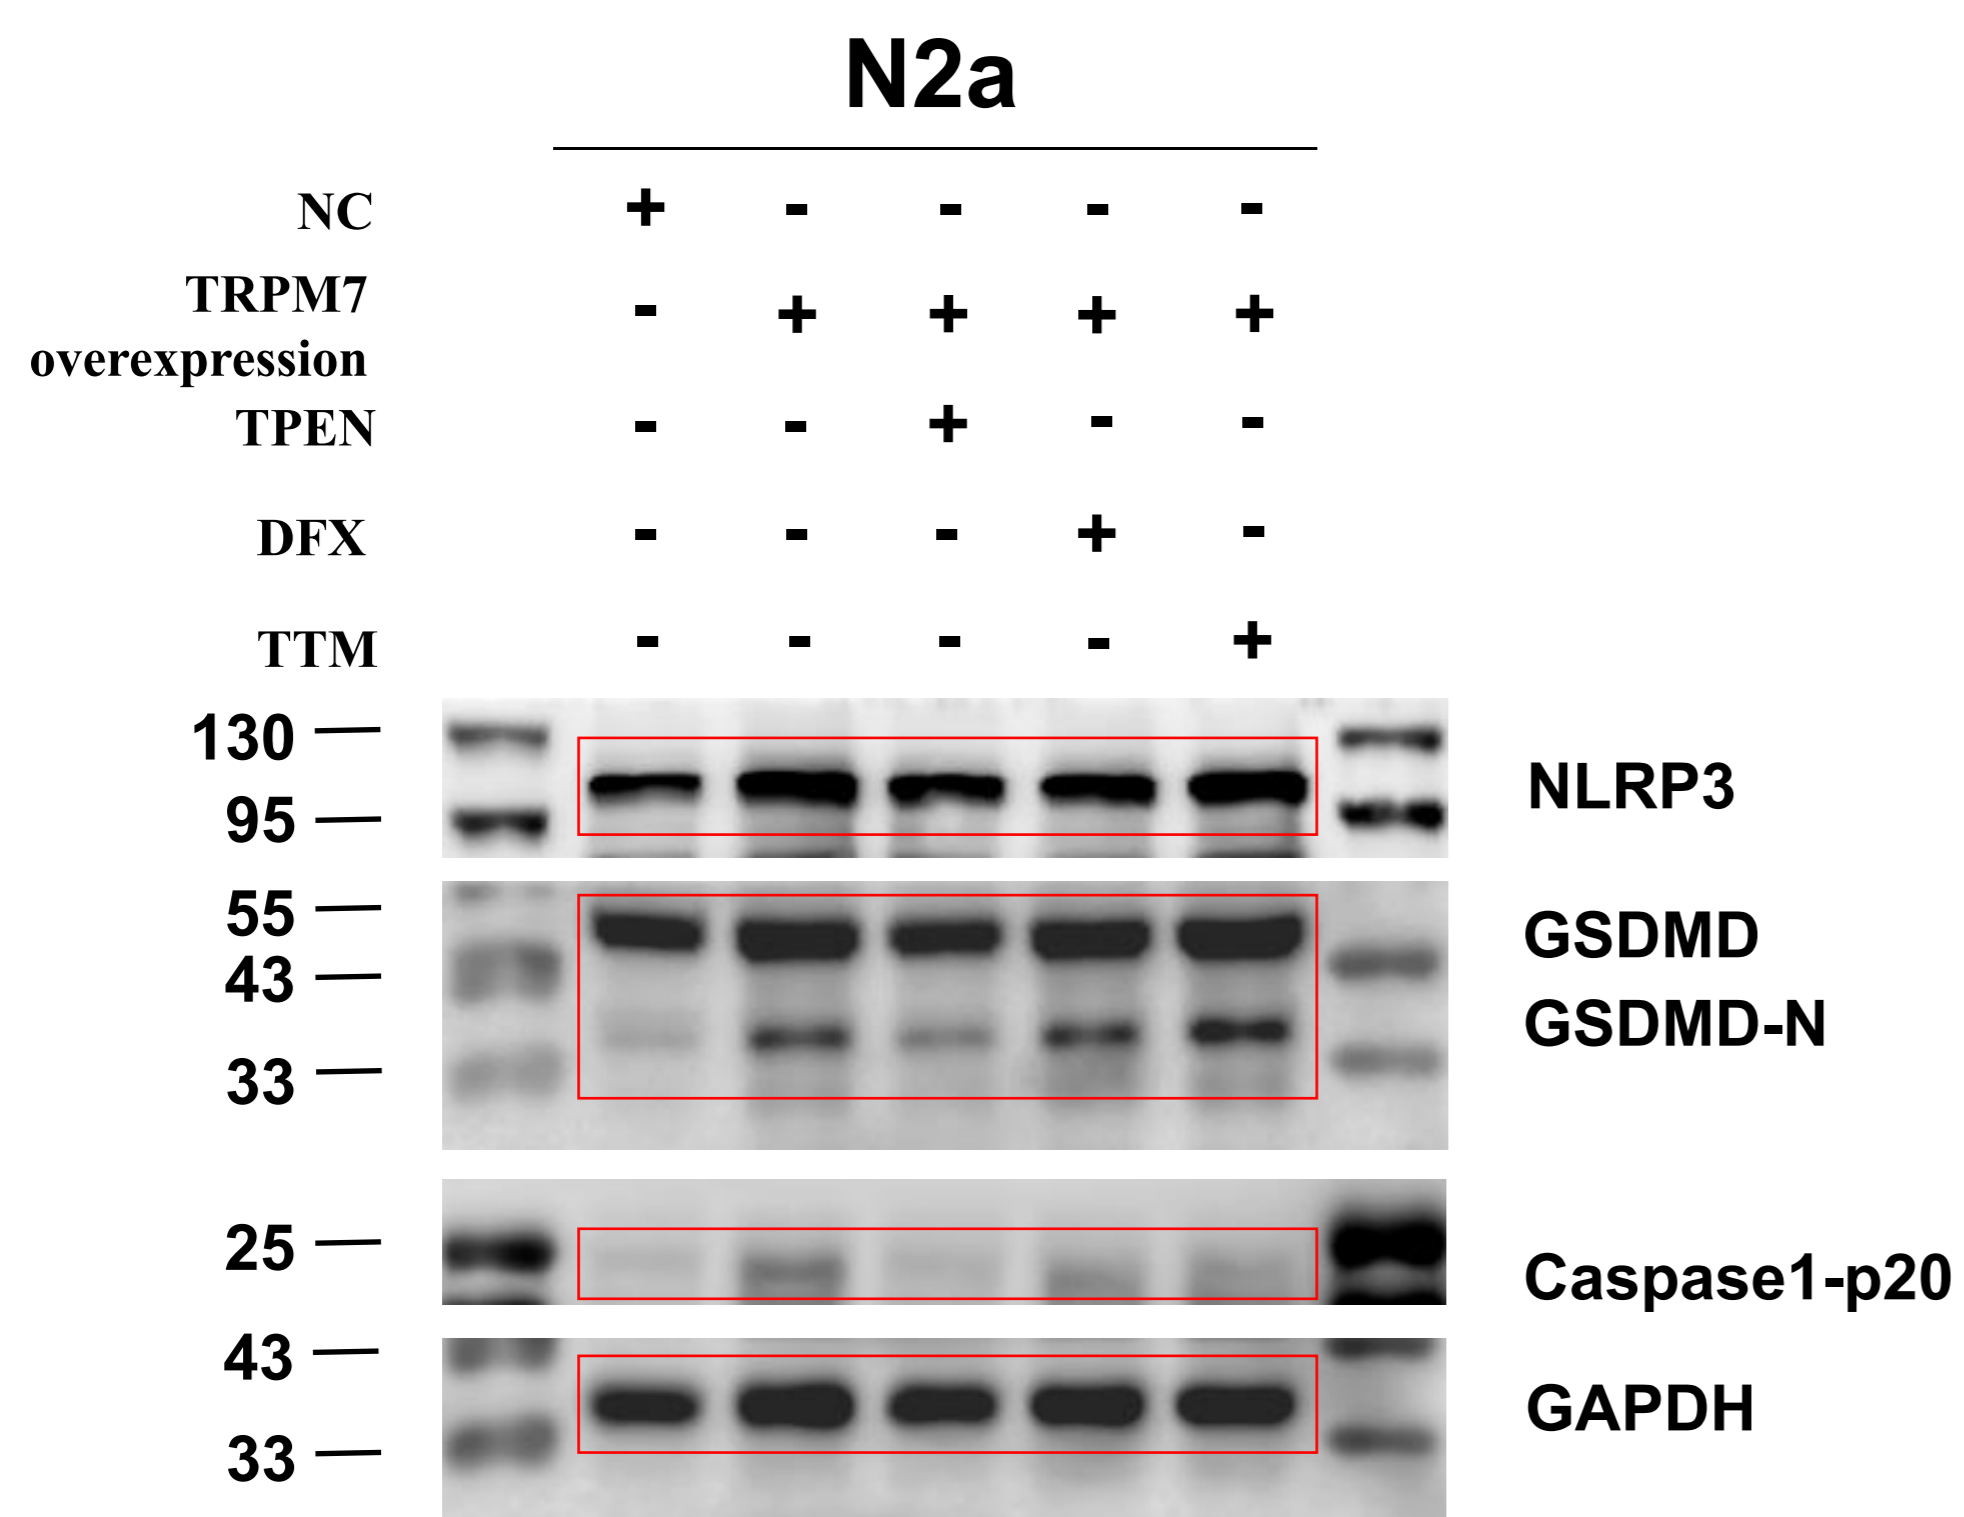

**Figure 6C**

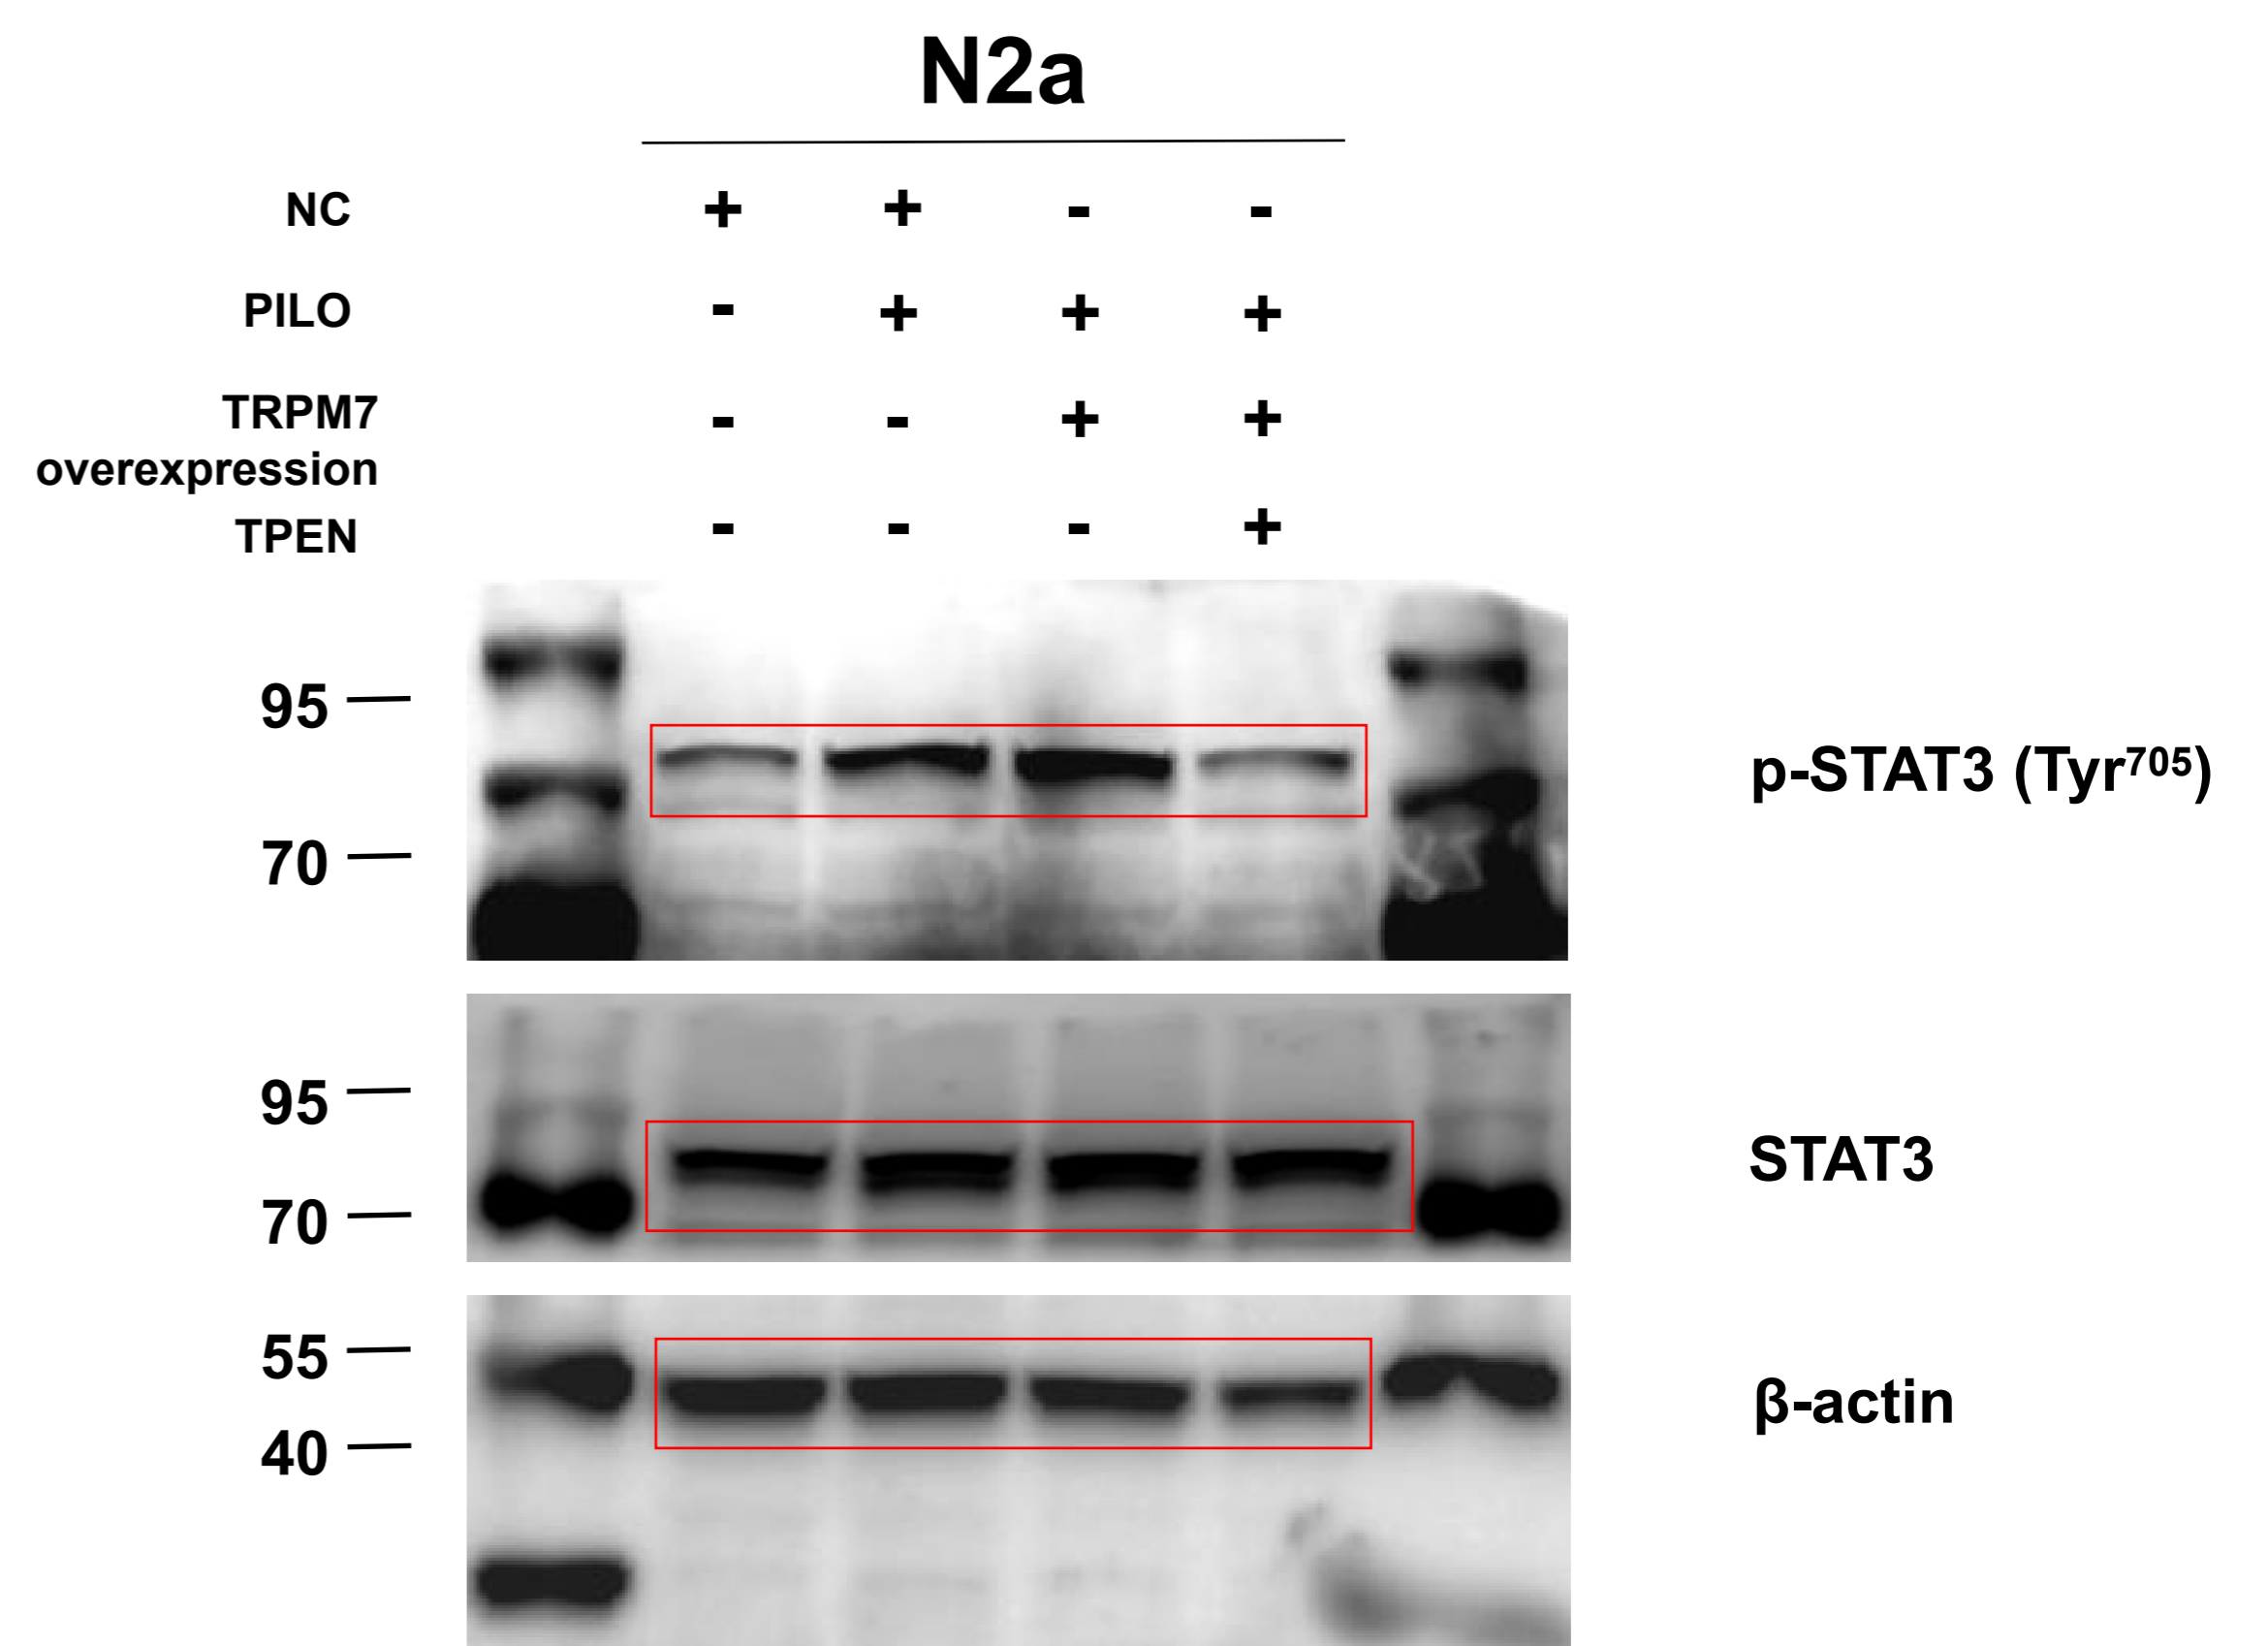

**Figure 6E**

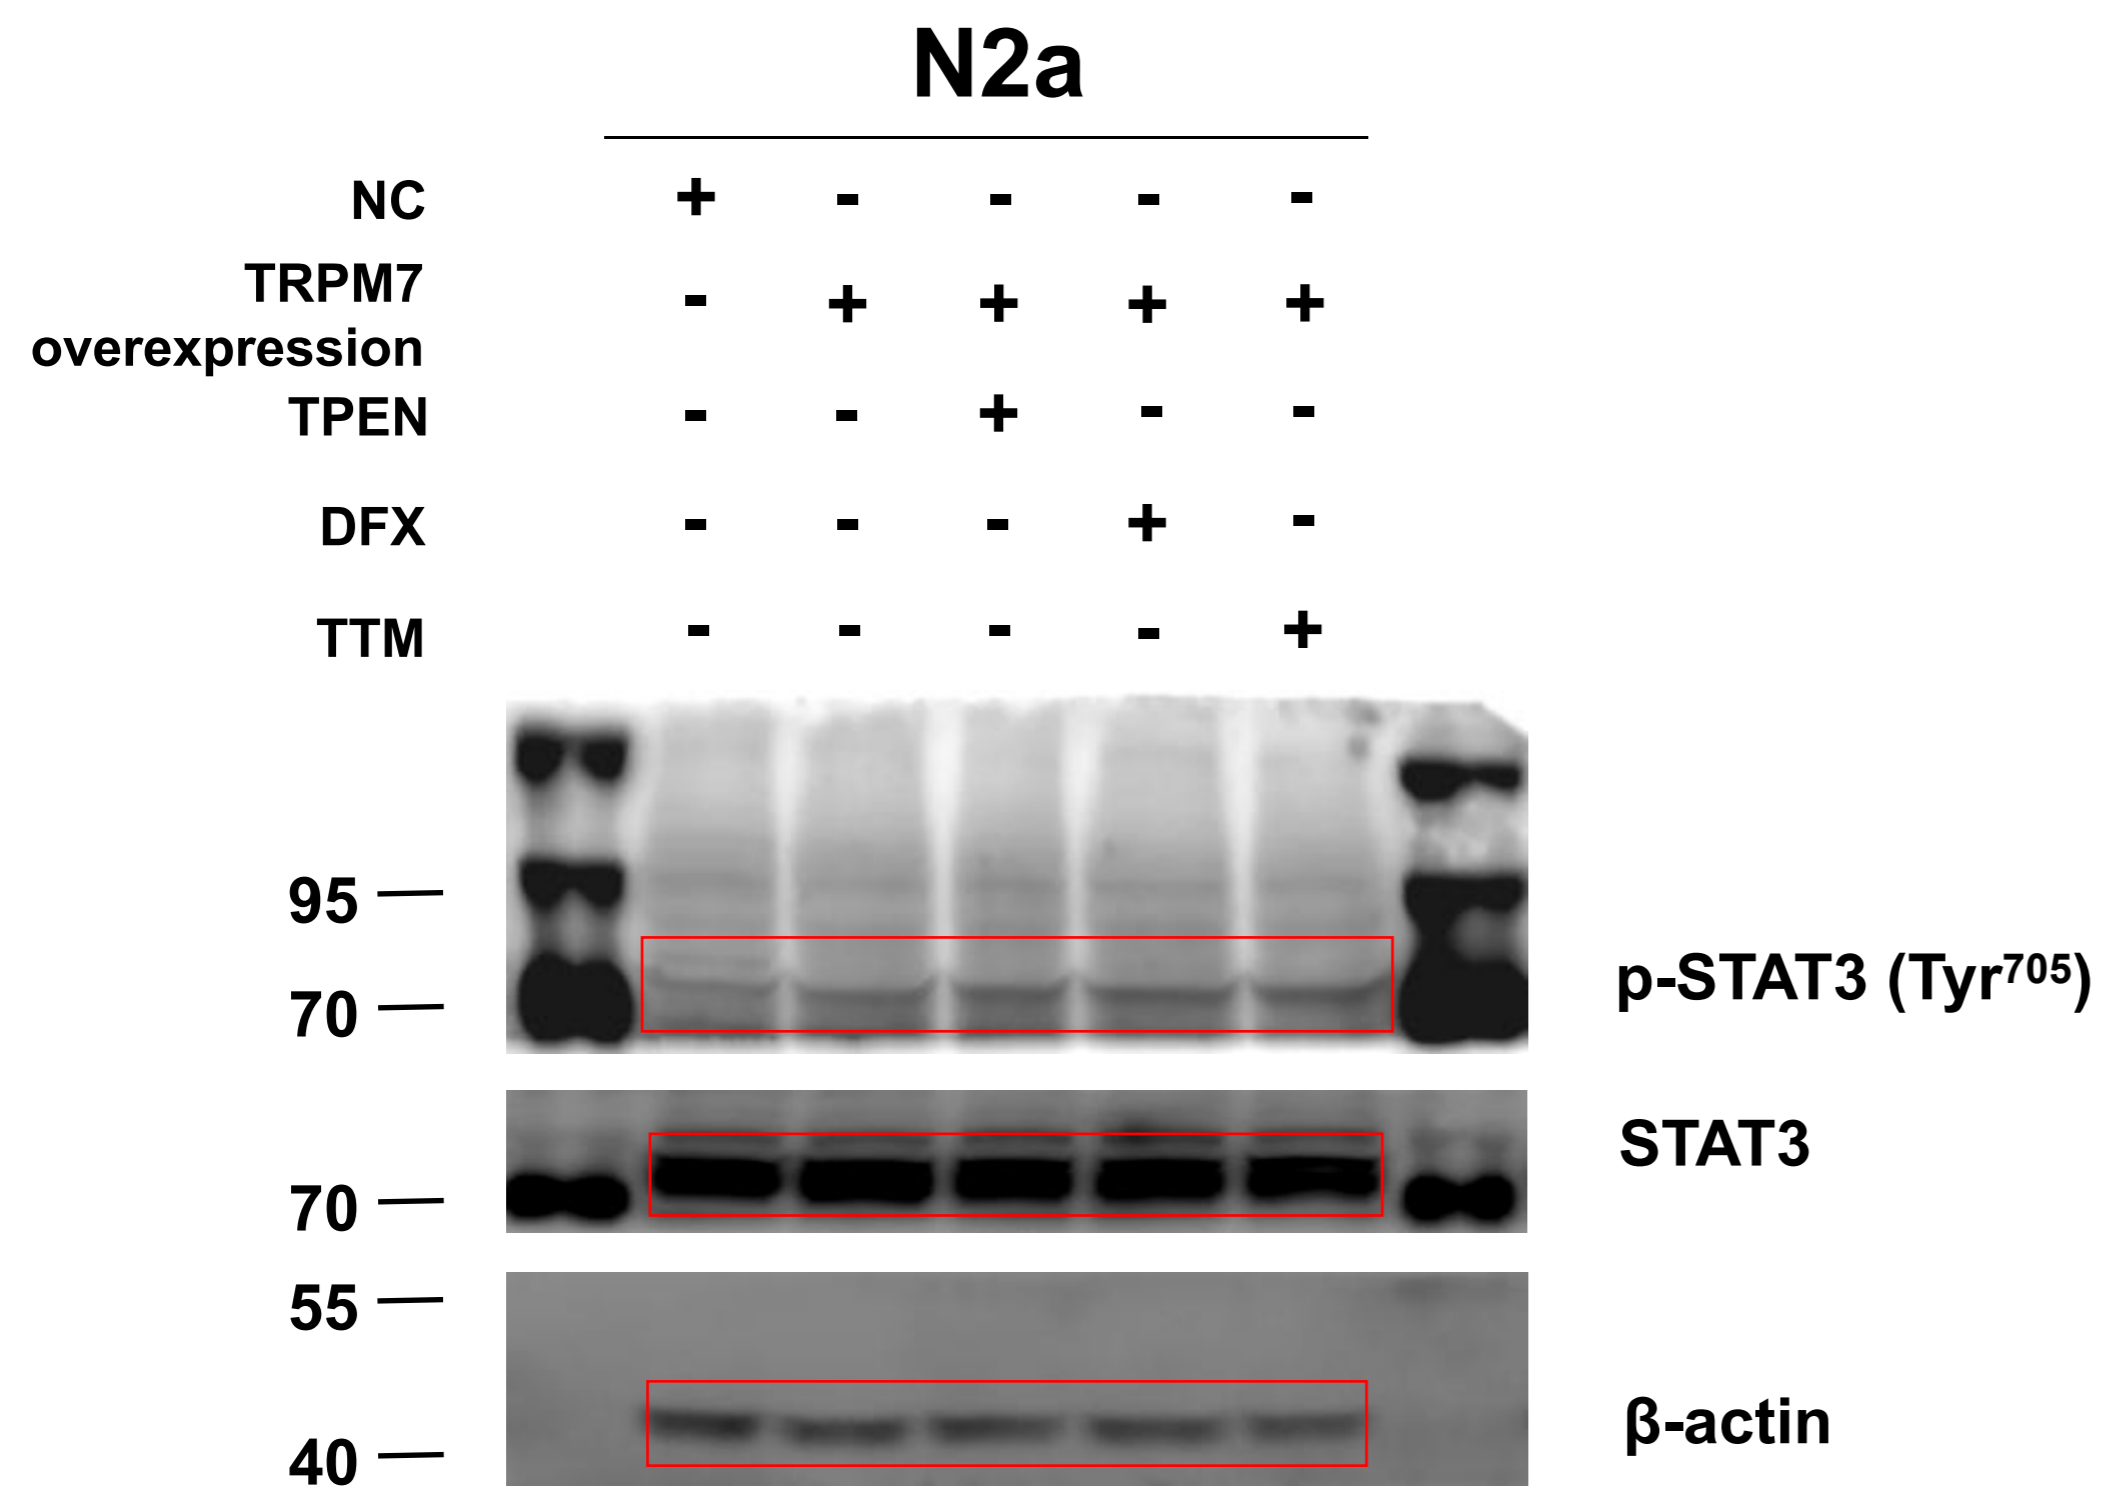

**Figure 6M**

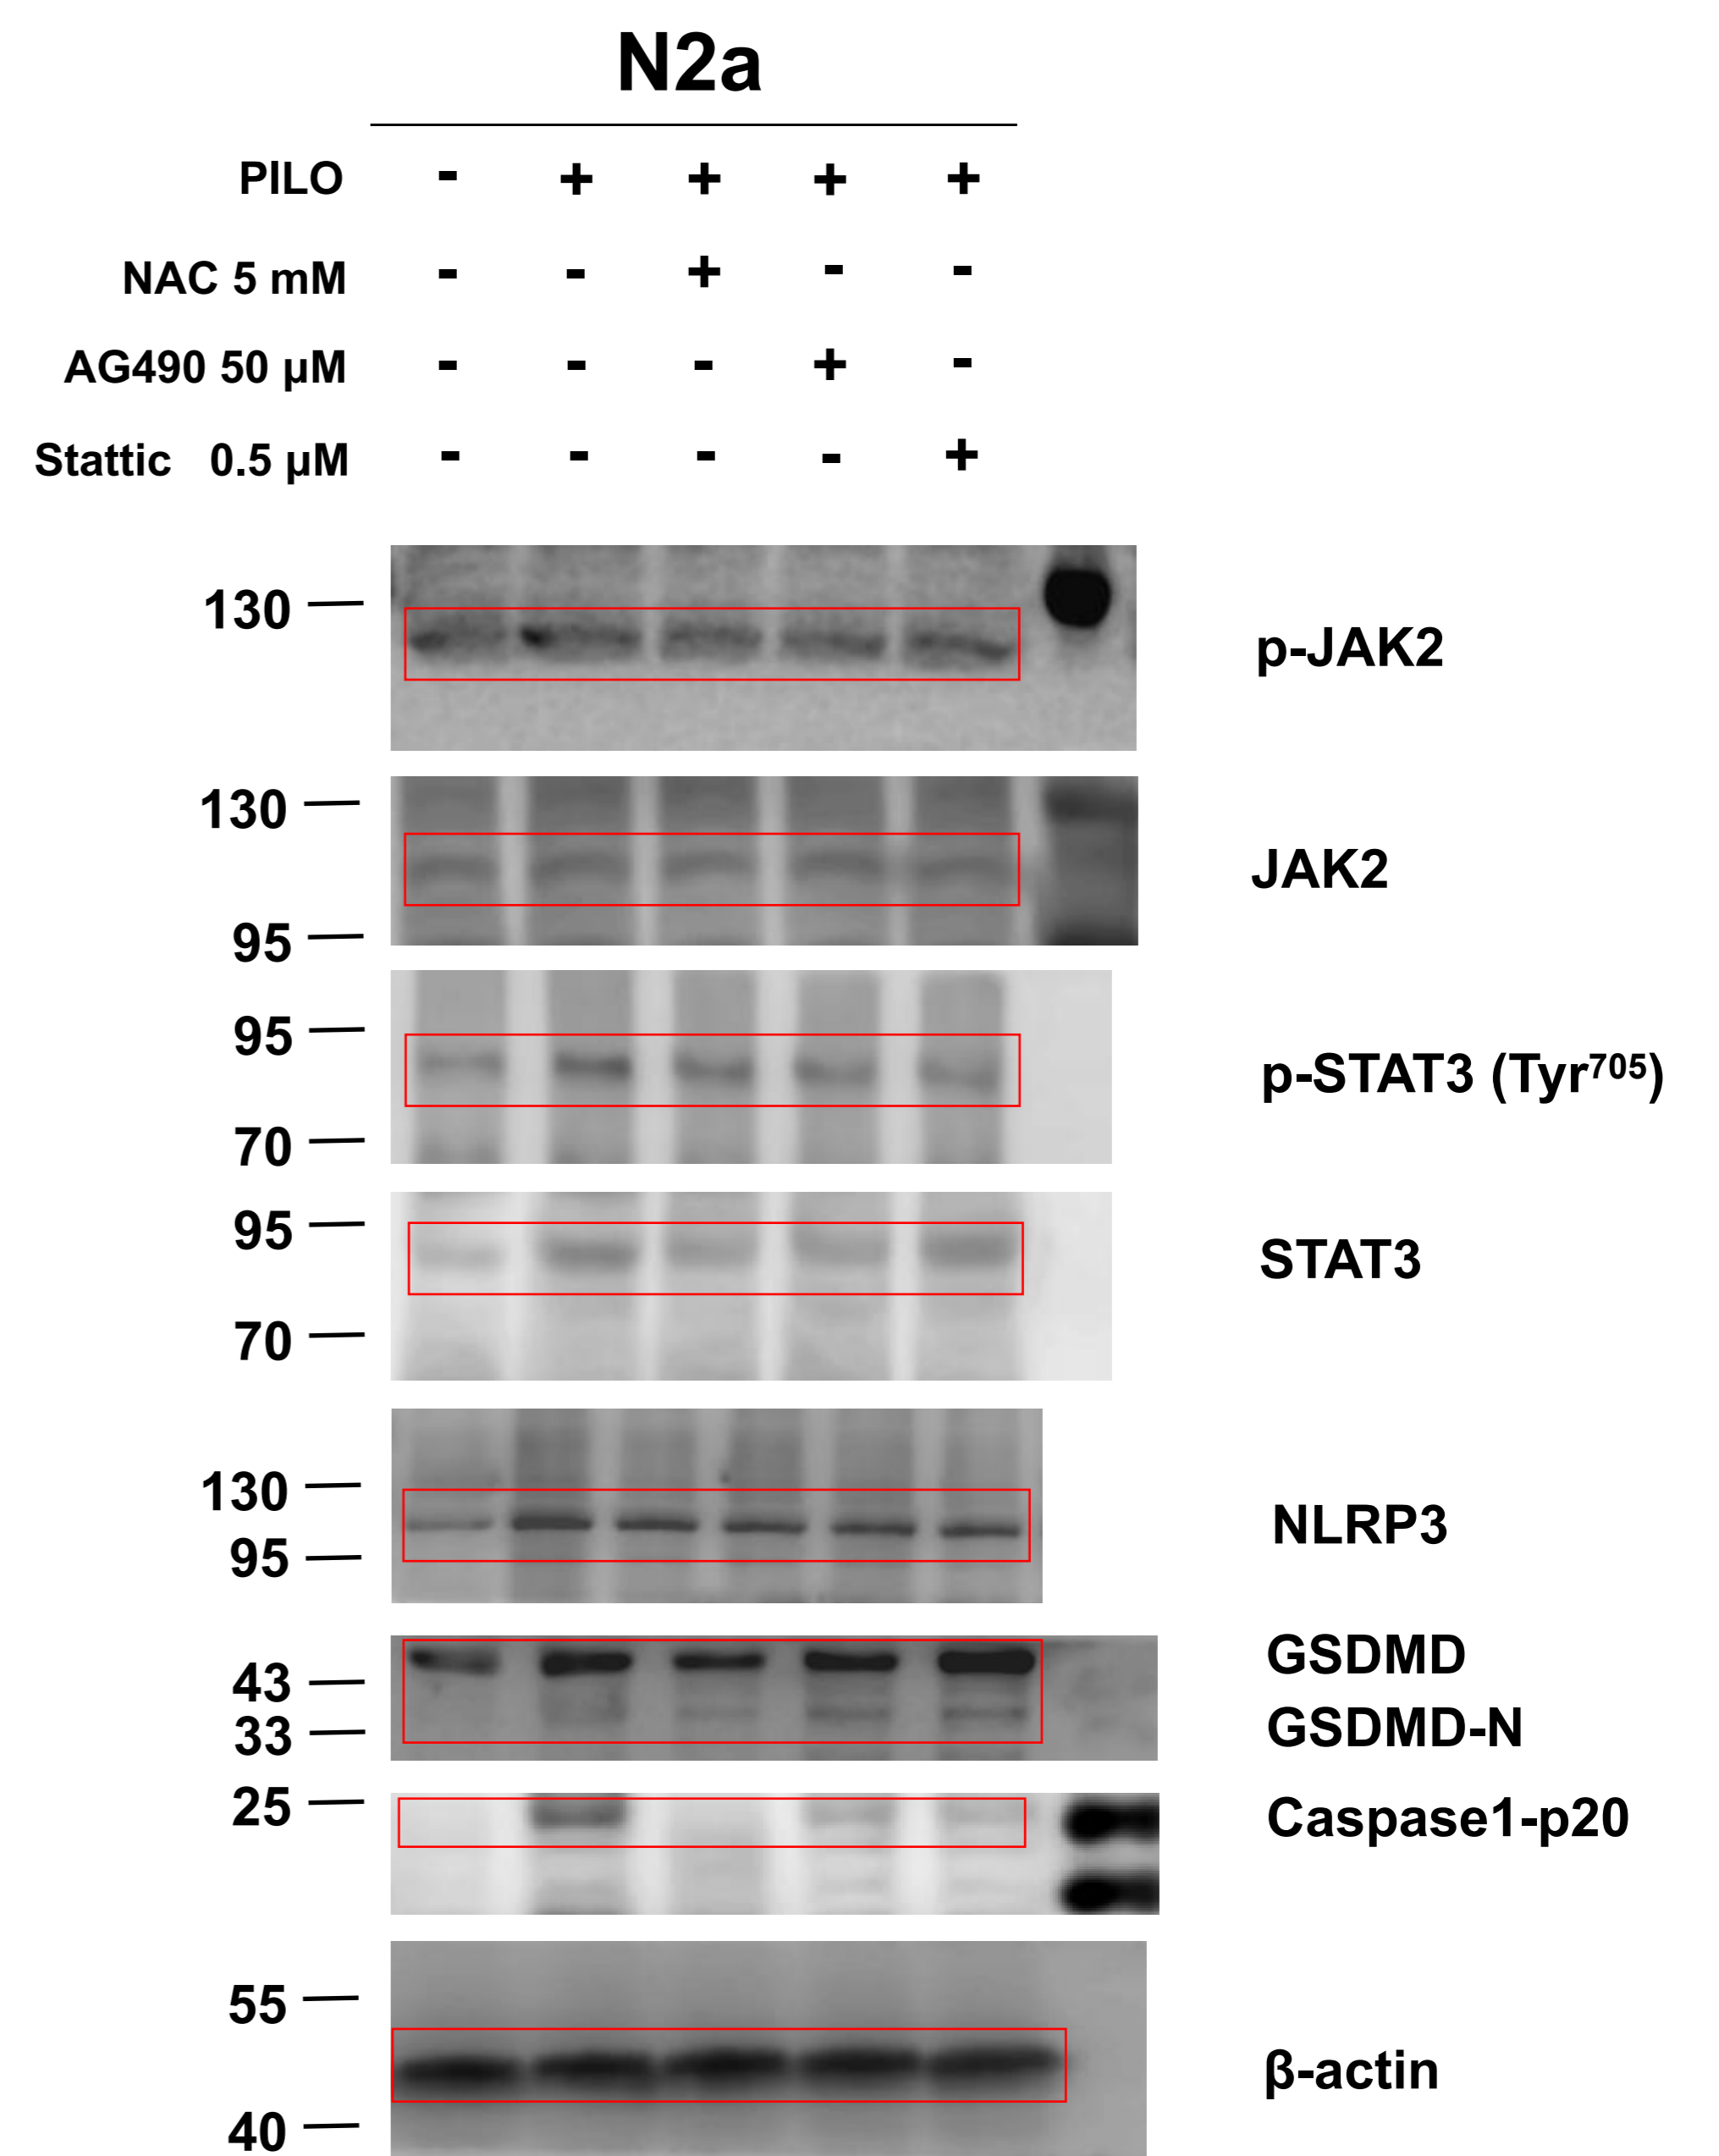

**Figure 6G**

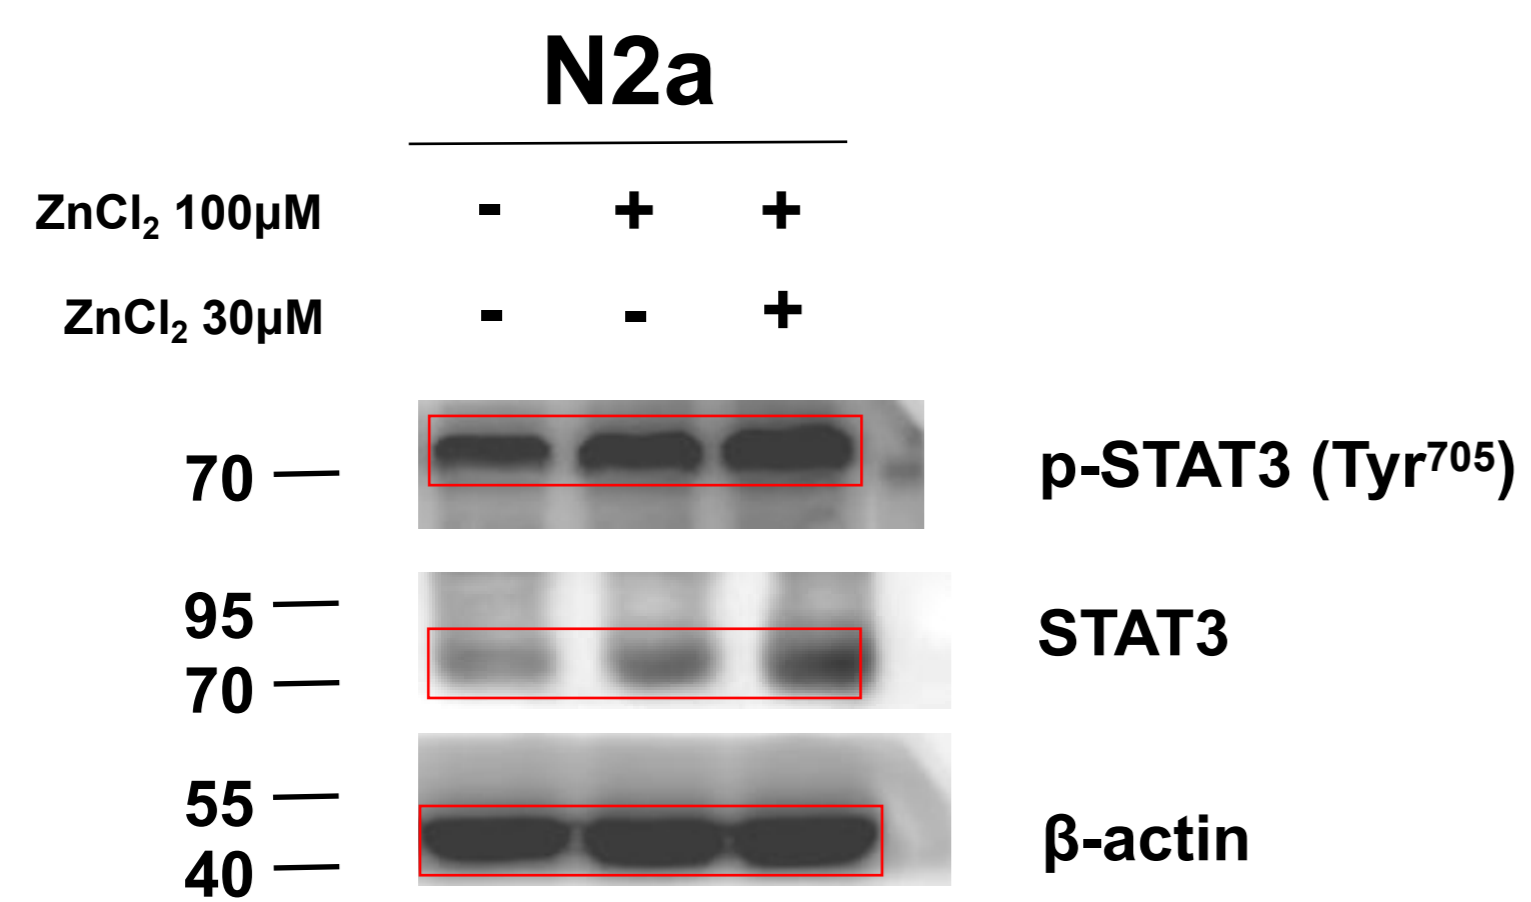

**Figure 7C**

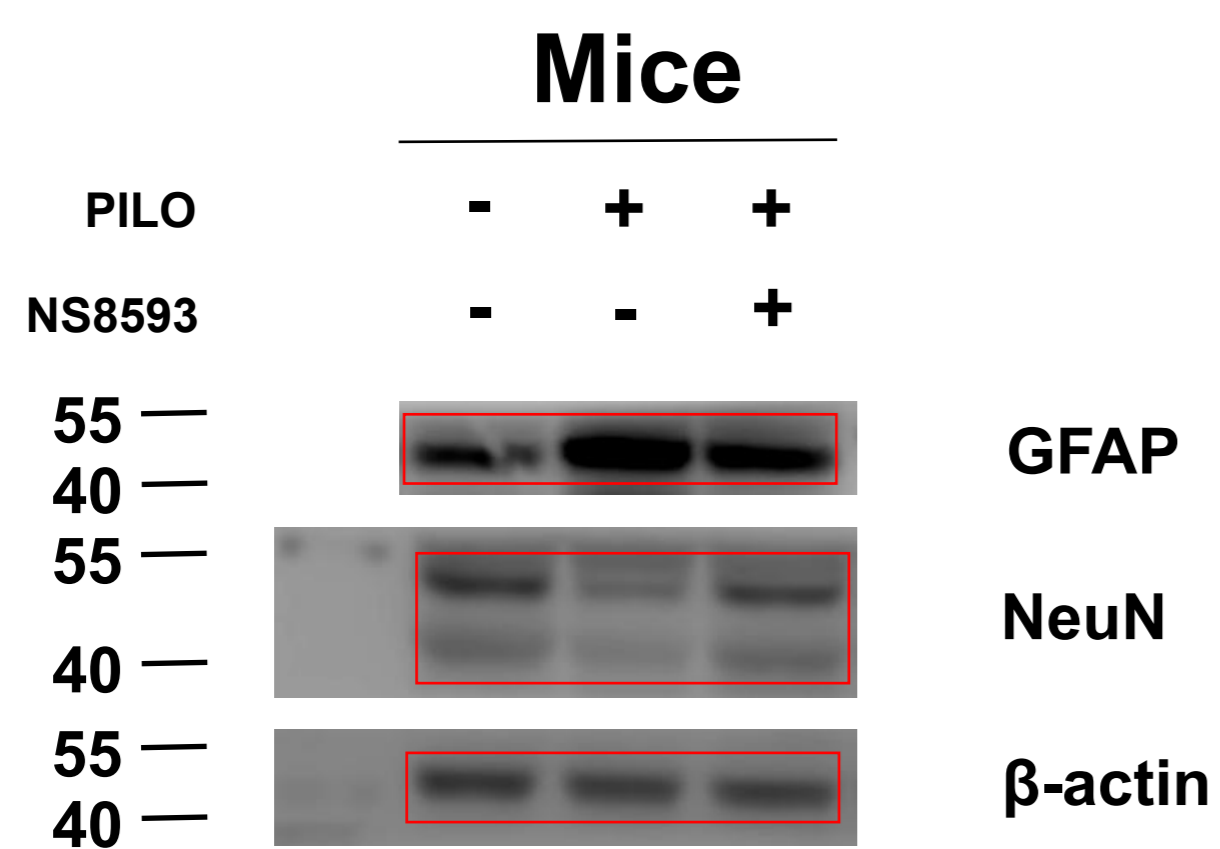



### Figure 9A

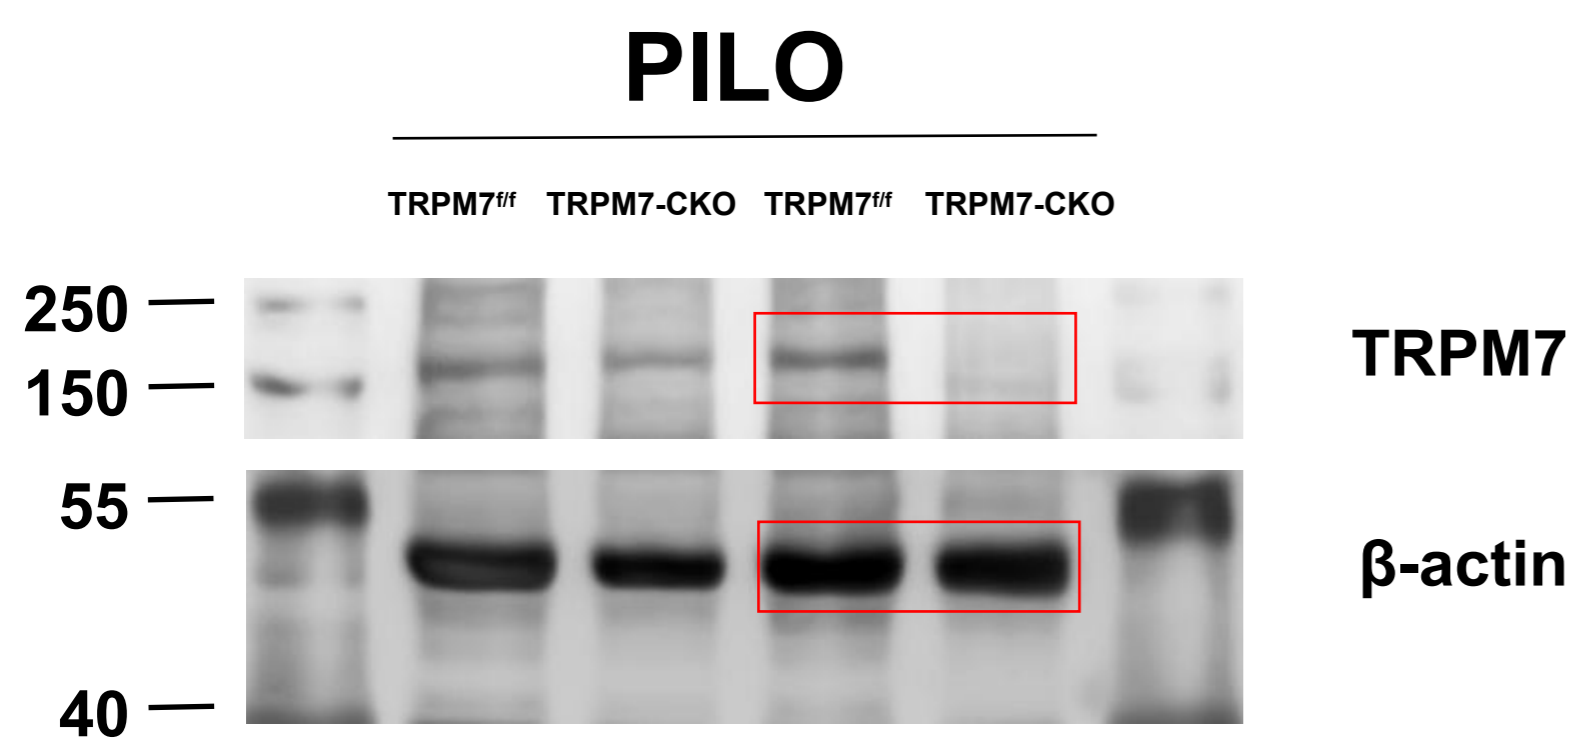

### Figure 10H

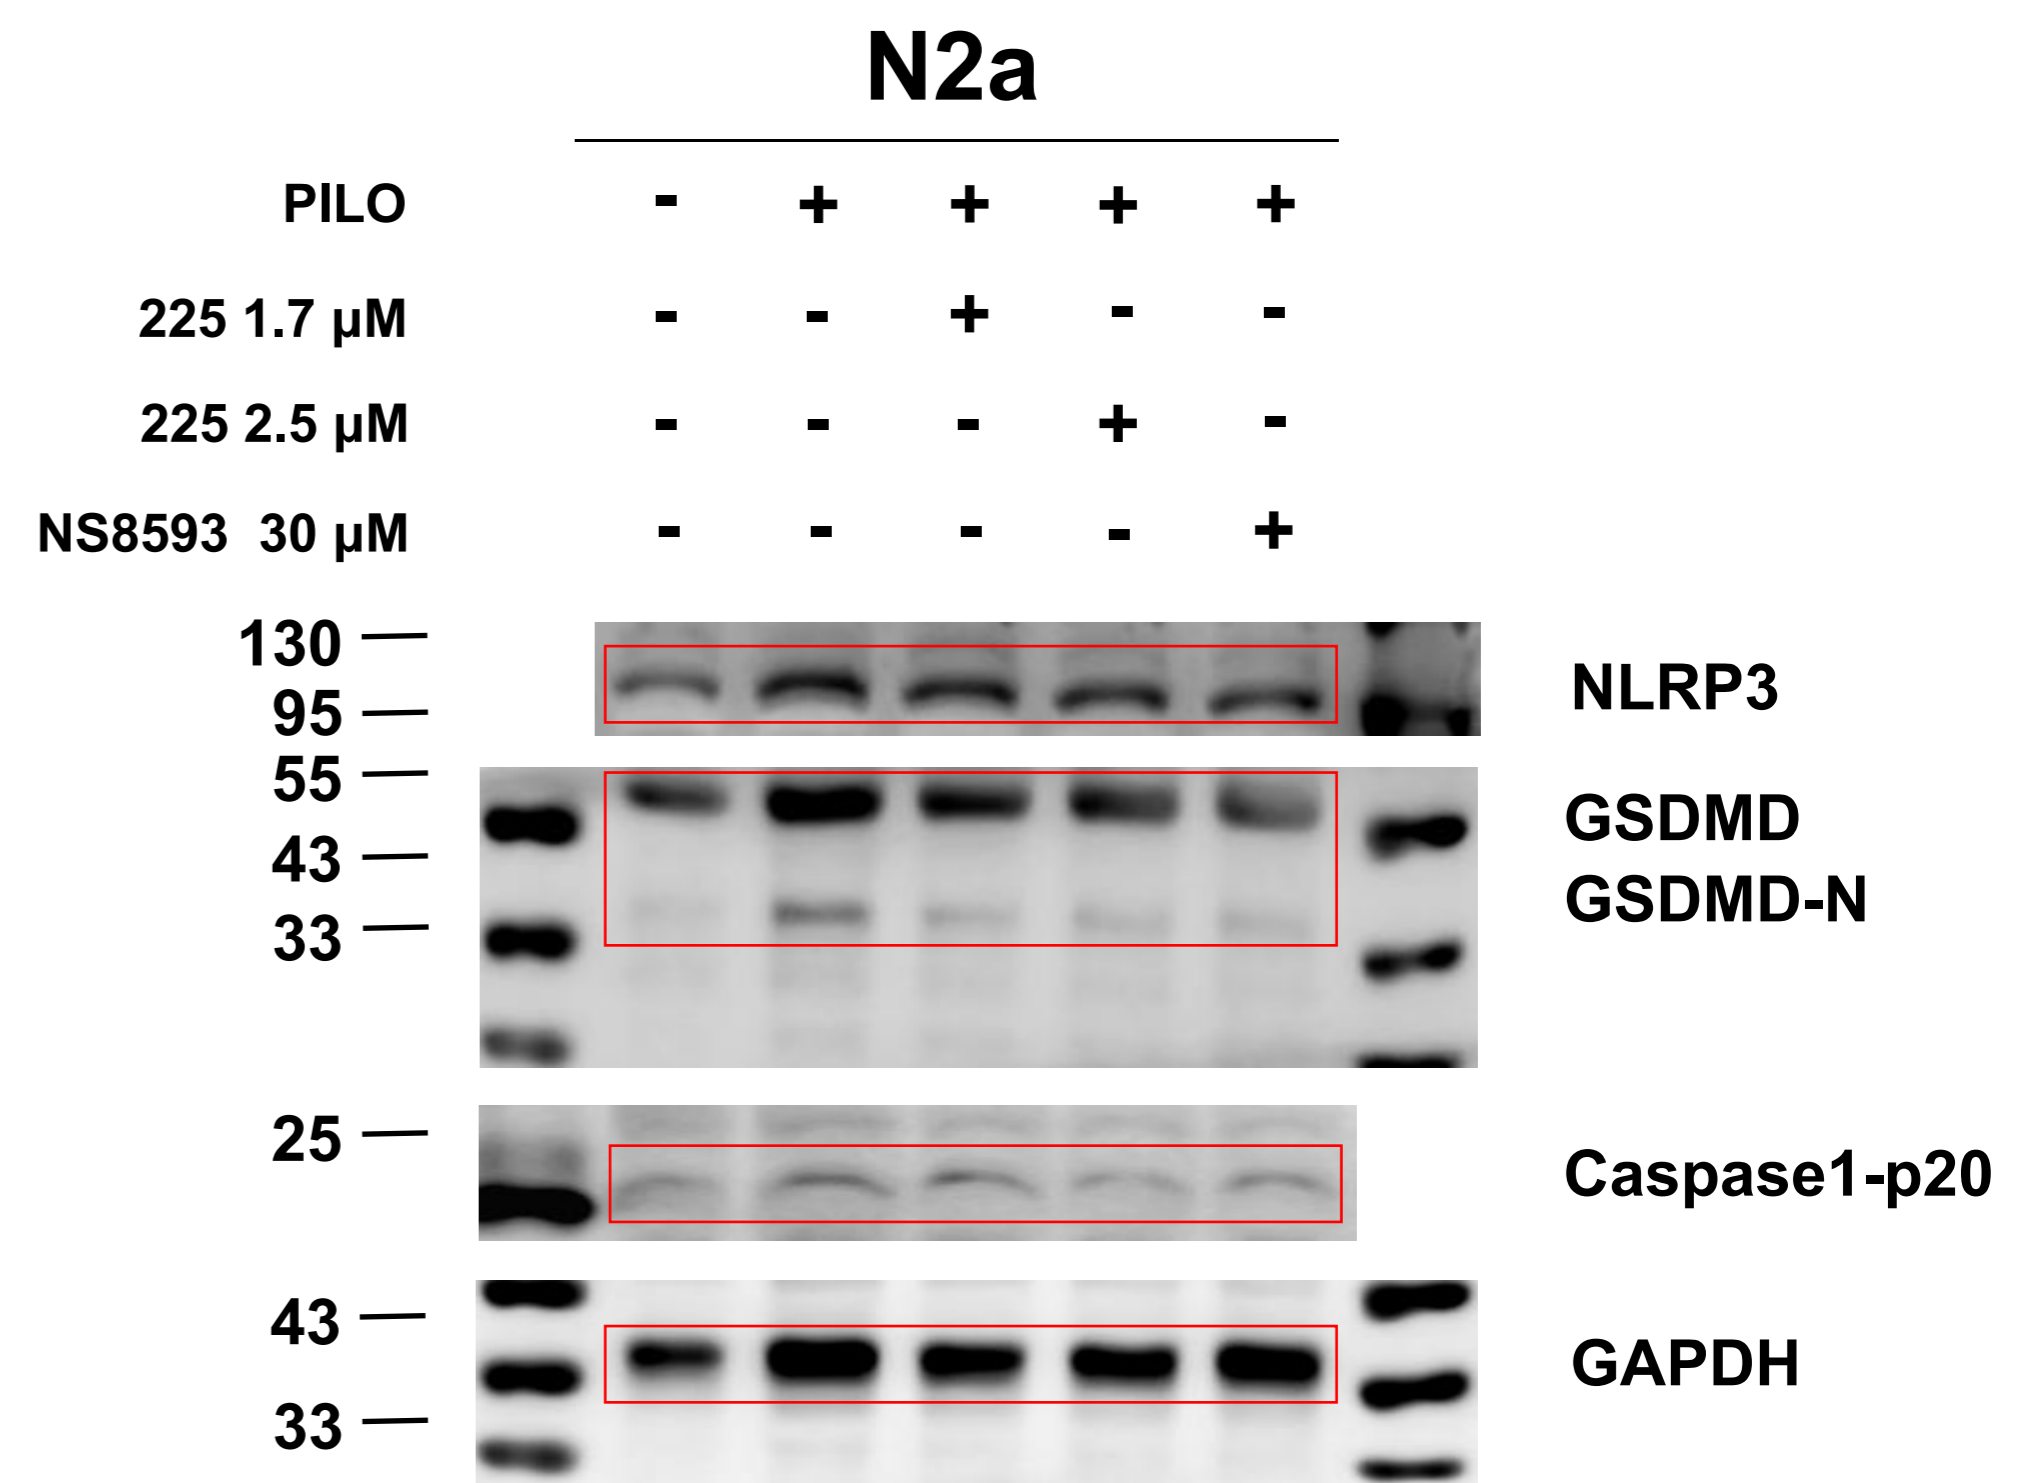

### Figure 9C

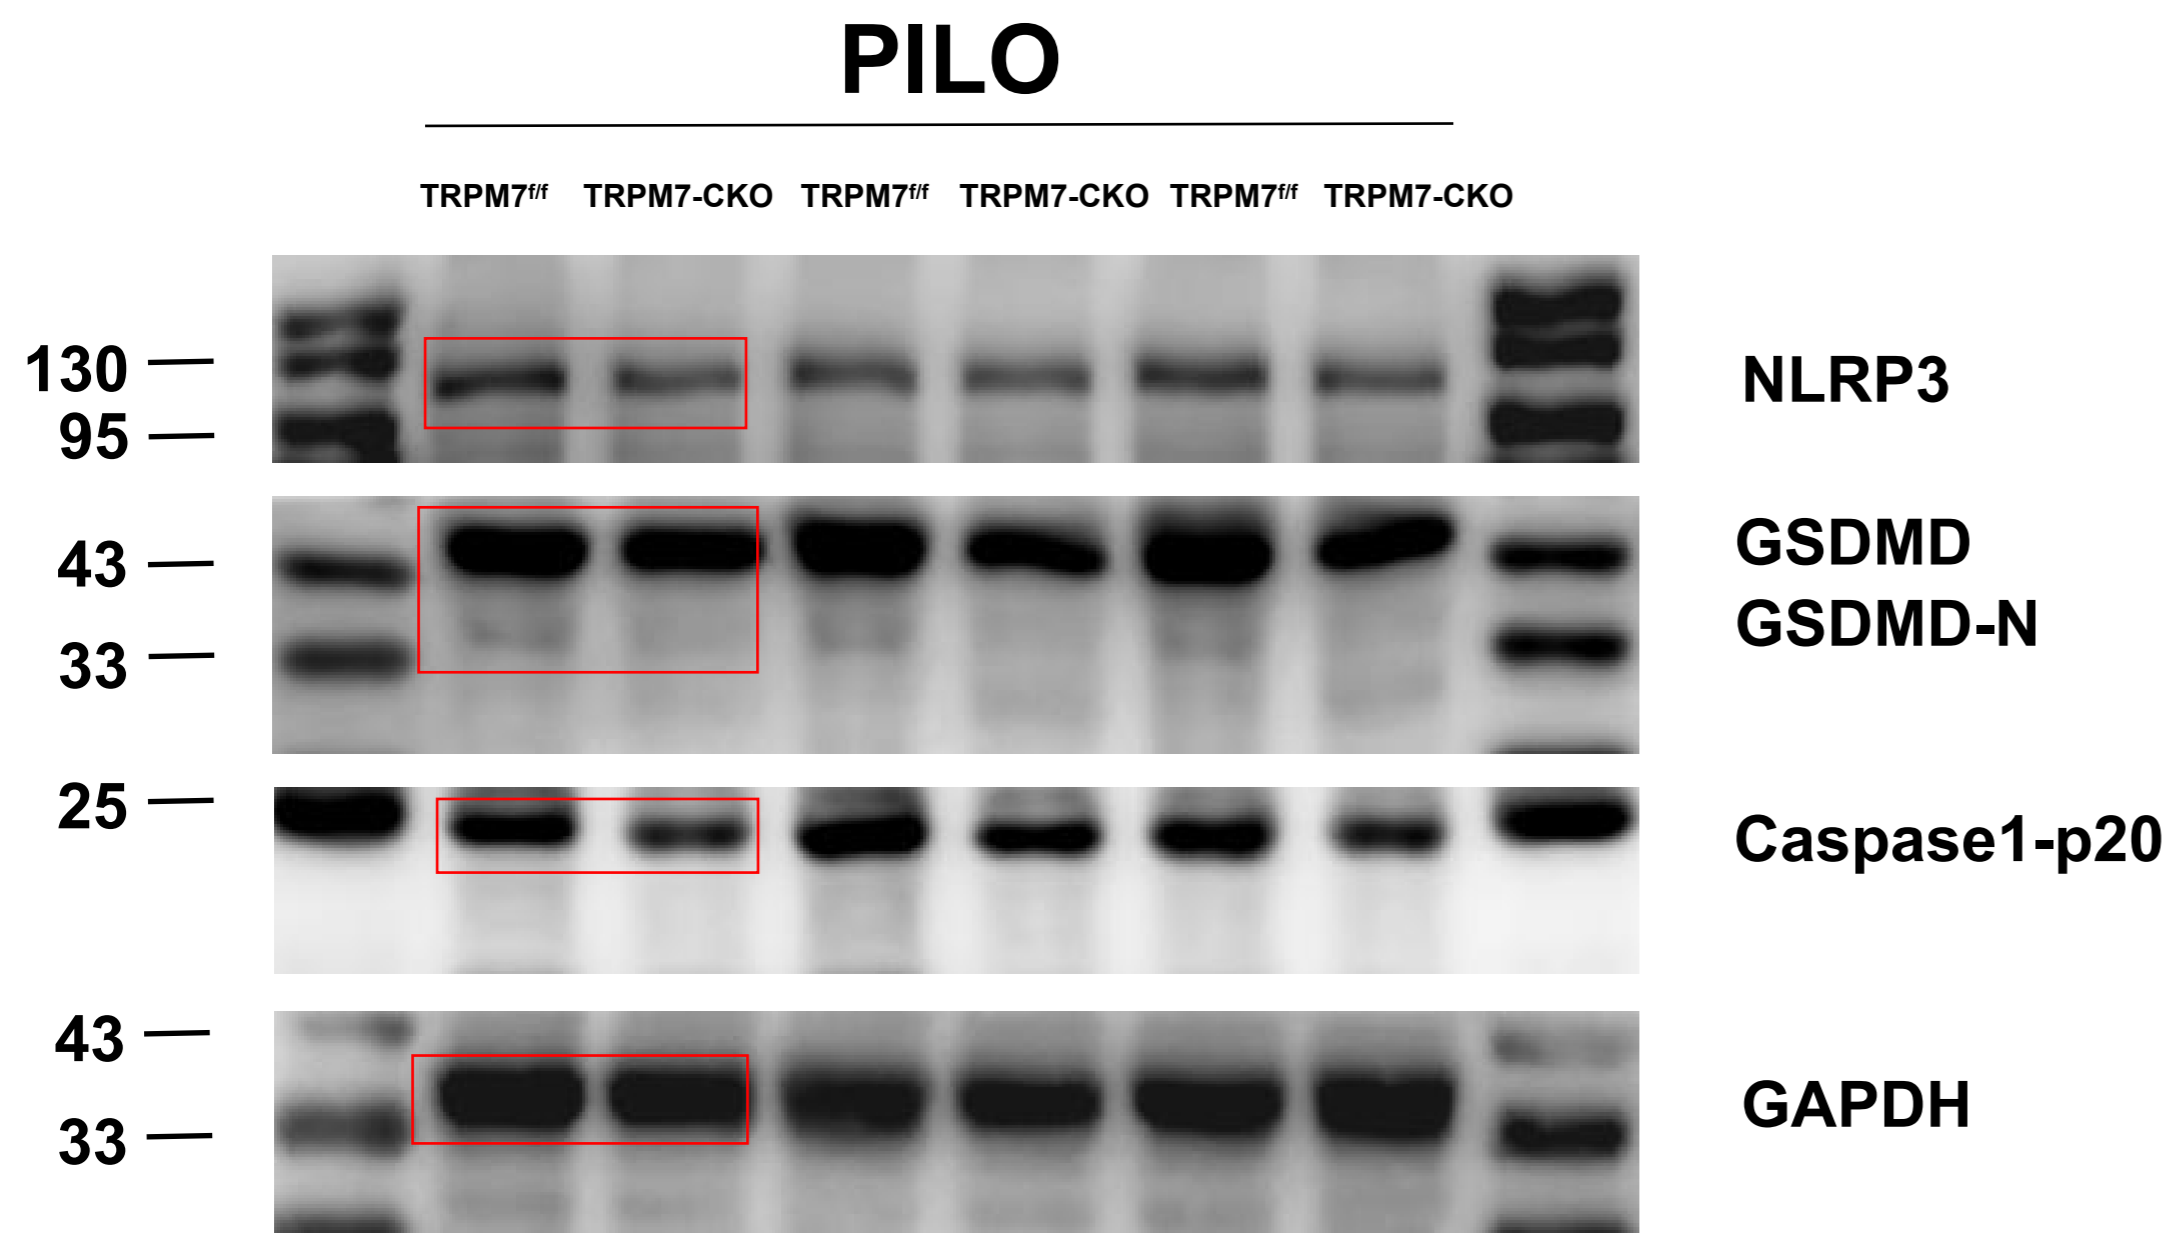

### Supplemental Figure 1B

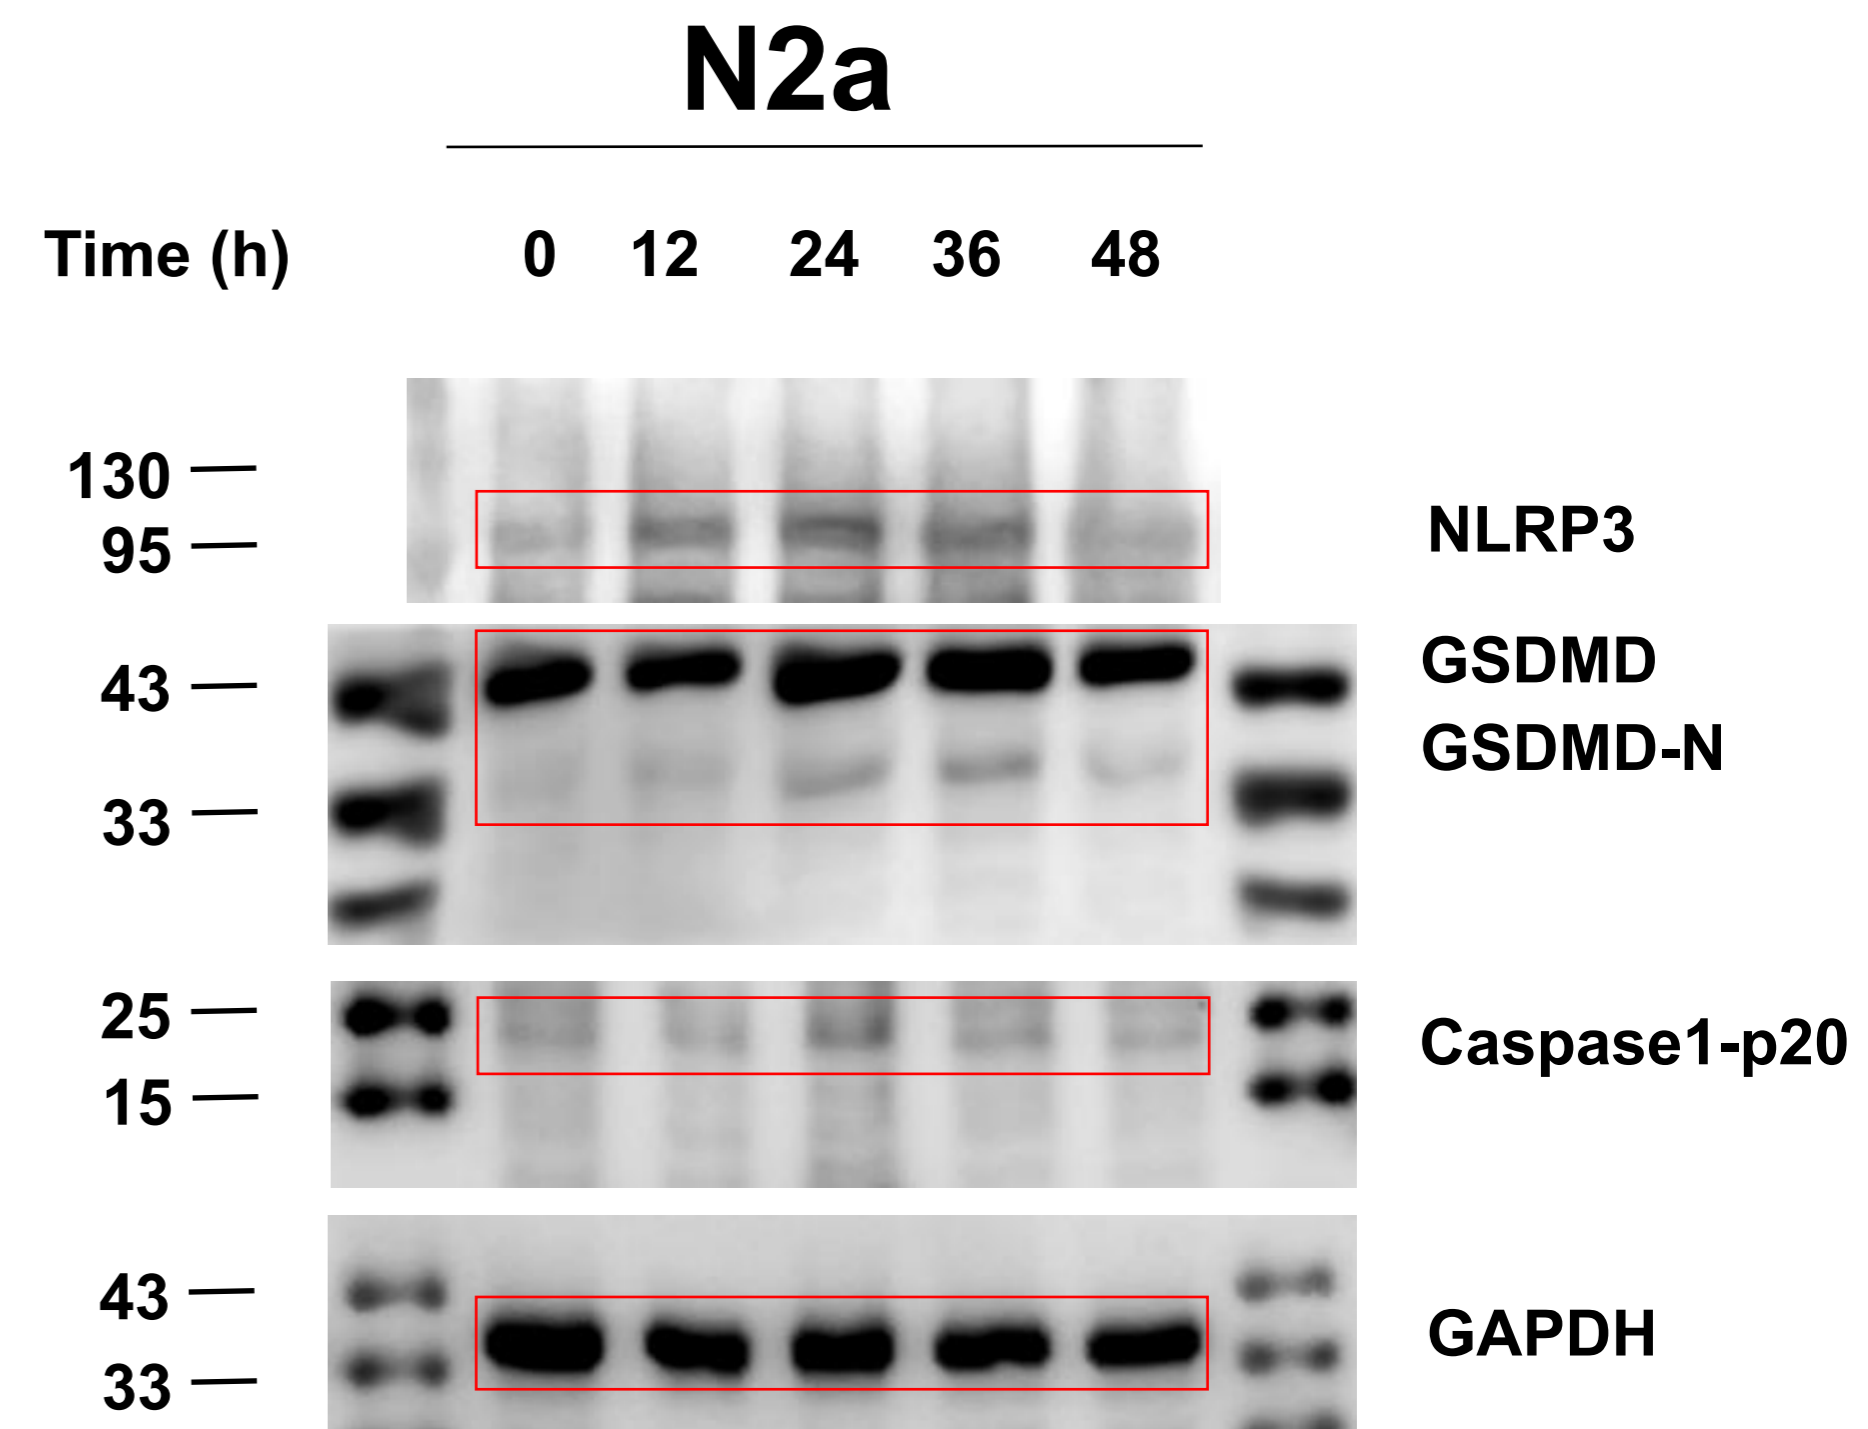

### Figure 10E

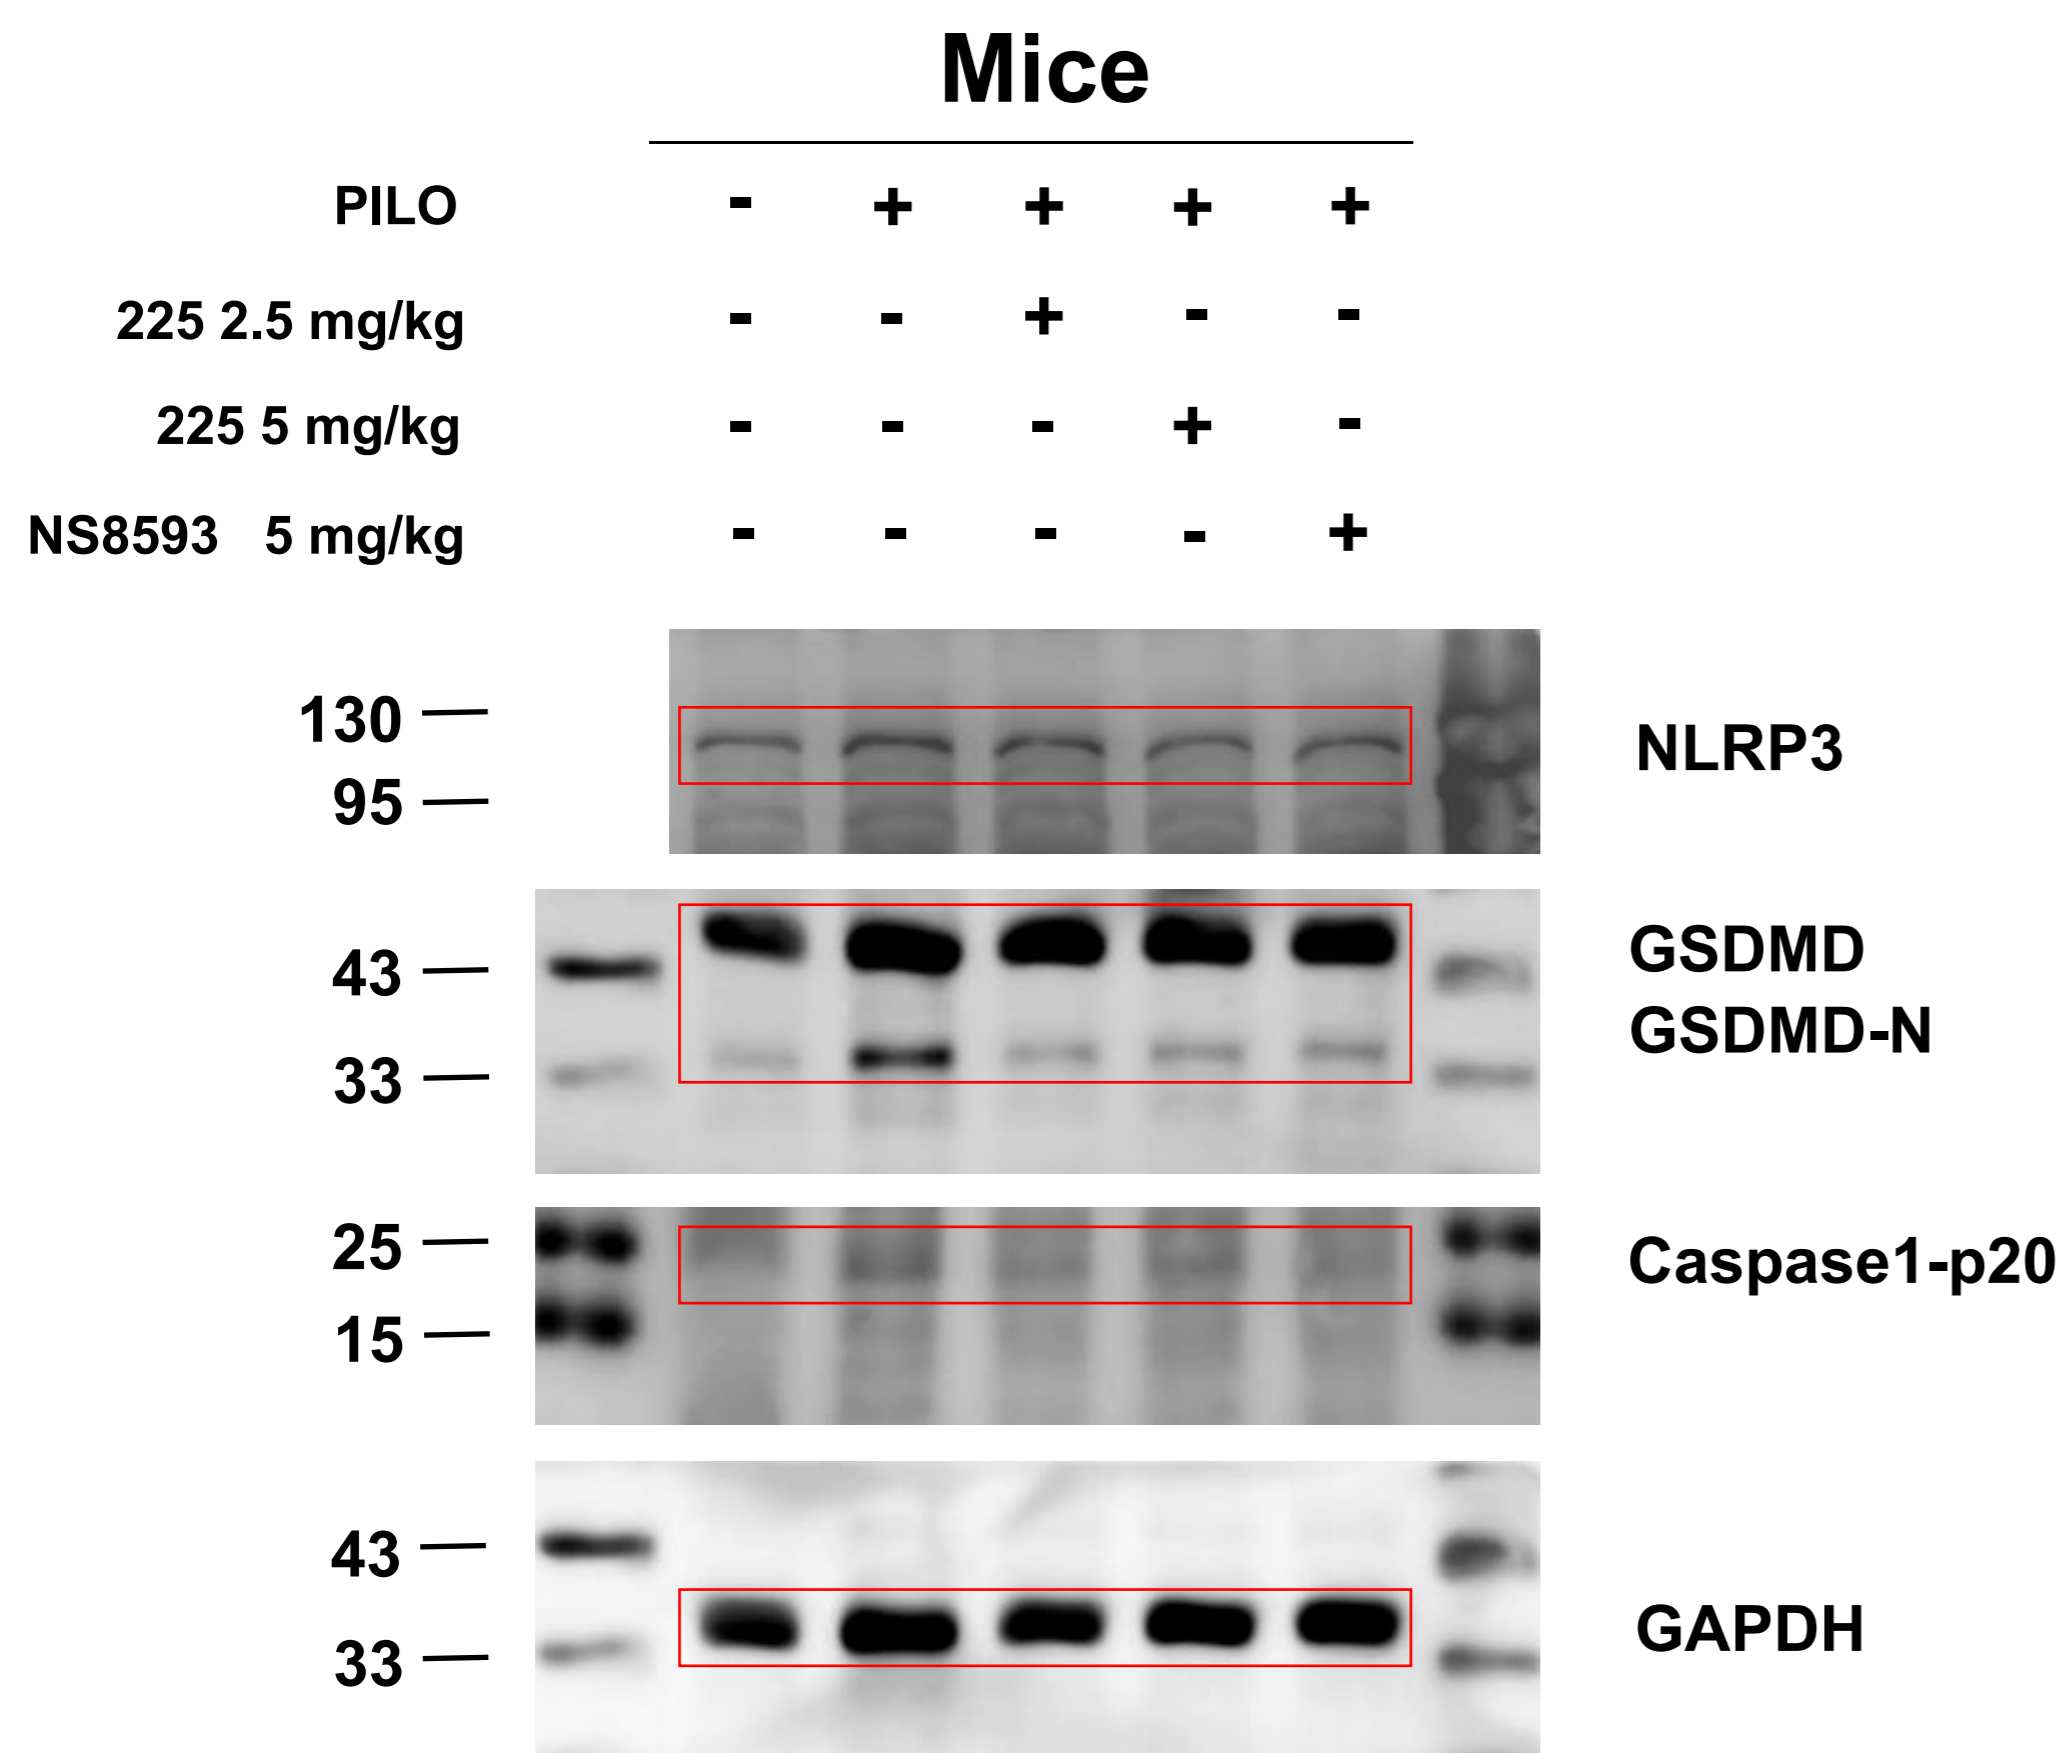

Supplement: 12974_2024_3292_MOESM2_ESM.pdf [file 12974_2024_3292_MOESM2_ESM.pdf]
