# Supplementary material for: TRPM7 contributes to pyroptosis and its involvement in status epilepticus
Source: PubMed Central journal article supplement — J Neuroinflammation. 2024 Dec 1;21:315. doi: 10.1186/s12974-024-03292-4 (PMC11608501; doi:10.1186/s12974-024-03292-4), 2024-12-01
Supplement: 12974_2024_3292_MOESM3_ESM.pdf [file 12974_2024_3292_MOESM3_ESM.pdf]

## Supplemental Figure 1

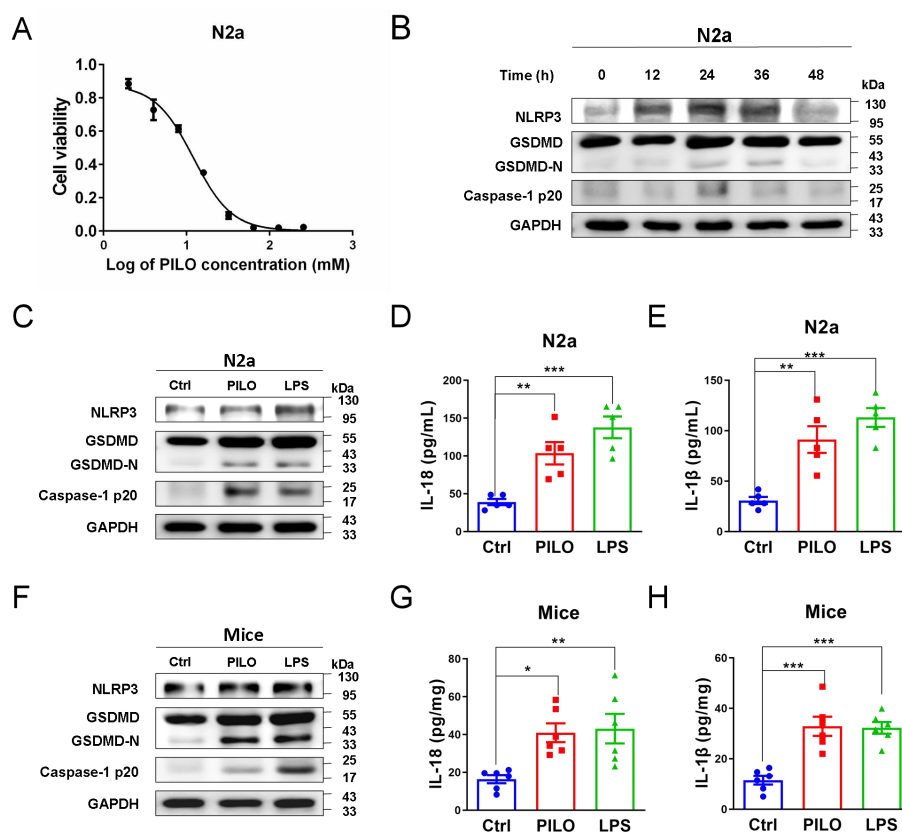

### Supplemental Figure 1. PILO-treatment induced pyroptosis in N2a cells and mice.

**A** IC<sub>50</sub> values of PILO in N2a cells was measured by CCK-8 assays and calculated using GraphPad. **B** The representative protein bands of NLRP3, GSDMD and caspase-1 p20 expression in N2a cells treated with 12 mM PILO for 0 h, 12 h, 24 h, 36 h, or 48 h ( $n = 5$  or 6). **C-E** The representative protein bands ( $n = 6$ ) and ELISA analysis ( $n = 5$ ) of N2a cells treated with PILO for 24 h or pretreated with 1  $\mu$ g/mL LPS for 4 h and then treated with 15  $\mu$ M Nigericin for 1 h. **F-H** The representative protein bands and ELISA analysis in hippocampus of C57BL/6J mice treated with PILO (300 mg/kg) or LPS (20 mg/kg) ( $n = 6$ ). Full scans of all the blots are in the Supplementary Note. \* $P < 0.05$ ; \*\*  $P < 0.01$ ; \*\*\*  $P < 0.001$ .

## Supplemental Figure 2

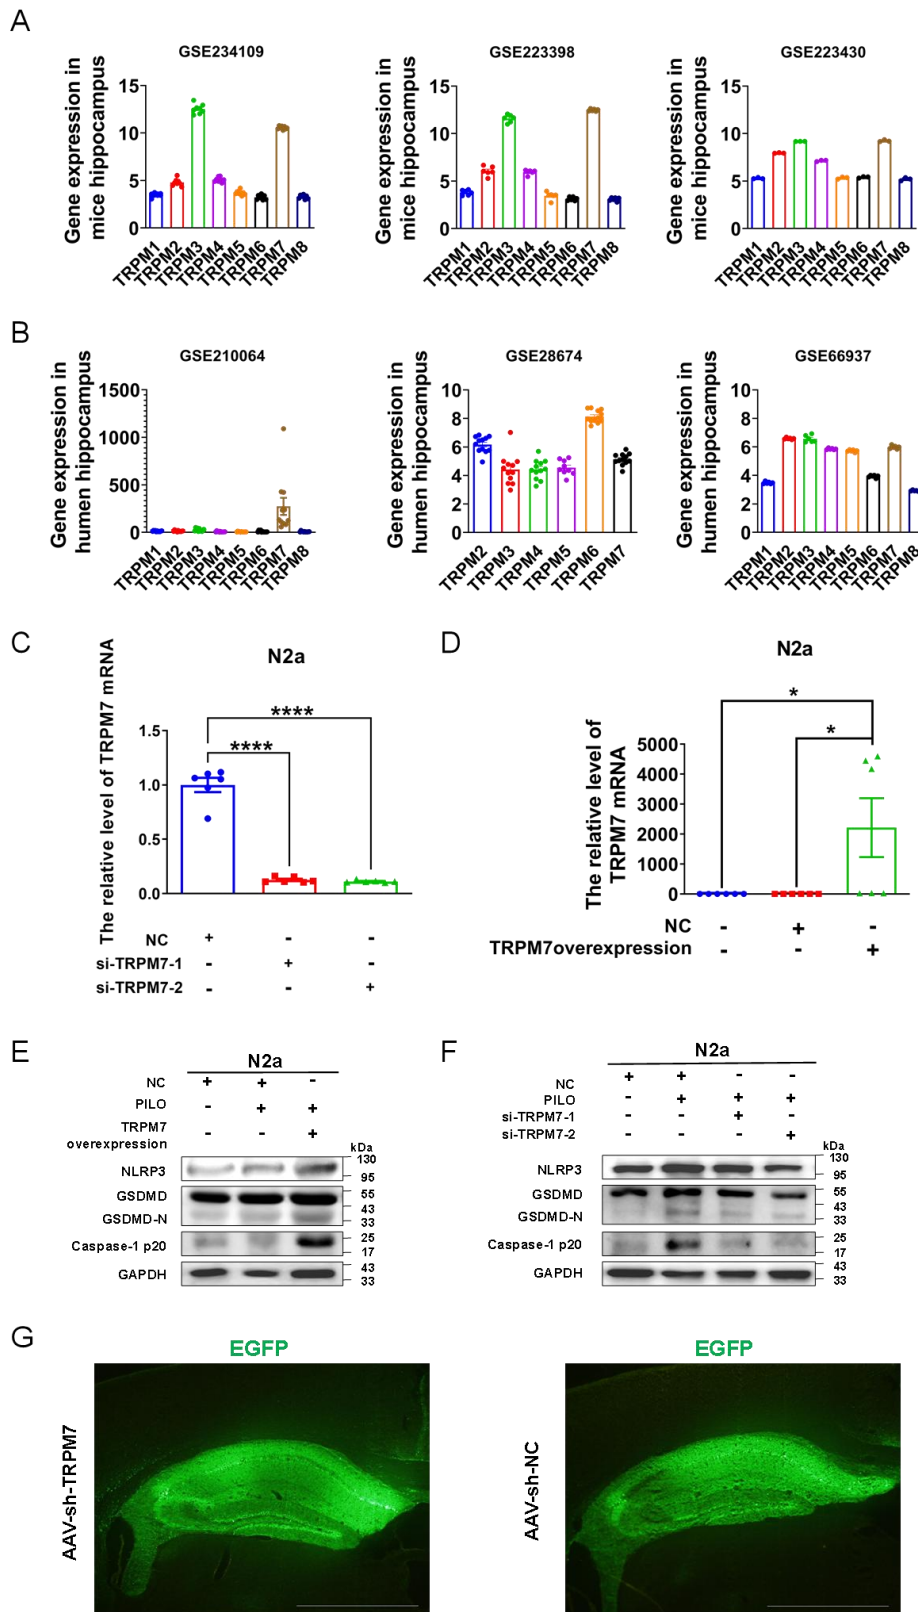

Supplemental Figure 2. TRPM7 participated in pyroptosis.

**A** The gene expression of TRPM subfamily in hippocampi from healthy mice, which was measured by three independent GEO datasets ( $n = 3, 6$  or  $8$ ). **B** The gene expression of TRPM subfamily in hippocampi from healthy human, which was measured by three independent GEO datasets ( $n = 6, 11$  or  $12$ ). **C, D** The mRNA expression of TRPM7 in PILO-treated N2a cells after TRPM7 knockdown (C) or TRPM7 overexpression (D) ( $n = 6$ ). **E** The representative protein bands of NLRP3, GSDMD, and caspase-1 p20 in PILO-treated N2a cells after TRPM7 overexpression ( $n = 5$  or  $6$ ). **F** The representative protein bands of NLRP3, GSDMD, and caspase-1 p20 in PILO-treated N2a cells after TRPM7 knockdown ( $n = 5$  or  $6$ ). **G** Immunofluorescence analysis of EGFP (green) in hippocampus (4x lens) of AAV-sh-TRPM7 and AAV-sh-NC transfected C57BL/6J mice. Scale bar,  $500 \mu\text{m}$ . Full scans of all the blots are in the Supplementary Note.  $*P < 0.05$ ;  $**P < 0.01$ .

### Supplemental Figure 3

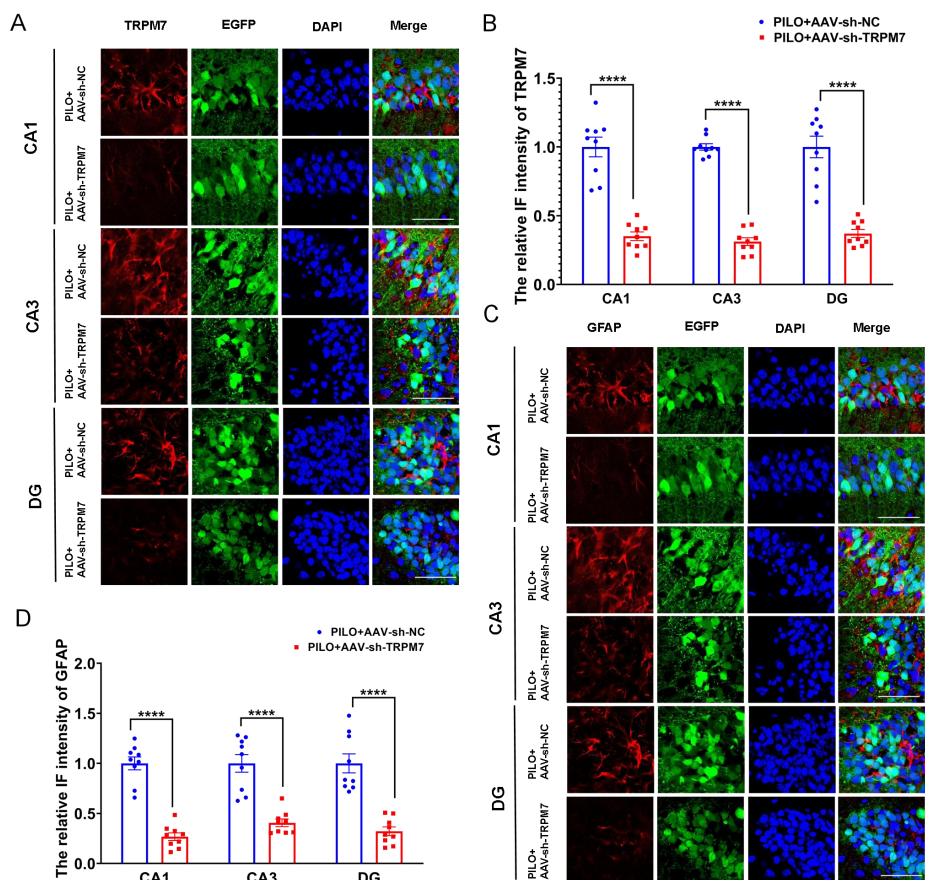

### Supplemental Figure 3. Silencing TRPM7 downregulated TRPM7 expression and alleviated neuronal damage in PILO-treated SE mice.

**A, B** Immunofluorescence analysis of TRPM7 (red) expression in hippocampus (60x lens) of PILO-treated C57BL/6J mice after AAV-sh-TRPM7-EGFP (green) or AAV-sh-NC-EGFP (green) transfection, including the CA1, CA3, and DG regions ( $n=9$ ). Scale bar: 100  $\mu\text{m}$ . DAPI (blue) is used to label nucleus. **C, D** Immunofluorescence analysis of GFAP (red) expression in hippocampus (60x lens) of PILO-treated C57BL/6J mice after AAV-sh-TRPM7-EGFP (green) or AAV-sh-NC-EGFP (green) transfection, including the CA1, CA3, and DG regions ( $n=9$ ). Scale bar: 100  $\mu\text{m}$ . DAPI (blue) is used to label nucleus. \*\*\*\*  $P < 0.0001$ .

## Supplemental Figure 4

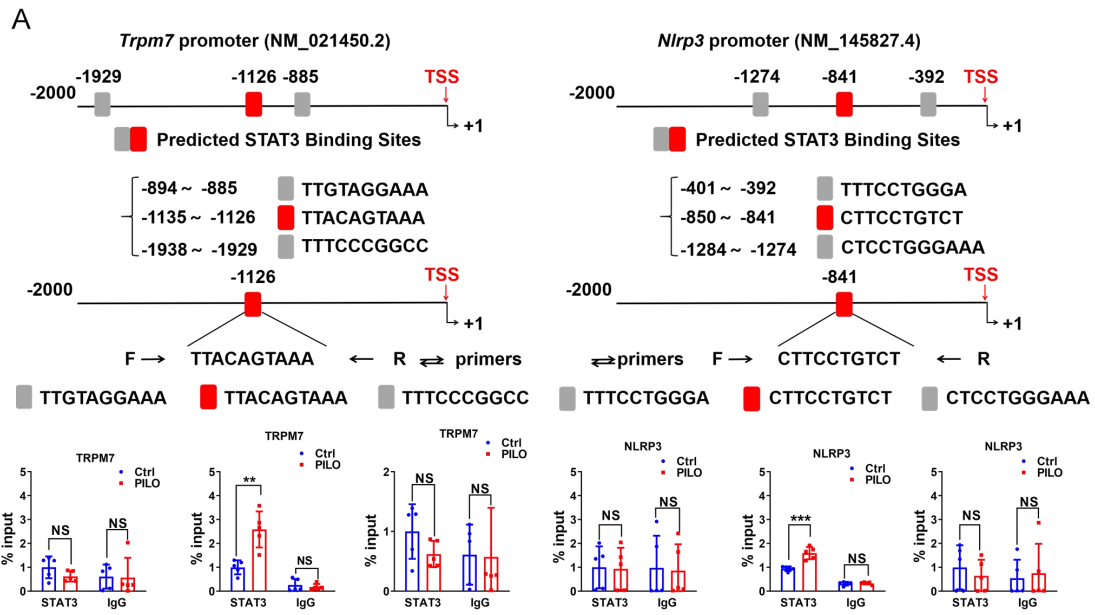

**Supplemental Figure 4. STAT3 was recruited to the promoter regions of *Trpm7* and *Nlrp3*.**

**A Top:** A sketch applied to show the predicted binding sites of STAT3 in *Trpm7* or *Nlrp3* promoter. **Bottom:** ChIP assays performed on the promoter regions of *Trpm7* or *Nlrp3* with the STAT3 antibodies in N2a cells with or without PILO (10  $\mu$ M) treatment ( $n = 5$ ). TSS indicates transcription start site. \*\*  $P < 0.01$ ; \*\*\*  $P < 0.001$ ; NS not significant.

## Supplemental Figure 5

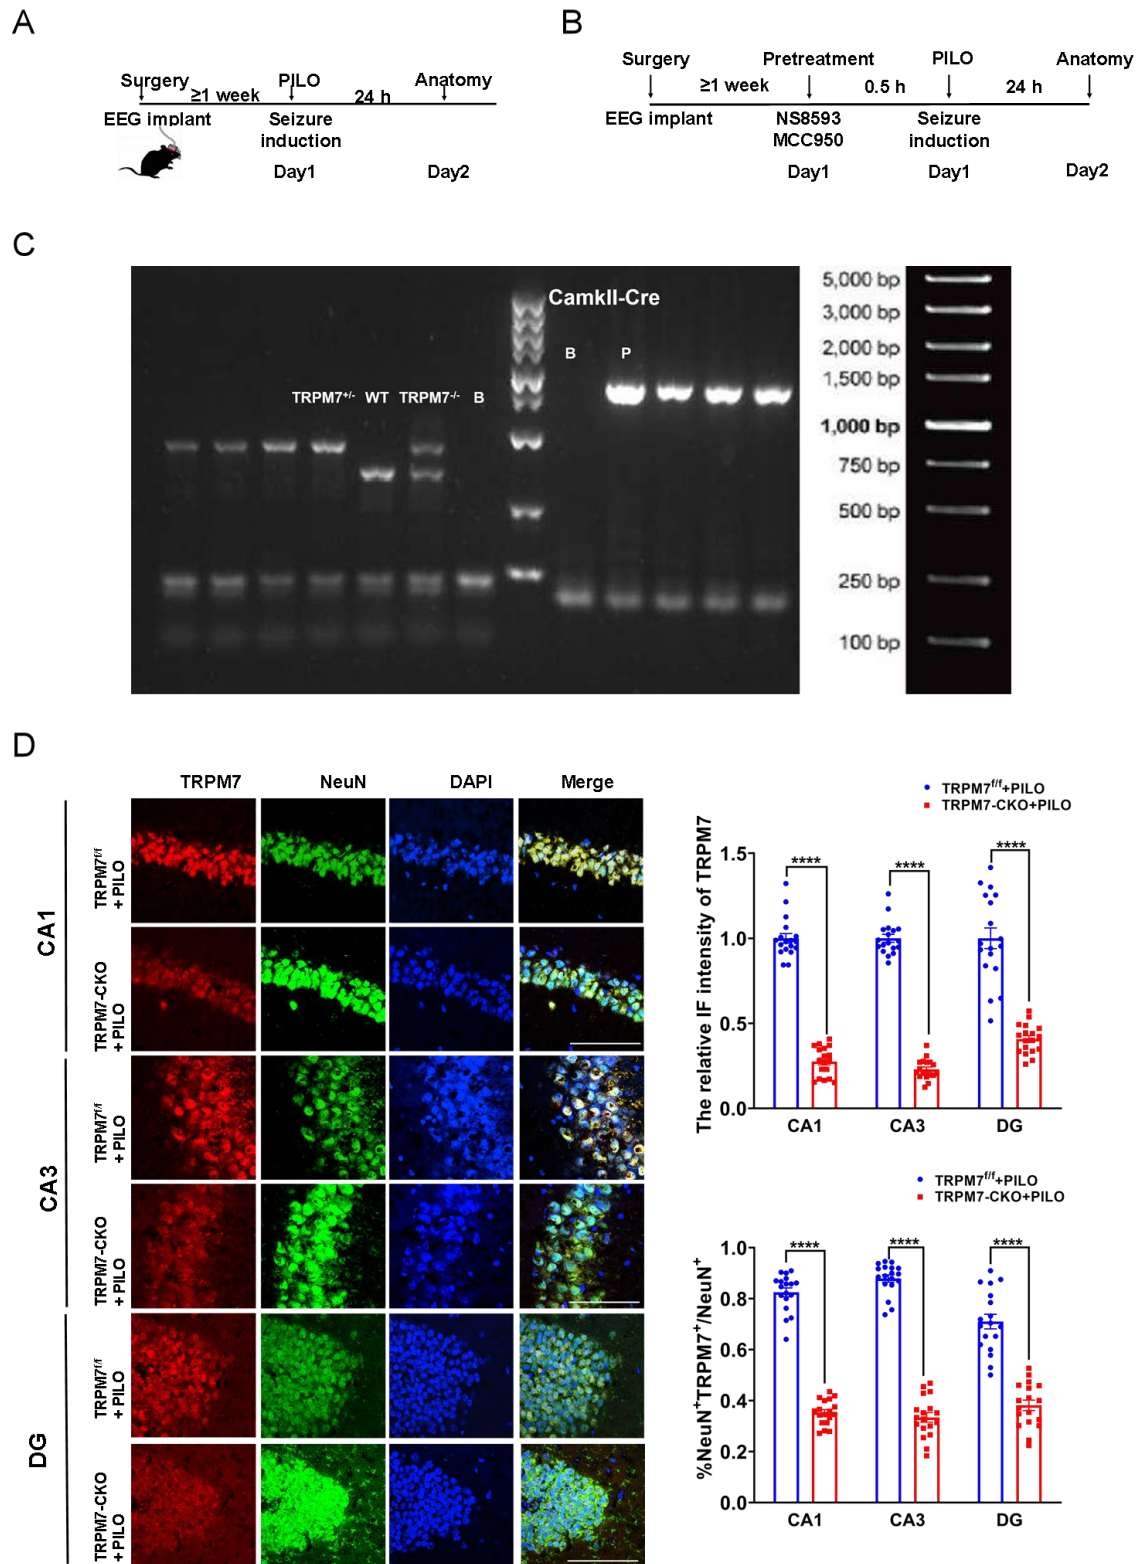

Supplemental Figure 5. TRPM7 conditional knockout mice alleviated neuronal damage.

**A** Schematic diagram showing the injection protocol of PILO-treated C57BL/6J mice after AAV-sh-TRPM7-EGFP (green) or AAV-sh-NC-EGFP (green) transfection. **B** Schematic diagram showing the injection protocol of PILO-treated C57BL/6J mice after injected with NS8593 or MCC950 or both. **C** Mice were genotyped using DNA extracted from tail biopsies and PCR with gene-specific primers. **D** Immunofluorescence analysis of TRPM7 (green) and NeuN (red) expression in hippocampus (100x lens) of TRPM7-CKO mice, including the CA1, CA3 and DG regions ( $n = 18$ ). Scale bar: 100  $\mu\text{m}$ . DAPI (blue) was used to label nucleus. \*\*\*\*  $p < 0.0001$ .



## Supplemental Figure 6

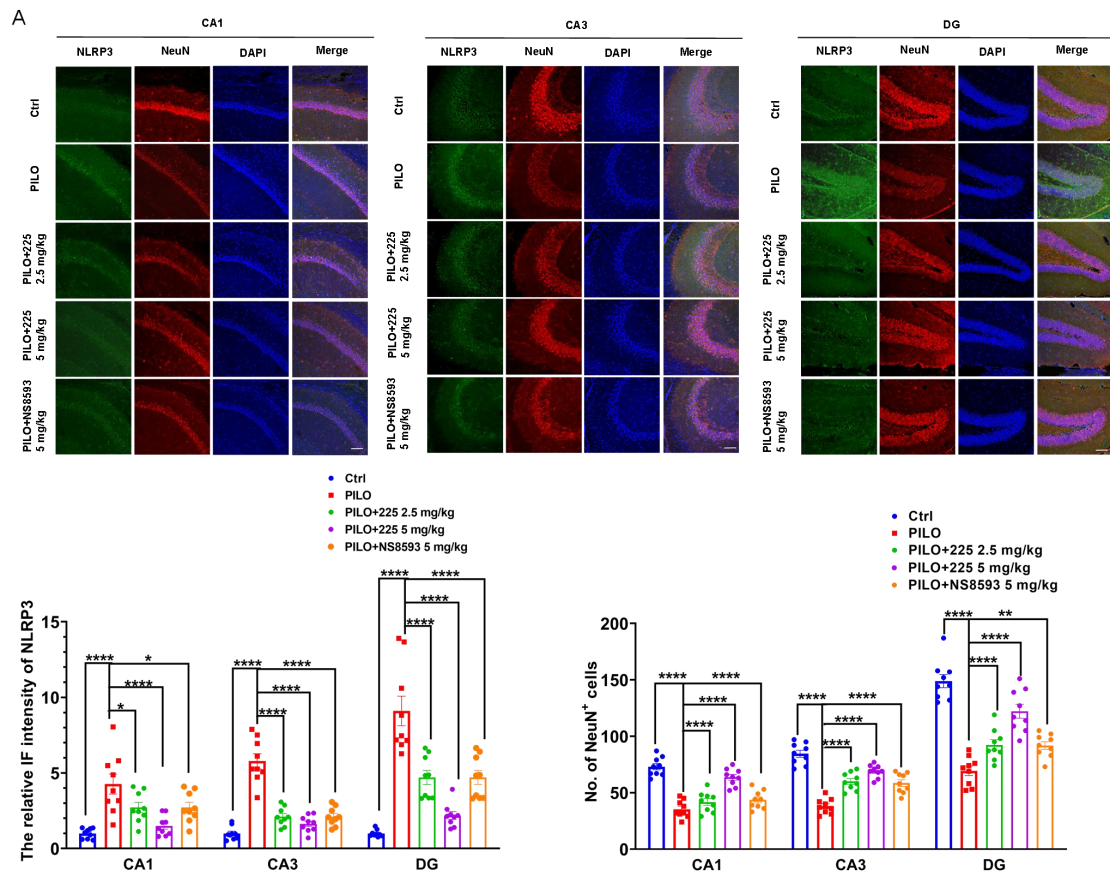

### Supplemental Figure 6. The TRPM7 inhibitor, SDUY-225, alleviated pyroptosis in PILO-treated SE mice.

A Immunofluorescence analysis of NeuN (red) and NLRP3 (green) expression in hippocampus (60x lens) of PILO-treated C57BL/6J mice after 225 (low-dosage and high-dosage) or NS8593 pretreatment, including the CA1, CA3, and DG regions. ( $n = 9$ ). Scale bars: 100  $\mu\text{m}$ . DAPI (blue) was used to label nucleus. \* $P < 0.05$ ; \*\*  $P < 0.01$ ; \*\*\*\*  $P < 0.0001$ .



## Supplemental Figure 7

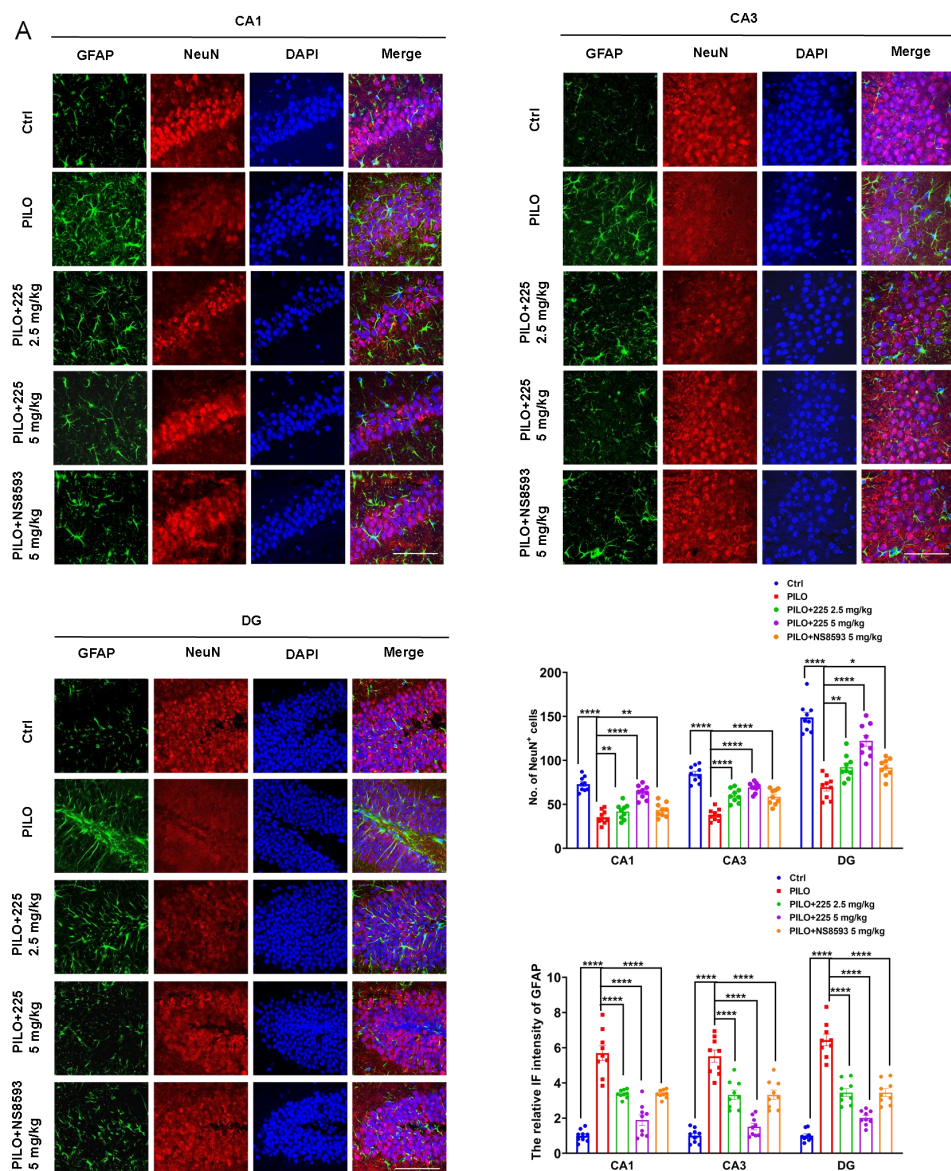

**Supplemental Figure 7. The TRPM7 inhibitor, SDUY-225, alleviated neuronal damage in PILO-treated SE mice.**

**A** Immunofluorescence analysis of NeuN (red) and GFAP (green) expression in hippocampus (60x lens) of PILO-treated C57BL/6J mice after 225 (low-dosage and high-dosage) or NS8593 pretreatment, including the CA1, CA3, and DG regions. ( $n=9$ ). Scale bars: 100  $\mu\text{m}$ . DAPI (blue) was used to label nucleus. Results were shown as mean  $\pm$  SEM. \* $P < 0.05$ ; \*\*  $P < 0.01$ ; \*\*\*\*  $P < 0.0001$ .
